# Supplementary material
Source: publisher figshare collection journal article supplement (https://acs.figshare.com/ndownloader/files/24973756)

**Supporting Information**

**Fully Automated Radiosynthesis of [<sup>11</sup>C]Guanidines for Cardiac PET Imaging**

Austin Y. Zhao,<sup>1</sup> Allen F. Brooks,<sup>1</sup> David M. Raffel,<sup>1</sup> Jenelle Stauff,<sup>1</sup> Janna Arteaga,<sup>1</sup>

Peter J. H. Scott,<sup>\*1,2</sup> and Xia Shao<sup>\*1</sup>

<sup>1</sup>Department of Radiology, University of Michigan, Ann Arbor MI, USA; <sup>2</sup>Departments of Pharmacology and Medicinal Chemistry, University of Michigan, Ann Arbor MI, USA

\*pjhscott@umich.edu; \*xshao@umich.edu

## Table of Contents

|                                                                  |            |
|------------------------------------------------------------------|------------|
| <b>1. General Procedures, Material, and Methods</b>              | <b>S4</b>  |
| <b>2. General Chemistry</b>                                      | <b>S4</b>  |
| 2.1 General Procedure for Guanidine Substrates                   |            |
| 2.1.1 MFBG Standard                                              |            |
| 2.1.2 MFPG Standard                                              |            |
| 2.1.3 5F-MHPG Standard                                           |            |
| 2.1.4 DOPG Standard                                              |            |
| 2.1.5 GMO Standard                                               |            |
| 2.1.6 MIBG Standard                                              |            |
| 2.1.7 HTG Standard                                               |            |
| 2.1.8 IEG Standard                                               |            |
| 2.2 Synthesis of 3F-PHPOG Standard and Precursor                 |            |
| 2.2.1 3F-PHPOG Standard                                          |            |
| 2.2.2 3F-PHPOG Precursor                                         |            |
| <b>3. Radiochemistry</b>                                         | <b>S15</b> |
| 3.1 Materials and Methods                                        |            |
| 3.2 Synthesis of Hydrogen [ $^{11}\text{C}$ ]Cyanogen            |            |
| 3.3 Synthesis of [ $^{11}\text{C}$ ]Guanidines                   |            |
| 3.4 General HPLC Conditions                                      |            |
| 3.5 Determining Radiochemical Yield                              |            |
| <b>4. Pre-clinical PET Imaging</b>                               | <b>S19</b> |
| 4.1 General Considerations                                       |            |
| 4.2 Rabbit Imaging Protocol                                      |            |
| 4.3 Rabbit PET images and Time-Radioactivity Curves              |            |
| <b>5. References</b>                                             | <b>S20</b> |
| <b>6. Spectra Data</b>                                           | <b>S21</b> |
| 6.1 $^1\text{H}$ , $^{13}\text{C}$ , $^{19}\text{F}$ NMR Spectra |            |
| 6.1.1 MFBG                                                       |            |
| 6.1.2 MFPG                                                       |            |

- 6.1.3 5F-MHPG
- 6.1.4 DOPG
- 6.1.5 GMO
- 6.1.6 MIBG
- 6.1.7 HTG
- 6.1.8 IEG
- 6.1.9 3F-PHPOG

## 6.2 High Resolution Mass Spectrums

- 6.2.1 MFBG
- 6.2.2 MFPG
- 6.2.3 5F-MHPG
- 6.2.4 DOPG
- 6.2.5 GMO
- 6.2.6 MIBG
- 6.2.7 HTG
- 6.2.8 IEG
- 6.2.9 3F-PHPOG

## 6.3 Radio-HPLC Analysis for $^{11}\text{C}$ -Labeled Compounds

- 6.3.1 [ $^{11}\text{C}$ ]MFBG
- 6.3.2 [ $^{11}\text{C}$ ]MFPG
- 6.3.3 [ $^{11}\text{C}$ ]5F-MHPG
- 6.3.4 [ $^{11}\text{C}$ ]DOPG
- 6.3.5 [ $^{11}\text{C}$ ]GMO
- 6.3.6 [ $^{11}\text{C}$ ]MIBG
- 6.3.7 [ $^{11}\text{C}$ ]HTG
- 6.3.8 [ $^{11}\text{C}$ ]IEG
- 6.3.9 [ $^{11}\text{C}$ ]3F-PHPOG

## 1. General Procedures and Materials and Methods

All the chemicals were purchased from commercially available suppliers and used without purification. Automated flash chromatography was performed with Biotage Isolera Prime system. NMR spectra were recorded with a Varian 400 MHz MR NMR (400.53 MHz for  $^1\text{H}$ ; 376.87 MHz for  $^{19}\text{F}$ ; 100 MHz for  $^{13}\text{C}$ ) in  $\text{CDCl}_3$  or  $\text{MeOH-}d_4$  at room temperature with tetramethylsilane (TMS) as an internal standard. Mass spectra were measured on an Agilent 6230 TOF HPLC-MS, Agilent Q-TOF HPLC-MS, or a Micromass VG 70-250-S Magnetic sector mass spectrometer employing the electrospray ionization (ESI) method.

## 2. General Chemistry

### 2.1 General Procedure for Guanidine Substrates

#### General Procedure for Pseudourea Addition

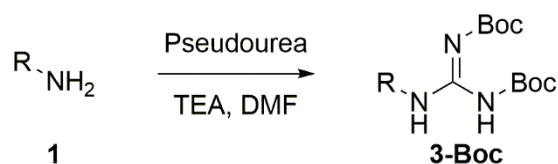

Amine **1** (1 equiv) was dissolved in a solution of anhydrous DMF (0.3 M) and triethylamine (5 equiv) and cooled to 0 °C. 1,3-bis(*tert*-butoxycarbonyl)-2-methyl-2-thiopseudourea (1.3 equiv) was then added portionwise and the resulting mixture was allowed to warm to room temperature and stirred overnight. The mixture was then diluted with ethyl acetate, washed with saturated  $\text{NH}_4\text{Cl}$ , extracted with ethyl acetate (2x), washed with brine, dried over  $\text{Na}_2\text{SO}_4$ , and purified by flash silica gel chromatography.

#### General Procedure for Boc Deprotection

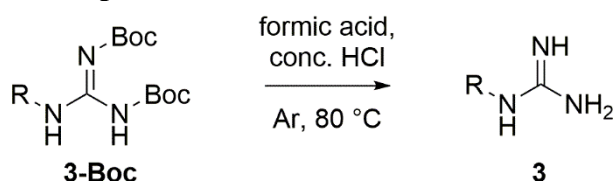

#### Deprotection Method A:

The *tert*-butoxycarbonyl protected guanidine **3-Boc** (0.1 M) was dissolved in a solution of formic acid (10 equiv) and concentrated HCl (1 equiv). The resulting mixture was then stirred overnight under argon at 80 °C. The mixture was then concentrated under vacuum. The residue was then dissolved in methanol and concentrated under vacuum again. This resulting residue was finally purified by flash silica gel chromatography.

#### Deprotection Method B:

The *tert*-butoxycarbonyl protected guanidine **3-Boc** (0.25 M) was dissolved in dioxane (5 equiv) and cooled to 0 °C. Then, 4N HCl in dioxane (1 equiv) was slowly added and stirred overnight.



The solid precipitate was filtered off and washed with Et<sub>2</sub>O and dried under vacuum. The resulting residue was finally purified by flash silica gel chromatography.

### 2.1.1 MFBG Standard

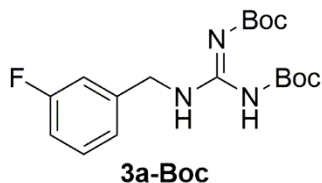

*N',N''-Bis(tert-butoxycarbonyl)-N-(3-fluorobenzyl)guanidine (3a-Boc).*

The general pseudourea procedure was followed using 3-fluorobenzylamine (0.2000 g; 1.60 mmol). The crude product was purified by flash silica gel chromatography (7:1 Hex:EtOAc) to produce a white solid (0.3849 g; 66%).

**<sup>1</sup>H NMR** (400 MHz; CDCl<sub>3</sub>)/δ (ppm): 7.16 (td, *J* = 8.0, 5.9 Hz, 1H), 6.96 (d, *J* = 8.2 Hz, 1H), 6.91 (dt, *J* = 9.6, 2.1 Hz, 1H), 6.84 (td, *J* = 8.5, 2.6 Hz, 1H), 4.51 (d, *J* = 5.4 Hz, 2H), 1.39 (s, 9H), 1.36 (s, 9H); **<sup>13</sup>C NMR** (100 MHz; CDCl<sub>3</sub>)/δ (ppm): 163.42, 162.82 (d, *J* = 245 Hz), 156.10, 153.04, 139.92 (d, *J* = 7 Hz), 130.10 (d, *J* = 8 Hz), 123.09 (d, *J* = 2 Hz), 114.50 (d, *J* = 15 Hz), 114.29 (d, *J* = 14 Hz), 83.05, 79.14, 44.09, 28.14, 27.87; **<sup>19</sup>F NMR** (376 MHz; CDCl<sub>3</sub>)/δ (ppm): -112.60. **HRMS (ESI)** [M + H]<sup>+</sup> Calculated for C<sub>18</sub>H<sub>27</sub>FN<sub>3</sub>O<sub>4</sub>: 368.1986; found 368.1983.

**Note:** Peaks corresponding to the NH protons of the guanidine group were not observed.

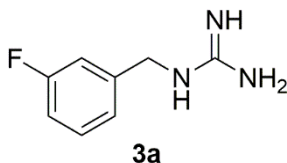

*1-(3-fluorobenzyl)guanidine (3a).*

Deprotection Method A was followed using **3a-Boc** (0.3849 g; 1.05 mmol). The crude product was purified by flash silica gel chromatography (20% MeOH in DCM) to produce a white solid (0.1781 g; 82%).

**<sup>1</sup>H NMR** (400 MHz; MeOH-*d*<sub>4</sub>)/δ (ppm): 7.40 (td, *J* = 8.0, 5.9 Hz, 1H), 7.17 (m, 1H), 7.10 (dt, *J* = 9.8, 2.1 Hz, 1H), 7.04 (td, *J* = 8.6, 2.6 Hz, 1H), 4.45 (s, 2H); **<sup>13</sup>C NMR** (100 MHz; MeOH-*d*<sub>4</sub>)/δ (ppm): 163.00 (d, *J* = 244 Hz), 157.38, 139.24 (d, *J* = 7 Hz), 130.35, 122.76 (d, *J* = 3 Hz), 114.24 (d, *J* = 21 Hz), 113.71 (dd, *J* = 23, 5 Hz), 43.92; **<sup>19</sup>F NMR** (376 MHz; MeOH-*d*<sub>4</sub>)/δ (ppm): -114.65. **HRMS (ESI)** [M+H]<sup>+</sup> Calculated for C<sub>8</sub>H<sub>11</sub>FN<sub>3</sub>: 168.0932; found 168.0930.

**Note:** Peaks corresponding to the NH protons of the guanidine group were not observed.

### 2.1.2 MFPG Standard

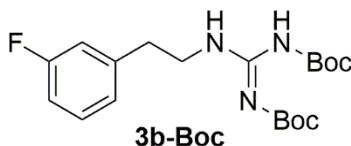

*N',N''-Bis(tert-butoxycarbonyl)-N-(3-fluorophenethyl)guanidine (3b-Boc).*

The general pseudourea procedure was followed using 3-fluorophenethylamine (0.2000 g; 1.44 mmol). The crude product was purified by flash silica gel chromatography (7:1 Hex:EtOAc) to produce a white solid (0.4032 g; 73%).

**<sup>1</sup>H NMR** (400 MHz; CDCl<sub>3</sub>)/δ (ppm): 7.14 (dd, *J* = 14.1, 7.5 Hz, 1H), 6.88 (d, *J* = 7.6 Hz, 1H), 6.82 (m, 2H), 3.56 (q, *J* = 6.6 Hz, 2H), 2.76 (t, *J* = 7.2 Hz, 2H), 1.41 (s, 9H), 1.37 (s, 9H); **<sup>13</sup>C NMR** (100 MHz; CDCl<sub>3</sub>)/δ (ppm): 163.46, 162.79 (d, *J* = 245 Hz), 156.03, 153.01, 140.99 (d, *J* = 7 Hz), 129.87, 124.33 (d, *J* = 3 Hz), 115.60 (d, *J* = 21 Hz), 113.33 (d, *J* = 21 Hz), 82.88, 79.00, 41.74, 34.92 (d, *J* = 2 Hz), 28.17 (d, *J* = 6 Hz), 27.86 (d, *J* = 6 Hz); **<sup>19</sup>F NMR** (376 MHz; CDCl<sub>3</sub>)/δ (ppm): -113.32. **HRMS (ESI)** [M+H]<sup>+</sup> Calculated for C<sub>19</sub>H<sub>29</sub>FN<sub>3</sub>O<sub>4</sub>: 382.2142; found 382.2147.

**Note:** Peaks corresponding to the NH protons of the guanidine group were not observed.

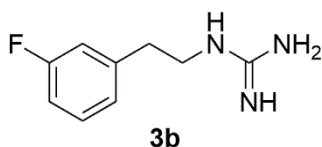

*1-(3-fluorophenethyl)guanidine (3b).*

Deprotection Method A was followed using **3b-Boc** (0.4802 g; 1.26 mmol). The crude product was purified by flash silica gel chromatography (20% MeOH in DCM) to produce a yellow syrup (0.2638 g; 96%).

**<sup>1</sup>H NMR** (400 MHz; MeOH-*d*<sub>4</sub>)/δ (ppm): 7.29 (td, *J* = 8.0, 6.1 Hz, 1H), 7.09 (d, *J* = 7.9 Hz, 1H), 7.05 (dt, *J* = 10.1, 2.1 Hz, 1H), 6.93 (td, *J* = 8.6, 2.6 Hz, 1H), 3.47 (m, 2H), 2.89 (t, *J* = 7.1 Hz, 2H); **<sup>13</sup>C NMR** (100 MHz; MeOH-*d*<sub>4</sub>)/δ (ppm): 162.88 (d, *J* = 243 Hz), 157.21, 140.83 (d, *J* = 7 Hz), 130.03 (d, *J* = 8 Hz), 124.58 (d, *J* = 2 Hz), 115.34 (d, *J* = 22 Hz), 113.08 (d, *J* = 21 Hz), 42.18, 34.30; **<sup>19</sup>F NMR** (376 MHz; MeOH-*d*<sub>4</sub>)/δ (ppm): -115.02. **HRMS (ESI)** [M + H]<sup>+</sup> Calculated for C<sub>9</sub>H<sub>13</sub>FN<sub>3</sub>: 182.1088; found 182.1084.

**Note:** Peaks corresponding to the NH protons of the guanidine group were not observed.

### 2.1.3 5F-MHPG Standard

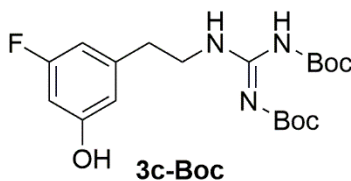

*N',N''-Bis(tert-butoxycarbonyl)-N-(3-fluoro-5-hydroxyphenethyl)guanidine (3c-Boc).*

The general pseudourea procedure was followed using 3-fluoro-5-hydroxyphenethylamine (0.0500 g; 0.32 mmol). The crude product was purified by flash silica gel chromatography (3:1 Hex:EtOAc) to produce a white solid (0.0779 g; 61%).

**<sup>1</sup>H NMR** (400 MHz; CDCl<sub>3</sub>)/δ (ppm): 6.48 (dt, *J* = 10.4, 2.2 Hz, 1H), 6.44 (t, *J* = 1.8 Hz, 1H), 6.33 (dt, *J* = 9.5, 1.8 Hz, 1H), 3.51 (dd, *J* = 15.7, 5.7 Hz, 2H), 2.72 (m, 2H), 1.49 (s, 9H), 1.45 (s, 9H); **<sup>13</sup>C NMR** (100 MHz; CDCl<sub>3</sub>)/δ (ppm): 163.29 (d, *J* = 243 Hz), 162.93, 158.07 (d, *J* = 12 Hz), 156.31, 153.15, 140.83 (d, *J* = 10 Hz), 111.73 (d, *J* = 3 Hz), 106.72 (d, *J* = 18 Hz), 101.33 (d, *J* = 25 Hz), 83.51, 80.00, 41.81, 35.12, 28.14, 28.01; **<sup>19</sup>F NMR** (376 MHz; CDCl<sub>3</sub>)/δ (ppm): -113.23. **HRMS (ESI)** [M + H]<sup>+</sup> Calculated for C<sub>19</sub>H<sub>29</sub>FN<sub>3</sub>O<sub>5</sub>: 398.2086; found 398.2096.

**Note:** Peaks corresponding to the NH protons of the guanidine group and the OH group were not observed.

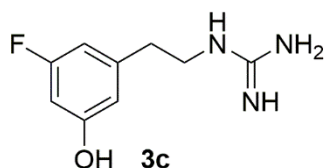

*1-(3-fluoro-5-hydroxyphenethyl)guanidine (3c).*

Deprotection Method A was followed using **3c-Boc** (0.0779 g; 0.20 mmol). The crude product was purified by flash silica gel chromatography (30% MeOH in DCM) to produce a clear syrup (0.0168 g; 43%).

**<sup>1</sup>H NMR** (400 MHz; MeOH-*d*<sub>4</sub>)/δ (ppm): 6.48 (m, 2H), 6.37 (d, *J* = 10.7 Hz, 1H), 3.42 (t, *J* = 7.1 Hz, 2H), 2.79 (t, 7.0 Hz, 2H); **<sup>13</sup>C NMR** (100 MHz; MeOH-*d*<sub>4</sub>)/δ (ppm): 163.7 (d, *J* = 242 Hz), 159.03, 157.14, 141.11, 111.42, 105.80, 100.66, 41.90, 34.35; **<sup>19</sup>F NMR** (376 MHz; MeOH-*d*<sub>4</sub>)/δ (ppm): -114.85. **HRMS (ESI)** [M + H]<sup>+</sup> Calculated for C<sub>9</sub>H<sub>13</sub>FN<sub>3</sub>O: 198.1037; found 198.1046.

**Note:** Peaks corresponding to the NH protons of the guanidine group and the OH group were not observed.

## 2.1.4 DOPG Standard

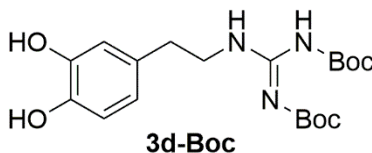

*N',N''-Bis(tert-butoxycarbonyl)-N-3,4-dihydroxyphenethylguanidine (3d-Boc).*

The general pseudourea procedure was followed using 4-(2-aminoethyl)benzene-1,2-diol (0.2000 g; 1.31 mmol). The crude product was purified by flash silica gel chromatography (1:1 Hex:EtOAc) to produce a white solid (0.3900 g; 75%).

**<sup>1</sup>H NMR** (400 MHz; CDCl<sub>3</sub>)/δ (ppm): 6.74 (d, *J* = 8.0 Hz, 1H), 6.64 (d, *J* = 2.0 Hz, 1H), 6.50 (dd, *J* = 8.0, 2.0 Hz, 1H), 3.50 (q, *J* = 6.7 Hz, 2H), 2.68 (t, *J* = 7.6 Hz, 2H), 1.47 (s, 9H), 1.43 (s, 9H); **<sup>13</sup>C NMR** (100 MHz; CDCl<sub>3</sub>)/δ (ppm): 162.98, 156.26, 153.05, 144.30, 142.95, 130.23, 120.48, 115.56 (d, *J* = 3 Hz), 115.36, 83.35, 79.88, 42.61, 34.52, 28.14, 28.00. **HRMS (ESI)** [*M* + *H*]<sup>+</sup> Calculated for C<sub>19</sub>H<sub>30</sub>N<sub>3</sub>O<sub>6</sub>: 396.2135; found 396.2138.

**Note:** Peaks corresponding to the NH protons of the guanidine group and the OH groups were not observed.

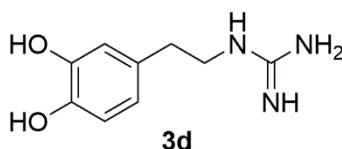

*1-(3,4-dihydroxyphenethyl)guanidine (3d).*

Deprotection Method A was followed using **3d-Boc** (0.3900; 0.99 mmol). Crude product was purified by flash chromatography (20% MeOH in DCM) to give a white solid (0.1445 g; 63%).

**<sup>1</sup>H NMR** (400 MHz; MeOH-*d*<sub>4</sub>)/δ (ppm): 6.72 (m, 2H), 6.57 (dd, *J* = 8.0, 2.1 Hz, 1H), 3.38 (t, *J* = 7.1 Hz, 2H), 2.72 (t, *J* = 7.1 Hz, 2H); **<sup>13</sup>C NMR** (100 MHz; MeOH-*d*<sub>4</sub>)/δ (ppm): 157.11, 144.93, 143.64, 129.41, 119.83, 115.58, 115.18, 42.64, 33.93. **HRMS (ESI)** [*M* + *H*]<sup>+</sup> Calculated for C<sub>9</sub>H<sub>14</sub>N<sub>3</sub>O<sub>2</sub>: 196.1086; found 196.1087.

**Note:** Peaks corresponding to the NH protons of the guanidine group and the OH groups were not observed.

### 2.1.5 GMO Standard

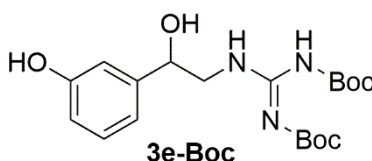

*N',N''-Bis(tert-butoxycarbonyl)-N-(2-hydroxy-2-(3-hydroxyphenyl)ethyl)guanidine (3e-Boc).*

The general pseudourea procedure was followed using 3-(2-amino-1-hydroxyethyl)phenol (0.2000 g; 1.31 mmol). The crude product was purified by flash silica gel chromatography (2:1 Hex:EtOAc) to produce a white solid (0.4837 g; 84%).

**<sup>1</sup>H NMR** (400 MHz; CDCl<sub>3</sub>)/δ (ppm): 7.10 (t, *J* = 7.8 Hz, 1H), 6.81 (m, 2H), 6.73 (ddd, *J* = 8.1, 2.5, 1.0 Hz, 1H), 4.74 (dd, *J* = 8.2, 2.7 Hz, 1H), 3.62 (ddd, *J* = 14.2, 6.3, 2.8 Hz, 1H), 3.51 (ddd, *J* = 14.2, 8.2, 4.6 Hz, 1H), 1.46 (s, 9H), 1.44 (s, 9H); **<sup>13</sup>C NMR** (100 MHz; CDCl<sub>3</sub>)/δ (ppm): 162.75 (d, *J* = 4 Hz), 162.49, 157.01 (d, *J* = 35 Hz), 152.82, 143.30, 129.38, 117.19, 114.91, 113.07, 83.53, 79.80, 73.81 (d, *J* = 7 Hz), 49.10, 28.14, 27.98. **HRMS (ESI)** [*M* + *H*]<sup>+</sup> Calculated for C<sub>19</sub>H<sub>29</sub>N<sub>3</sub>O<sub>6</sub>: 396.2135; found 396.2140.

**Note:** Peaks corresponding to the NH protons of the guanidine group and the OH groups were not observed.

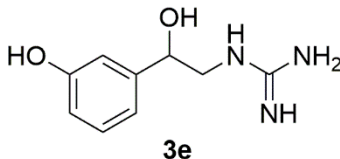

*1-(2-hydroxy-2-(3-hydroxyphenyl)ethyl)guanidine (3e).*

Deprotection Method A was followed using **3e-Boc** (0.4837 g; 1.22 mmol). The crude product was purified by flash silica gel chromatography (20% MeOH in DCM) to produce a white solid (0.0344 g; 12%).

**<sup>1</sup>H NMR** (400 MHz; MeOH-*d*<sub>4</sub>)/δ (ppm): 7.17 (t, *J* = 8.1 Hz, 1H), 6.87 (m, 2H), 6.71 (m, 1H), 4.76 (dd, *J* = 7.6, 3.7 Hz, 1H), 3.42 (dd, *J* = 13.9, 3.8 Hz, 1H), 3.32 (m, 1H); **<sup>13</sup>C NMR** (100 MHz; MeOH-*d*<sub>4</sub>)/δ (ppm): 157.96, 157.30, 143.23, 129.15, 116.76, 114.35, 112.54, 71.91 (d, *J* = 11 Hz), 48.61. **HRMS (ESI)** [*M* + *H*]<sup>+</sup> Calculated for C<sub>9</sub>H<sub>14</sub>N<sub>3</sub>O<sub>2</sub>: 196.1086; found 196.1082.

**Note:** Peaks corresponding to the NH protons of the guanidine group and the OH groups were not observed.

## 2.1.6 MIBG Standard

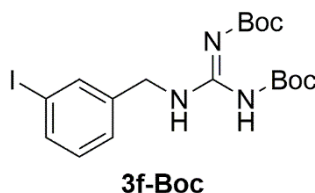

*N',N''-Bis(tert-butoxycarbonyl)-N-(3-iodobenzyl)guanidine (3f-Boc).*

The general pseudourea procedure was followed using 3-iodobenzylamine (0.2000 g; 0.86 mmol). The crude product was purified by flash silica gel chromatography (3:1 Hex:EtOAc) to produce a clear syrup-like solid (0.4385 g).

**<sup>1</sup>H NMR** (400 MHz; CDCl<sub>3</sub>)/δ (ppm): 7.58 (t, *J* = 1.7 Hz, 1H), 7.50 (dt, *J* = 7.9, 1.3 Hz, 1H), 7.18 (d, *J* = 7.7 Hz, 1H), 6.96 (t, *J* = 7.8 Hz, 1H), 4.48 (d, *J* = 5.4 Hz, 2H), 1.42 (s, 9H), 1.39 (s, 9H); **<sup>13</sup>C NMR** (100 MHz; CDCl<sub>3</sub>)/δ (ppm): 163.41, 156.04, 153.04, 139.74, 136.77 (d, *J* = 6 Hz), 136.58 (d, *J* = 3 Hz), 130.34, 126.98, 94.56, 83.13, 79.23, 43.94, 28.27, 28.02. **HRMS (ESI)** [*M* + *H*]<sup>+</sup> Calculated for C<sub>18</sub>H<sub>27</sub>IN<sub>3</sub>O<sub>4</sub>: 476.1046; found 476.1039.

**Note:** Peaks corresponding to the NH protons of the guanidine group were not observed.

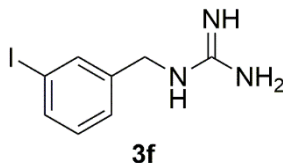

*1-(3-iodobenzyl)guanidine (3f).*

Deprotection Method A was followed using **3f-Boc** (0.4385 g; 0.92 mmol). The crude product was purified by flash silica gel chromatography (20% MeOH in DCM) to produce a white solid (0.2675 g; 93%).

**<sup>1</sup>H NMR** (400 MHz; MeOH-*d*<sub>4</sub>)/δ (ppm): 7.73 (t, *J* = 1.8 Hz, 1H), 7.64 (dt, *J* = 7.9, 1.4 Hz, 1H), 7.36 (ddd, *J* = 7.7, 1.8, 1.0 Hz, 1H), 7.13 (t, *J* = 7.8 Hz, 1H), 4.42 (s, 2H); **<sup>13</sup>C NMR** (100 MHz; MeOH-*d*<sub>4</sub>)/δ (ppm): 157.28 (t, *J* = 5 Hz), 138.88, 136.73 (d, *J* = 6 Hz), 135.97 (d, *J* = 6 Hz), 130.42 (d, *J* = 3 Hz), 126.42 (d, *J* = 4 Hz), 94.20, 43.79. **HRMS (ESI)** [*M* + *H*]<sup>+</sup> Calculated for C<sub>8</sub>H<sub>11</sub>IN<sub>3</sub>: 275.9998; found 275.9994.

**Note:** Peaks corresponding to the NH protons of the guanidine group were not observed.

### 2.1.7 HTG Standard

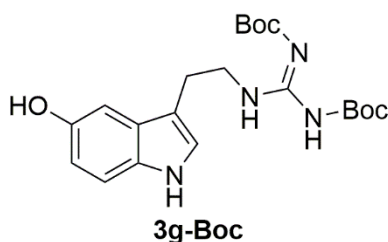

*N',N''-Bis(tert-butoxycarbonyl)-N-(2-(5-hydroxy-1H-indol-3-yl)ethyl)guanidine (3g-Boc).*

The general pseudourea procedure was followed using serotonin (0.2000 g; 1.13 mmol). The crude product was purified by flash silica gel chromatography (2% MeOH in DCM) to produce a clear gel (0.3147 g; 67%).

**<sup>1</sup>H NMR** (400 MHz; MeOH-*d*<sub>4</sub>)/δ (ppm): 7.15 (dd, *J* = 8.6, 0.6 Hz, 1H), 7.05 (s, 1H), 6.92 (dd, *J* = 2.3, 0.6 Hz, 1H), 6.66 (dd, *J* = 8.7, 2.4 Hz, 1H), 3.63 (t, *J* = 6.9 Hz, 2H), 2.93 (t, *J* = 6.9 Hz, 2H), 1.47 (s, 18H); **<sup>13</sup>C NMR** (100 MHz; MeOH-*d*<sub>4</sub>)/δ (ppm): 163.15, 156.08, 152.58, 149.80, 131.71, 127.85, 123.18 (d, *J* = 3 Hz), 111.32, 111.09, 110.34, 102.09, 82.91, 78.93, 41.04, 27.23, 26.81, 24.44. **HRMS (ESI)** [*M* + *H*]<sup>+</sup> Calculated for C<sub>21</sub>H<sub>31</sub>N<sub>4</sub>O<sub>5</sub>: 419.2294; found 419.2289.

**Note:** Peaks corresponding to the NH protons of the guanidine group and indole ring as well as the OH group were not observed.

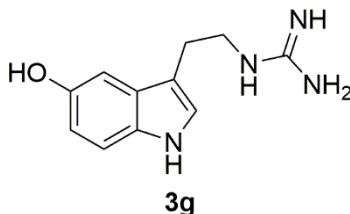

*1-(2-(5-hydroxy-1H-indol-3-yl)ethyl)guanidine (3g).*

Deprotection Method B was followed using **3g-Boc** (0.1886 g; 0.45 mmol). The crude product was purified by flash silica gel chromatography (30% MeOH in DCM) to produce an opaque solid (0.0302 g; 26%).

**<sup>1</sup>H NMR** (400 MHz; MeOH-*d*<sub>4</sub>)/ $\delta$  (ppm): 7.18 (dd, *J* = 8.7, 0.6 Hz, 1H), 7.08 (s, 1H), 6.92 (dd, *J* = 2.3, 0.6 Hz, 1H), 6.68 (dd, *J* = 8.7, 2.3 Hz, 1H), 3.47 (t, *J* = 6.9 Hz, 2H), 2.95 (t, *J* = 6.9 Hz, 2H); **<sup>13</sup>C NMR** (100 MHz; MeOH-*d*<sub>4</sub>)/ $\delta$  (ppm): 157.18, 149.88 (d, *J* = 3 Hz), 131.72, 127.75, 123.40 (d, *J* = 63 Hz), 111.43 (d, *J* = 63 Hz), 109.66, 102.05, 41.60, 24.38. **HRMS (ESI)** [*M* + *H*]<sup>+</sup> Calculated for C<sub>11</sub>H<sub>15</sub>N<sub>4</sub>O: 219.1246; found 219.1237.

**Note:** Peaks corresponding to the NH protons of the guanidine group and indole ring as well as the OH group were not observed.

### 2.1.8 IEG Standard

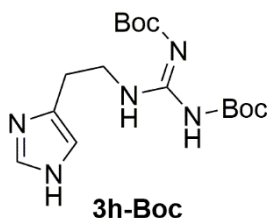

*N',N''-Bis(tert-butoxycarbonyl)-N-(2-(1H-imidazol-4-yl)ethyl)guanidine (3h-Boc).*

The general pseudourea procedure was followed using histamine (0.2000 g; 1.80 mmol). The crude product was purified by flash silica gel chromatography (10% MeOH in DCM) to produce an off-white crystal (0.2979 g; 47%).

**<sup>1</sup>H NMR** (400 MHz; MeOH-*d*<sub>4</sub>)/ $\delta$  (ppm): 7.60 (d, *J* = 1.2 Hz, 1H), 6.87 (d, *J* = 1.2 Hz, 1H), 3.60 (t, *J* = 7.0 Hz, 2H), 2.84 (t, *J* = 7.1 Hz, 2H), 1.48 (s, 9H), 1.46 (s, 9H); **<sup>13</sup>C NMR** (100 MHz; MeOH-*d*<sub>4</sub>)/ $\delta$  (ppm): 163.08 (d, *J* = 2 Hz), 156.00, 152.66, 134.99 (d, *J* = 6 Hz), 134.03, 117.15, 82.94, 78.72, 40.27, 27.59, 27.22, 26.30. **HRMS (ESI)** [*M* + *H*]<sup>+</sup> Calculated for C<sub>16</sub>H<sub>28</sub>N<sub>5</sub>O<sub>4</sub>: 354.2141; found 354.2133.

**Note:** Peaks corresponding to the NH protons of the guanidine group and imidazole ring were not observed.

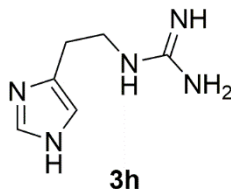

*1-(2-(1H-imidazol-4-yl)ethyl)guanidine (3h).*

Deprotection Method B was followed using **3h-Boc** (0.2979 g; 0.84 mmol). The crude product was purified by flash silica gel chromatography (20% MeOH in DCM) to produce a white solid (0.1483 g; 93%).

**<sup>1</sup>H NMR** (400 MHz; MeOH-*d*<sub>4</sub>)/δ (ppm): 8.62 (s, 1H), 7.38 (s, 1H), 3.57 (t, *J* = 7.0 Hz, 2H), 3.02 (t, *J* = 7.0 Hz, 2H); **<sup>13</sup>C NMR** (100 MHz; MeOH-*d*<sub>4</sub>)/δ (ppm): 157.26 (d, *J* = 5 Hz), 134.02, 131.13, 116.82, 40.15, 24.45. **HRMS (ESI)** [*M* + *H*]<sup>+</sup> Calculated for C<sub>6</sub>H<sub>12</sub>N<sub>5</sub>: 154.1087; found 154.1081.

**Note:** Peaks corresponding to the NH protons of the guanidine group and imidazole ring were not observed.

## 2.2 Synthesis of 3F-PHPOG Standard and Precursor

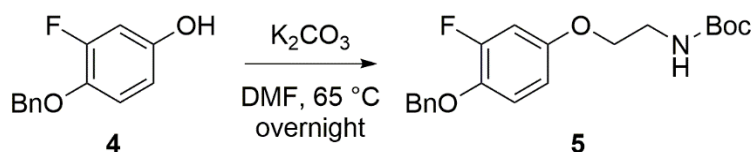

*Tert-butyl (2-(4-(benzyloxy)-3-fluorophenoxy)ethyl)carbamate (5).*

4-(benzyloxy)-3-fluorophenol **4** (0.2000 g; 0.92 mmol; 1 equiv), 2-(boc-amino)ethyl bromide (0.2465 g; 1.10 mmol; 1.2 equiv), and potassium carbonate (1.3351 g; 9.66 mmol; 10.5 equiv) were dissolved in DMF (3.1 mL) and stirred at 65 °C overnight. The reaction mixture was quenched with water and the solid was filtered off. The product was then extracted with ethyl acetate (3x), washed with water (2x), washed with brine (1x), dried over sodium sulfate, and purified by flash silica gel chromatography (4:1 Hex:EtOAc). The product was a clear syrup-like solid (0.2784 g; 84% yield).

**<sup>1</sup>H NMR** (400 MHz; CDCl<sub>3</sub>)/δ (ppm): 7.36 (m, 5H), 6.88 (t, *J* = 9.2 Hz, 1H), 6.67 (dd, *J* = 12.5, 2.9 Hz, 1H), 6.52 (ddd, *J* = 9.0, 3.0, 1.5 Hz, 1H), 5.04 (s, 2H), 3.90 (t, *J* = 5.2 Hz, 2H), 3.47 (t, *J* = 2.7 Hz, 2H), 1.45 (s, 9H); **<sup>13</sup>C NMR** (100 MHz; CDCl<sub>3</sub>)/δ (ppm): 155.96, 153.44 (d, *J* = 245 Hz), 153.43 (d, *J* = 9 Hz), 140.80 (d, *J* = 11 Hz), 136.83, 128.55 (d, *J* = 35 Hz), 128.06 (d, *J* = 35 Hz), 127.58 (d, *J* = 33 Hz), 117.41, 109.26 (d, *J* = 18 Hz), 104.01 (dd, *J* = 21, 8 Hz), 79.42, 72.41, 67.68, 40.00, 28.40 (d, *J* = 17 Hz); **<sup>19</sup>F NMR** (376 MHz; CDCl<sub>3</sub>)/δ (ppm): -130.33. **HRMS (ESI)** [*M* + *Na*]<sup>+</sup> Calculated for C<sub>20</sub>H<sub>24</sub>FNO<sub>4</sub>Na: 384.1587; found 384.1585.



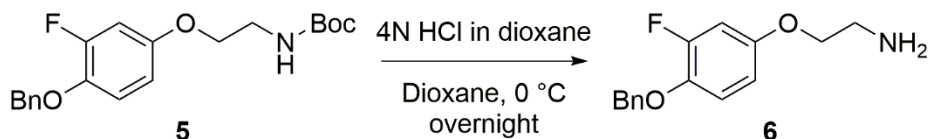

*2-(4-(benzyloxy)-3-fluorophenoxy)ethan-1-amine (6).*

Tert-butyl (2-(4-(benzyloxy)-3-fluorophenoxy)ethyl)carbamate **5** (0.2784 g; 0.77 mmol) was dissolved in dioxane (0.55 mL) and cooled to 0 °C. Then, 4N HCl in dioxane (2.57 mL) was slowly added and stirred overnight. The solid precipitate was filtered off and washed with Et<sub>2</sub>O and dried under vacuum. The crude solid was then purified by flash silica gel chromatography (20% MeOH in DCM). The product was a beige solid (0.1297 g, 57% yield).

**<sup>1</sup>H NMR** (400 MHz; CDCl<sub>3</sub>)/δ (ppm): 7.38 (m, 5H), 7.04 (t, *J* = 9.3 Hz, 1H), 6.83 (dd, *J* = 12.7, 2.9 Hz, 1H), 6.70 (ddd, *J* = 9.0, 3.0, 1.6 Hz, 1H), 5.05 (s, 2H), 4.11 (t, *J* = 5.1 Hz, 2H), 3.25 (t, *J* = 5.0 Hz, 2H); **<sup>13</sup>C NMR** (100 MHz; CDCl<sub>3</sub>)/δ (ppm): 153.26 (d, *J* = 244 Hz), 152.94 (d, *J* = 10 Hz), 141.06 (d, *J* = 11 Hz), 136.97, 128.28, 127.73 (d, *J* = 35 Hz), 127.20, 117.14 (d, *J* = 26 Hz), 109.30 (d, *J* = 4 Hz), 103.73 (dd, *J* = 24, 10 Hz), 71.83, 65.52, 39.14; **<sup>19</sup>F NMR** (376 MHz; CDCl<sub>3</sub>)/δ (ppm): -132.66. **HRMS (ESI)** [M + H]<sup>+</sup> Calculated for C<sub>15</sub>H<sub>17</sub>FN<sub>2</sub>O<sub>2</sub>: 262.1238; found 262.1229.

**Note:** Peaks corresponding to the NH protons of the amine were not observed.

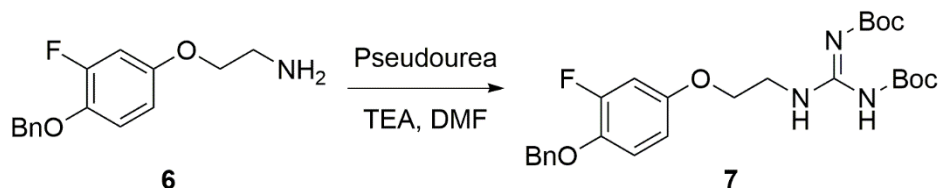

*N',N''-Bis(tert-butoxycarbonyl)-N-(2-(4-(benzyloxy)-3-fluorophenoxy)ethyl)guanidine (7).*

2-(4-(benzyloxy)-3-fluorophenoxy)ethan-1-amine **6** (0.1297 g; 0.44 mmol; 1 equiv) was dissolved in a solution of anhydrous DMF (1.47 mL) and triethylamine (0.31 mL; 2.2 mmol; 5 equiv) and cooled to 0 °C. 1,3-bis(tert-butoxycarbonyl)-2-methyl-2-thiopseudourea (0.1655 g; 0.57 mmol; 1.3 equiv) was then added portionwise and the resulting mixture was allowed to warm to room temperature and stirred overnight. The mixture was then diluted with ethyl acetate, washed with saturated NH<sub>4</sub>Cl, extracted with ethyl acetate (2x), washed with brine, dried over Na<sub>2</sub>SO<sub>4</sub>, and purified by flash silica gel chromatography (7:1 Hex:EtOAc). The product was a clear syrup-like solid (0.1679 g; 76%).

**<sup>1</sup>H NMR** (400 MHz; CDCl<sub>3</sub>)/δ (ppm): 7.36 (m, 5H), 6.88 (t, *J* = 9.2 Hz, 1H), 6.73 (dd, *J* = 12.5, 2.9 Hz, 1H), 6.57 (ddd, *J* = 9.0, 3.0, 1.5 Hz, 1H), 5.04 (s, 2H), 3.99 (t, *J* = 5.2 Hz, 2H), 3.79 (q, *J* = 5.31 Hz, 2H), 1.50 (s, 9H), 1.48 (s, 9H); **<sup>13</sup>C NMR** (100 MHz; CDCl<sub>3</sub>)/δ (ppm): 163.45, 156.34, 153.46 (d, *J* = 246 Hz), 153.24 (d, *J* = 10 Hz), 153.03, 140.94 (d, *J* = 11 Hz), 136.80, 128.52 (d, *J* = 40 Hz), 128.03 (d, *J* = 41 Hz), 127.53 (d, *J* = 38 Hz), 117.45, 109.46, 104.45, 83.17, 79.32, 72.49, 66.96, 40.02, 28.28 (d, *J* = 19 Hz), 28.03 (d, *J* = 19 Hz); **<sup>19</sup>F NMR** (376 MHz; CDCl<sub>3</sub>)/δ (ppm): -130.36. **HRMS (ESI)** [M + H]<sup>+</sup> Calculated for C<sub>26</sub>H<sub>35</sub>FN<sub>3</sub>O<sub>6</sub>: 504.2504; found 504.2501.

**Note:** Peaks corresponding to the NH protons of the guanidine group were not observed.

### 2.1.1 3F-PHPOG Standard (3i)

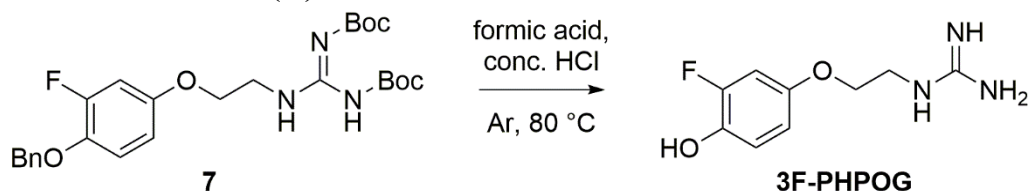

*1-(2-(4-(hydroxy)-3-fluorophenoxy)ethyl)guanidine (3F-PHPOG).*

N',N''-Bis(tert-butoxycarbonyl)-N-(2-(4-(benzyloxy)-3-fluorophenoxy)ethyl)guanidine **7** (0.1679 g; 0.33 mmol) was dissolved in a solution of formic acid (3.0 mL; 10 equiv) and concentrated HCl (0.3 mL; 1 equiv). The resulting mixture was then stirred overnight under argon at 80 °C. The yellow mixture was then concentrated under vacuum. The residue was then dissolved in methanol and concentrated under vacuum again. This resulting residue was finally purified by flash silica gel chromatography (20% MeOH in DCM). The product was a white solid (0.0604 g; 86%).

**<sup>1</sup>H NMR** (400 MHz; MeOH-*d*<sub>4</sub>)/ $\delta$  (ppm): 6.84 (dd, *J* = 9.9, 8.8 Hz, 1H), 6.73 (dd, *J* = 12.5, 2.9 Hz, 1H), 6.61 (ddd, *J* = 8.9, 2.9, 1.4 Hz, 1H), 4.03 (t, *J* = 5.0 Hz, 2H), 3.57 (t, *J* = 5.0 Hz, 2H); **<sup>13</sup>C NMR** (100 MHz; MeOH-*d*<sub>4</sub>)/ $\delta$  (ppm): 157.63, 151.60 (d, *J* = 9 Hz), 151.43 (d, *J* = 240 Hz), 138.99, 117.64 (d, *J* = 6 Hz), 109.87, 103.33, 66.81, 40.85; **<sup>19</sup>F NMR** (376 MHz; MeOH-*d*<sub>4</sub>)/ $\delta$  (ppm): -136.43. **HRMS (ESI)** [M + H]<sup>+</sup> Calculated for C<sub>9</sub>H<sub>13</sub>FN<sub>3</sub>O<sub>2</sub>: 214.0986; found 214.0985.

**Note:** Peaks corresponding to the NH protons of the guanidine group and the OH group were not observed.

### 2.1.2 3F-PHPOG Precursor (1i)

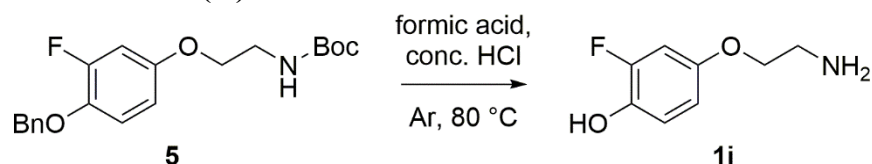

*4-(2-aminoethoxy)-2-fluorophenol (1i).*

Tert-butyl (2-(4-(benzyloxy)-3-fluorophenoxy)ethyl)carbamate **5** (0.2950 g; 0.82 mmol) was dissolved in a solution of formic acid (7.45 mL; 10 equiv) and concentrated HCl (.75 mL; 1 equiv). The resulting mixture was then stirred overnight under argon at 80 °C. The mixture was then concentrated under vacuum. The residue was then dissolved in methanol and concentrated under vacuum again. This resulting residue was finally purified by flash silica gel chromatography (20% MeOH in DCM). The product was a white solid (0.1053 g; 75%).

**<sup>1</sup>H NMR** (400 MHz; MeOH-*d*<sub>4</sub>)/ $\delta$  (ppm): 6.87 (t, *J* = 9.4 Hz, 1H), 6.79 (dd, *J* = 12.5, 2.9 Hz, 1H), 6.66 (ddd, *J* = 8.1, 2.5, 1.0 Hz, 1H), 4.15 (t, *J* = 4.9 Hz, 2H), 3.33 (t, *J* = 5.0 Hz, 2H); **<sup>13</sup>C NMR** (100 MHz; MeOH-*d*<sub>4</sub>)/ $\delta$  (ppm): 151.42 (d, *J* = 239 Hz), 151.27 (d, *J* = 9 Hz), 139.15, 117.60, 110.04, 103.36, 64.67, 39.00; **<sup>19</sup>F NMR** (376 MHz; MeOH-*d*<sub>4</sub>)/ $\delta$  (ppm): -136.27. **HRMS (ESI)** [M + H]<sup>+</sup> Calculated for C<sub>8</sub>H<sub>11</sub>FN<sub>2</sub>O<sub>2</sub>: 172.0768; found 172.0764.

**Note:** Peaks corresponding to the NH protons of the amine and the OH group were not observed.

### 3. Radiochemistry

#### 3.1 Materials and Methods

All the chemicals were purchased from commercially available suppliers and used without purification: Ammonium Acetate, Ammonium Chloride, Ammonium Hydroxide, Sodium Acetate, Phosphoric Acid, and Acetic Acid (glacial) was obtained from Fisher Scientific; and HPLC columns were acquired from Phenomenex. High-performance liquid chromatography (HPLC) was performed using a Shimadzu LC-2010A HT system equipped with a Bioscan B-FC-1000 radiation detector.

#### 3.2 Synthesis of Hydrogen [ $^{11}\text{C}$ ]Cyanide

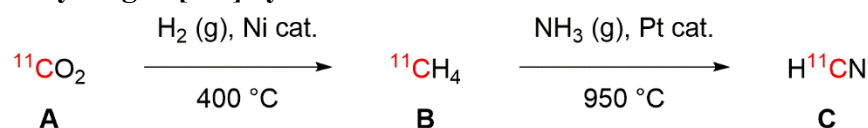

Hydrogen [ $^{11}\text{C}$ ]cyanide ( $\sim 900$  mCi) was produced following reported procedure<sup>1</sup>. Briefly, [ $^{11}\text{C}$ ]carbon dioxide **A** ( $\sim 3$  Ci) was produced by General Electric (GE) Medical Systems PETtrace cyclotron. The GE Carbon-11 target was loaded with [ $^{14}\text{N}$ ]N<sub>2</sub> and 0.5% [ $^{16}\text{O}$ ]O<sub>2</sub> gas and bombarded with a proton beam to generate [ $^{11}\text{C}$ ]carbon dioxide **A** by the  $^{14}\text{N}(\text{p},\alpha)^{11}\text{C}$  nuclear reaction. [ $^{11}\text{C}$ ]Carbon dioxide **A** was then transferred to a GE Process Cabinet to be converted into [ $^{11}\text{C}$ ]HCN **C**. First, [ $^{11}\text{C}$ ]carbon dioxide **A** was trapped on molecular sieves (4A, 80/100 mesh) and then passed through a nickel catalyst column (Shimalite-Ni reduced, 80/100 mesh) with H<sub>2</sub> (g) at 400 °C to afford [ $^{11}\text{C}$ ]methane **B**. After passage through a drying tower containing P<sub>2</sub>O<sub>5</sub> and an ascarite trap, the [ $^{11}\text{C}$ ]methane **B** formed was mixed with ammonia gas and passed through a quartz furnace containing a platinum catalyst (Platinum gauze, 100 mesh) held at 950 °C to yield hydrogen [ $^{11}\text{C}$ ]cyanide **C**.

#### 3.3 Radiochemical Synthesis of [ $^{11}\text{C}$ ]Guanidines

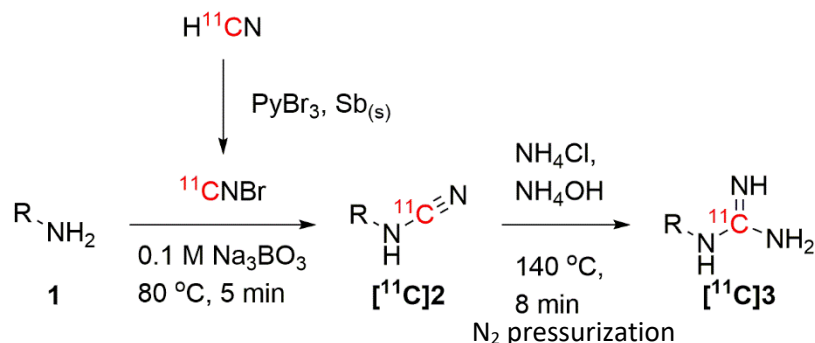

Production of [ $^{11}\text{C}$ ]guanidines was carried out using a TracerLab FX<sub>M</sub> automated radiochemistry synthesis module with modification. (**Figure S1**). To maintain the reaction pressure during heating, the lines from V1 and V2 to the reactor were shortened to their minimum length. The line from V3 and V4 was removed from reactor and replaced with a plugger. A column containing PyBr<sub>3</sub>/Sb was inserted between HCN deliver line and the needle of reactor. In a typical run

hydrogen [ $^{11}\text{C}$ ]cyanide ( $\sim 900$  mCi) produced from the GE PETtrace cyclotron and process panel<sup>1</sup> was passed through a quartz tube containing pyridinium bromide perbromide and antimony powder to yield [ $^{11}\text{C}$ ]CNBr ( $\sim 500$  mCi), and bubbled into the reactor containing 24  $\mu\text{mol}$  of amine precursor **1** dissolved in 250  $\mu\text{L}$  0.1 M sodium borate (pH 8.0). This process was held for 6 minutes and 30 seconds. The reaction vessel was then heated to 80  $^{\circ}\text{C}$  and held for 5 minutes to produce [ $^{11}\text{C}$ ]cyanamide intermediate [ $^{11}\text{C}$ ]**2**. The solution was then cooled to 70  $^{\circ}\text{C}$ . After the solution reached 70  $^{\circ}\text{C}$ , 250  $\mu\text{L}$  of 35%  $\text{NH}_4\text{Cl}$  in 28%  $\text{NH}_4\text{OH}$  was added to the reactor and the valve was kept open for 1 minute to add nitrogen carrier gas to increase pressure in the reactor after the vent valve closed. The reaction was then heated to 140  $^{\circ}\text{C}$  and held for 8 minutes to produce crude [ $^{11}\text{C}$ ]guanidine product [ $^{11}\text{C}$ ]**3**. After heating, the solution was cooled to 40  $^{\circ}\text{C}$ . The cooled solution was then diluted with 500  $\mu\text{L}$  HPLC solvent (10% EtOH in 60 mM  $\text{NH}_4\text{OAc}$ ) plus 200  $\mu\text{L}$  acetic acid. The mixture was loaded onto a semi-preparative HPLC loop (Phenomenex Synergi HydroRP 80A, 10 $\mu$ , 250 x 10.00 mm) and eluted with 10% EtOH in 60 mM ammonium acetate at a flow rate of 5.0 mL/min. The radioactive product peak was collected and QC analyses were performed.

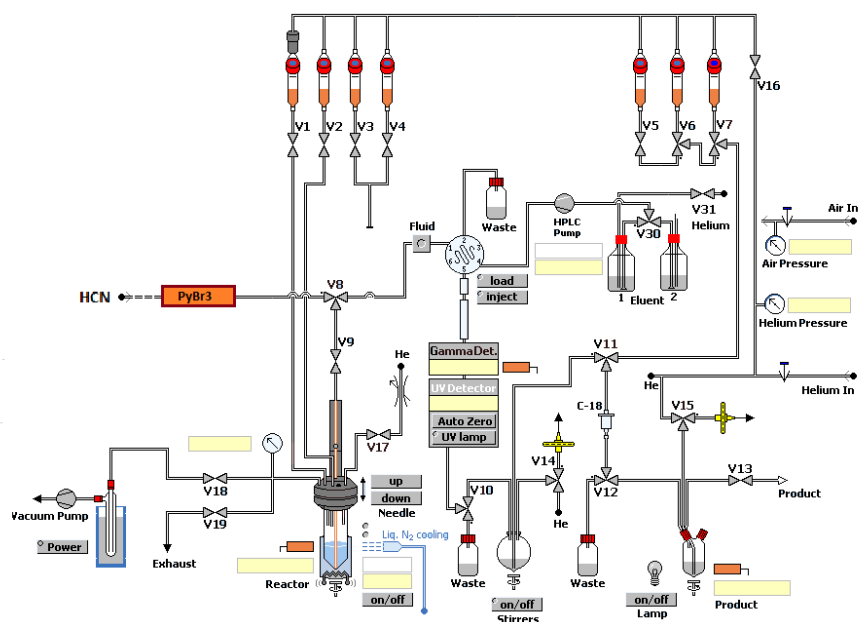

**Figure S1:** GE TracerLab FX<sub>M</sub> with modification

Automation allowed for improved control over the pressure in the conversion of [ $^{11}\text{C}$ ]cyanamides to [ $^{11}\text{C}$ ]guanidines but, on occasion, the high pressure and temperature resulted in the reaction solution partially escaping into the lower pressure lines between the reactor and external valves, resulting in lower conversion. To address this we modified the module by eliminating extra lines and shortening the lines connected to the reactor to limit dead space in the system.

### 3.4 General QC HPLC Conditions

Two general sets of HPLC conditions were used: a gradient method (Conditions A) and an isocratic method (Conditions B).

#### HPLC Conditions A:

*Condition:* 0-50% gradient of EtOH in 10 mM NaOAc

*Temperature:* 40 °C

*Flow rate:* 2 mL/min

*Column:* Phenomenex Synergi HydroRP 80A 150 x 4.6 mm. 4μ.

|           |                |                 |
|-----------|----------------|-----------------|
| 0-5 min   | 0% EtOH        | isocratic       |
| 5-20 min  | 0% to 50% EtOH | linear increase |
| 20-30 min | 0% EtOH        | isocratic       |

HPLC Conditions B:

*Condition:* 10% EtOH in 60 mM NH<sub>4</sub>OAc

*Temperature:* 40 °C

*Flow rate:* 1.2 mL/min

*Column:* Phenomenex Synergi HydroRP 80A 250 x 4.6 mm. 10μ.

### 3.5 Determination of Radiochemical Yield

Radiochemical yield was determined by HPLC analysis of the crude product.

$$\% \text{ RCY} = [\text{Area of } [^{11}\text{C}]\text{guanidine product peak} / \text{Total area of all } ^{11}\text{C}\text{-labeled species peaks}] \times 100$$

Activity yield was determined by measurement of isolated product.

$$\% \text{ AY} = [\text{mCi of } [^{11}\text{C}]\text{guanidine product} / \text{mCi } [^{11}\text{C}]\text{BrCN}] \times 100$$

## 4. Pre-clinical PET Imaging

### 4.1 General Considerations

Rabbit imaging studies were performed at the University of Michigan, in accordance with the standards set by the Institutional Animal Care and Use Committee (IACUC) and all applicable federal, state, local, and institutional laws or guidelines governing animal research.

### 4.2 Rabbit Imaging Protocol

PET imaging studies (Figure S2) were performed using a Concorde Microsystems P4 PET scanner (Siemens, Knoxville, TN, USA). The animals (New Zealand white rabbit, 3.8 – 4.0 kg) were masked with gas anesthesia isoflurane (Patterson Veterinary Supply Inc., Devens, MA, USA). Anesthesia was maintained throughout the duration of the PET scan.  $2.8 \pm 0.4$  mCi of [ $^{11}\text{C}$ ]3F-PHPOG was administered in a bolus dose over one minute ( $n=2$ ). Emission data were collected beginning with the injection and continued for 60.0 min (12x10s, 2x30s, 2x60s, 2x150s, 2x300s, 4x600s frames). Data were corrected for attenuation and scatter and reconstructed using the three dimensional–maximum a priori method (3D MAP algorithm). The dynamic sequence of PET images was summed and regions-of-interest (ROIs) were drawn manually on multiple planes to generate time-activity curves (Figure S3).

### 4.3 Rabbit PET Images and Time-Radioactivity Curves

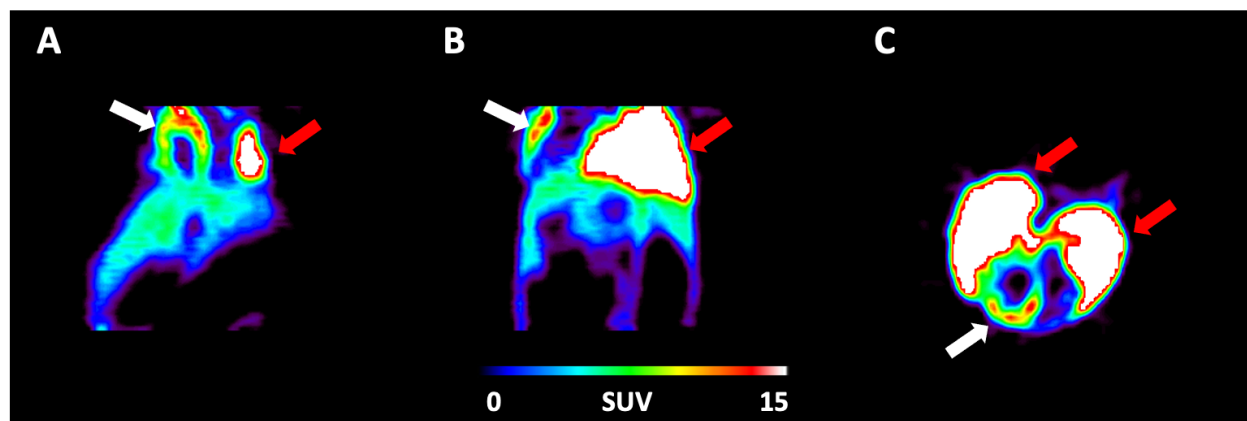

**Figure S2.** Representative coronal (A), sagittal (B) and transverse (C) PET images of rabbit heart (0 – 60 min post-injection of  $2.8 \pm 0.4$  mCi [ $^{11}\text{C}$ ]3F-PHPOG) showing heart (white arrows) and lung (red arrows) regions

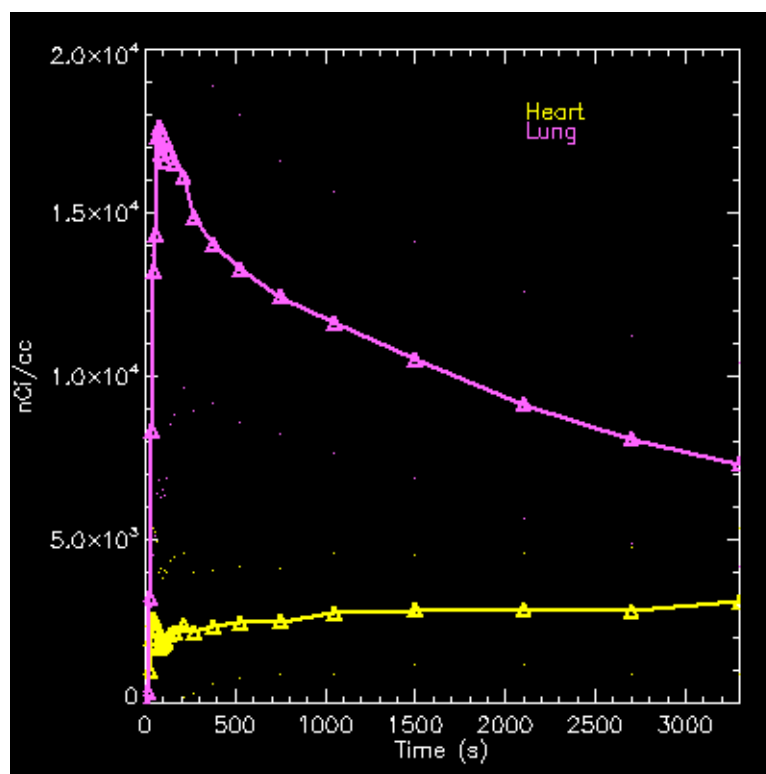

**Figure S3.** Heart and Lung Time-Radioactivity Curves for [<sup>11</sup>C]3F-PHPOG



## 5. References

- [1] Shao, X.; Rodnick, M. E.; Brooks, A. F.; Scott, P. J. H. Synthesis and Applications of [ $^{11}\text{C}$ ]Hydrogen Cyanide. In *Radiochemical Syntheses, Volume 2: Further Radiopharmaceuticals for Positron Emission Tomography and New Strategies for Their Production*; Scott, P. J. H., Eds.; John Wiley & Sons, Incorporated: New Jersey, 2015; pp 233-240.

## 6. Spectra Data

### 6.1 NMR Spectra

#### 6.1.1 MFBG

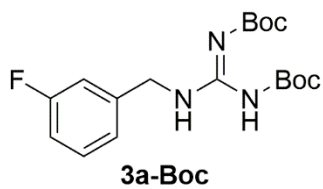

#### $^1\text{H}$ NMR for 3a-Boc

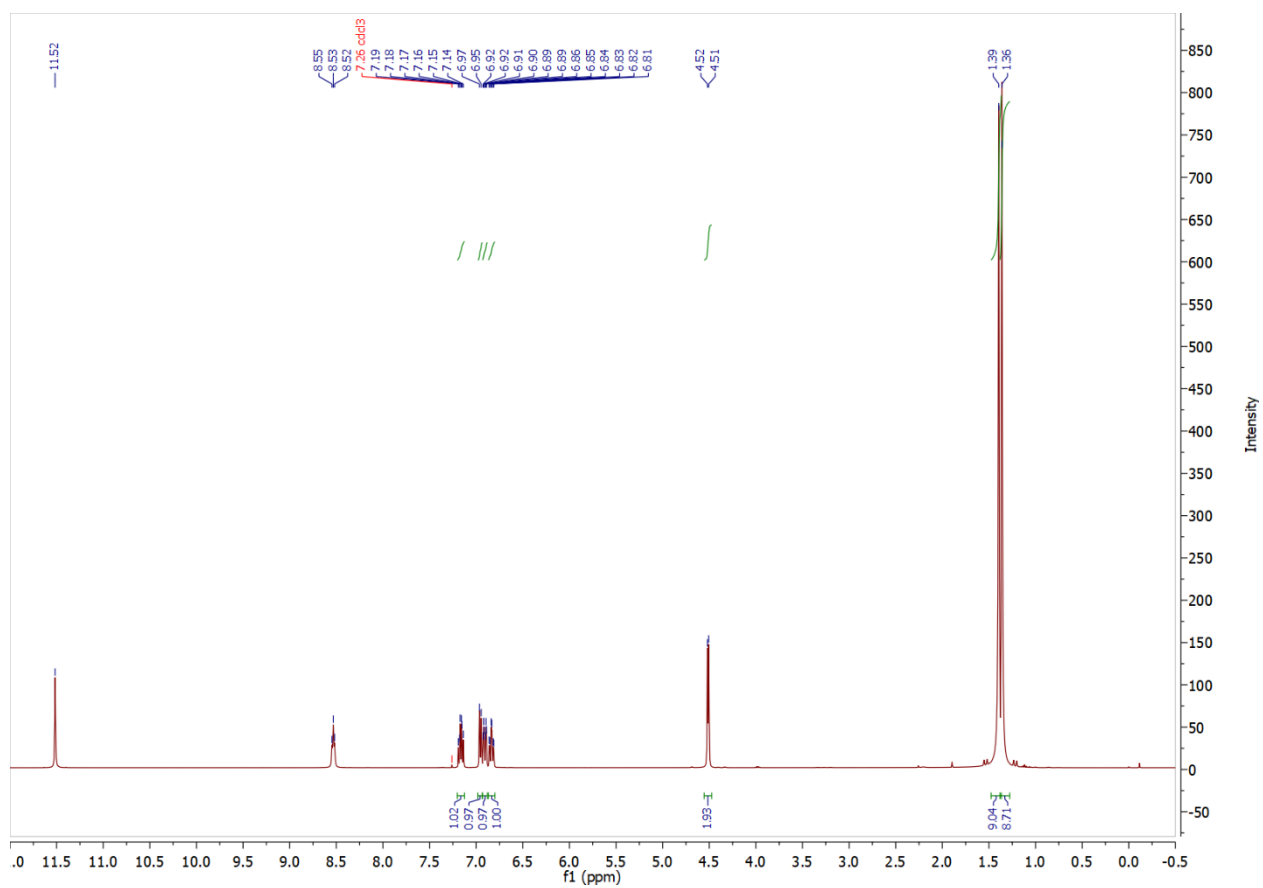

$^{13}\text{C}$  NMR for **3a-Boc**

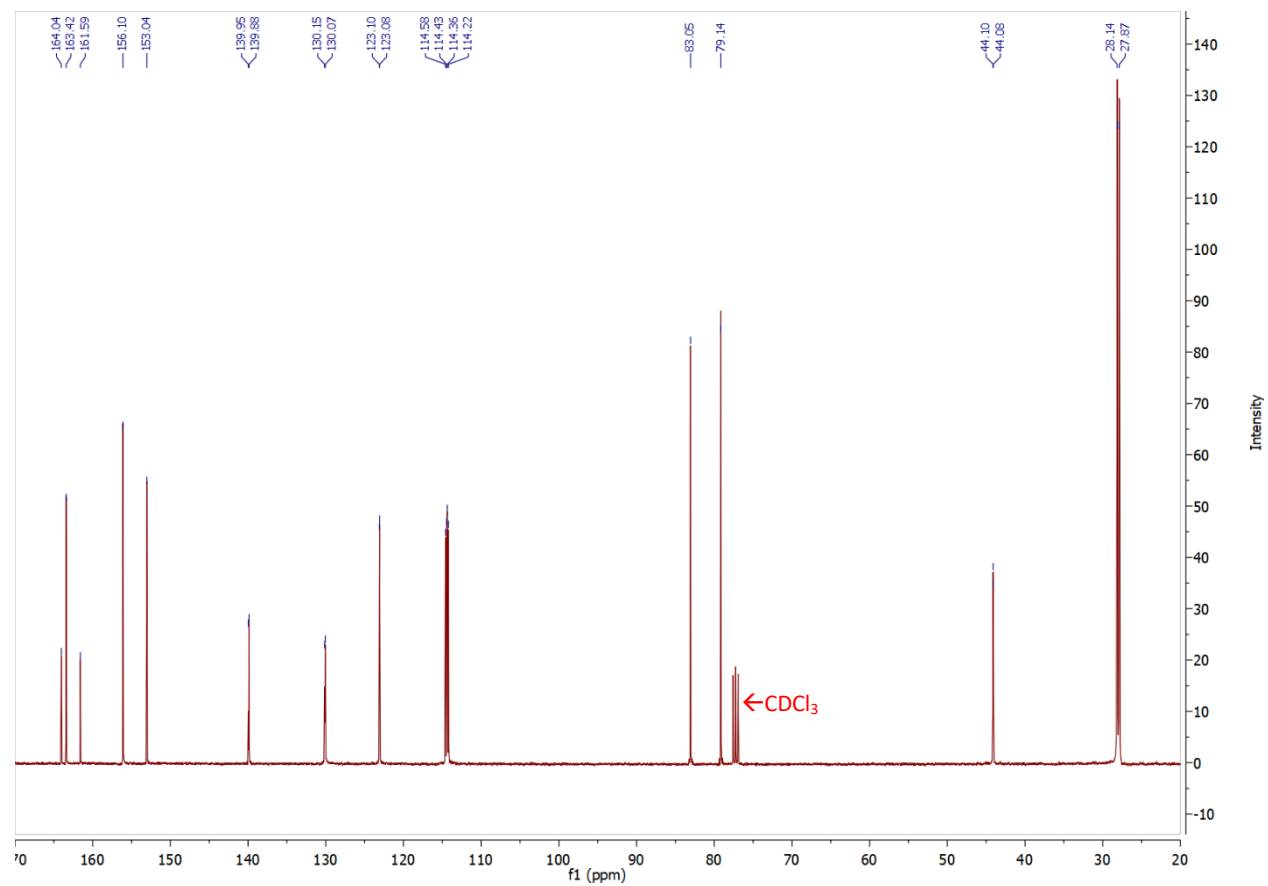

$^{19}\text{F}$  NMR for **3a-Boc**

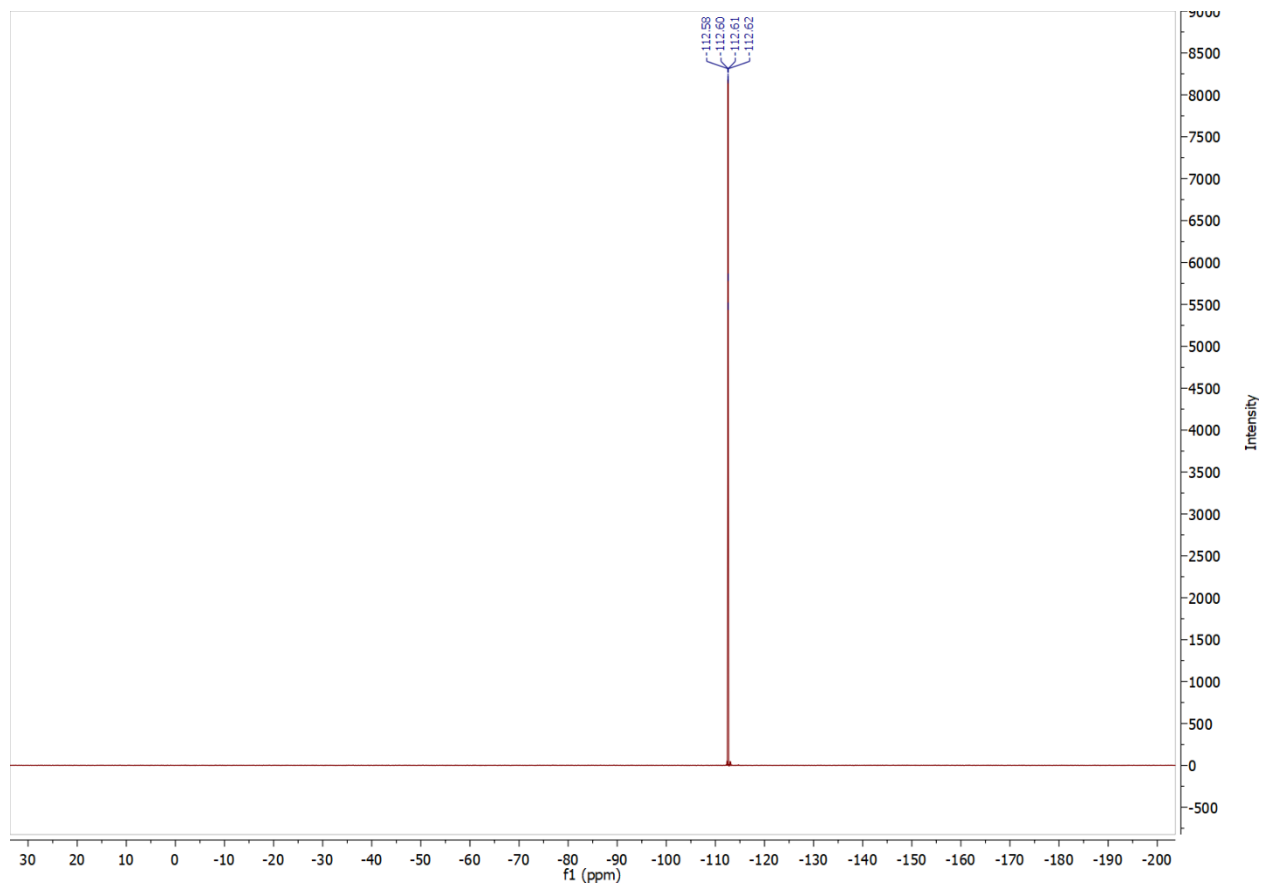

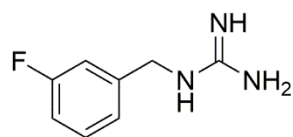

**3a**

<sup>1</sup>H NMR for **3a**

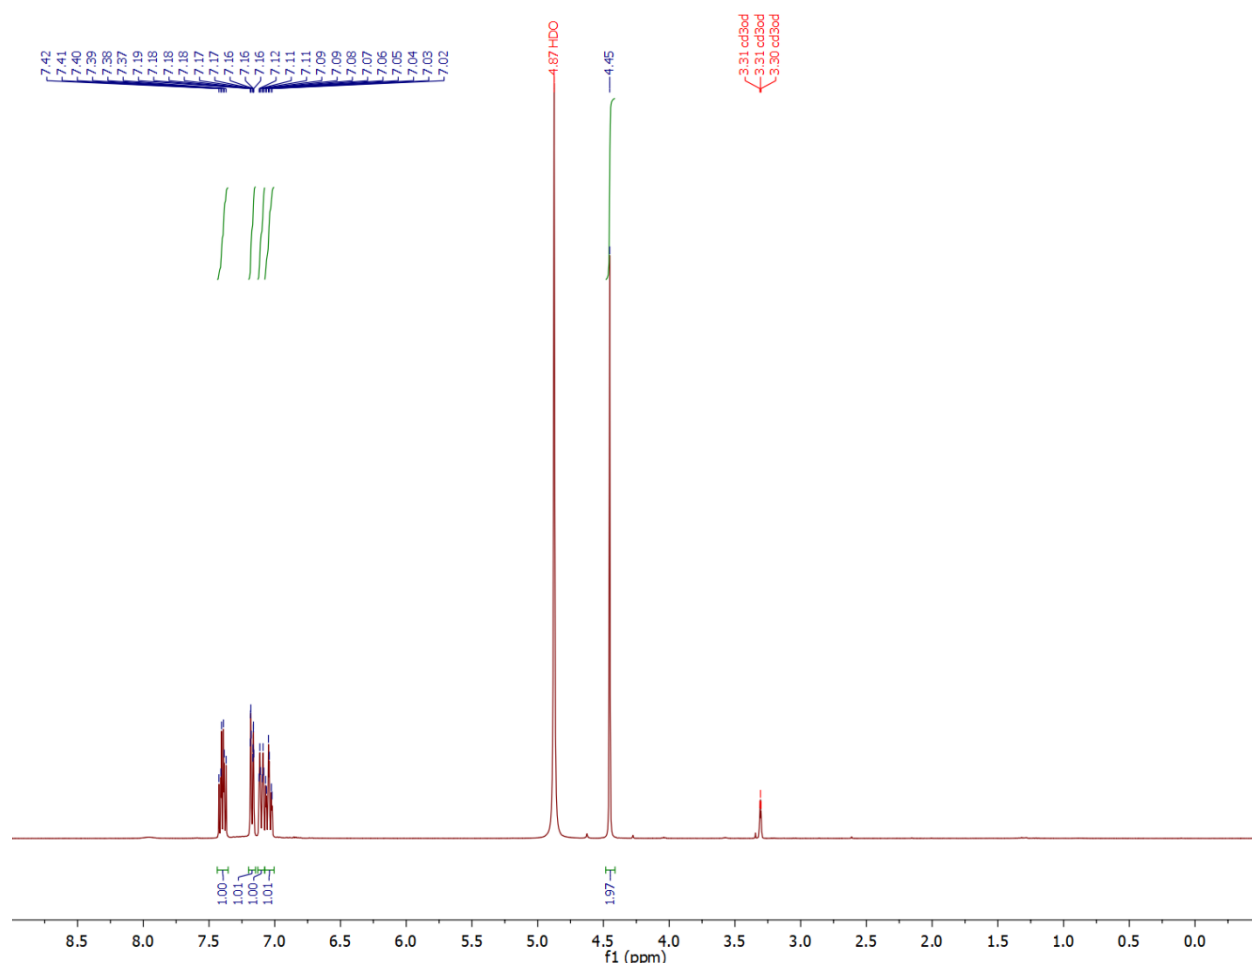

$^{13}\text{C}$  NMR for **3a**

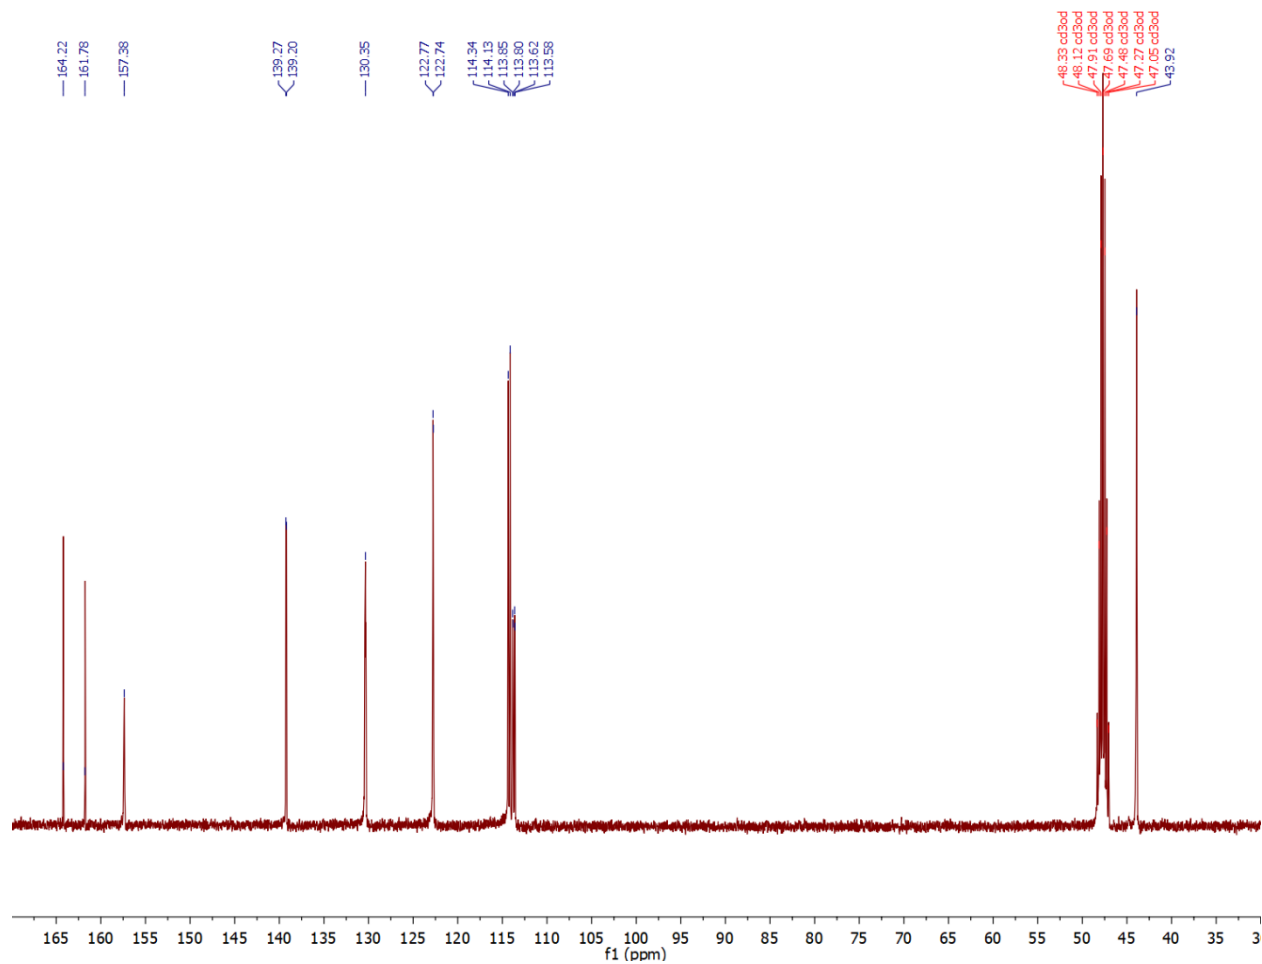

$^{19}\text{F}$  NMR for **3a**

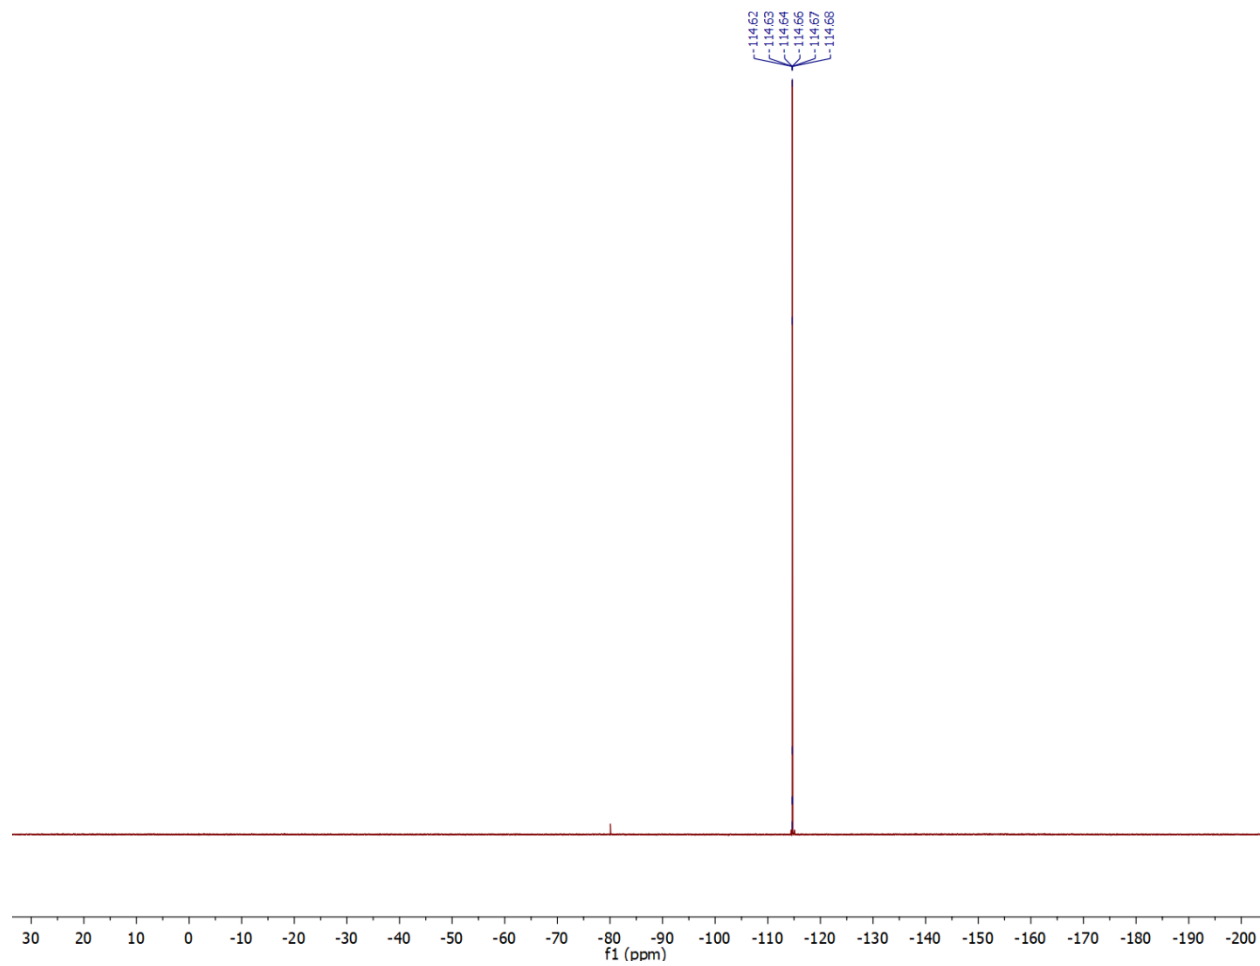

## 6.1.2 MFPG

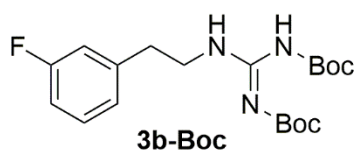

$^1\text{H}$  NMR for **3b-Boc**

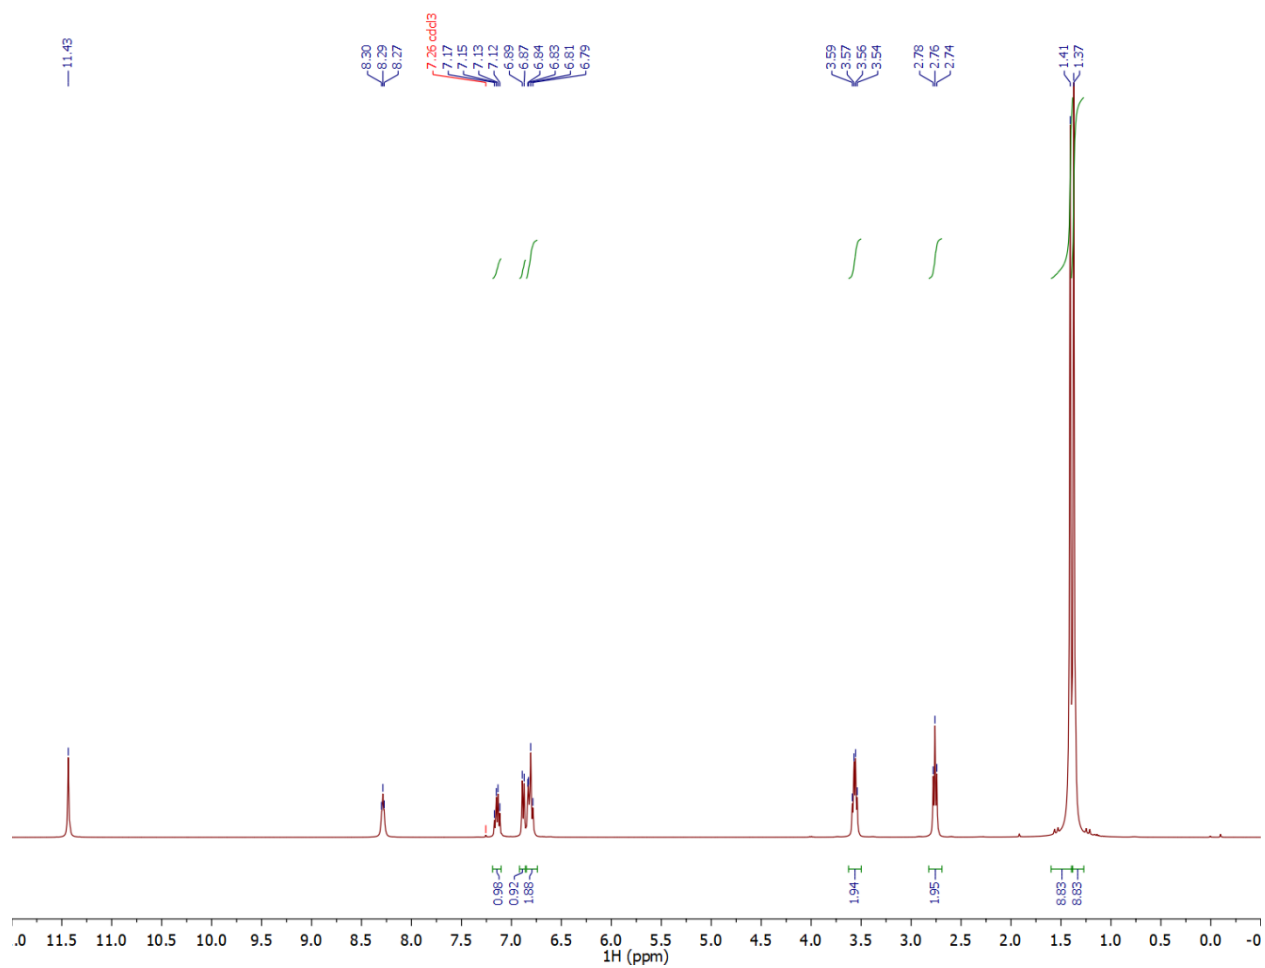



$^{13}\text{C}$  NMR for **3b-Boc**

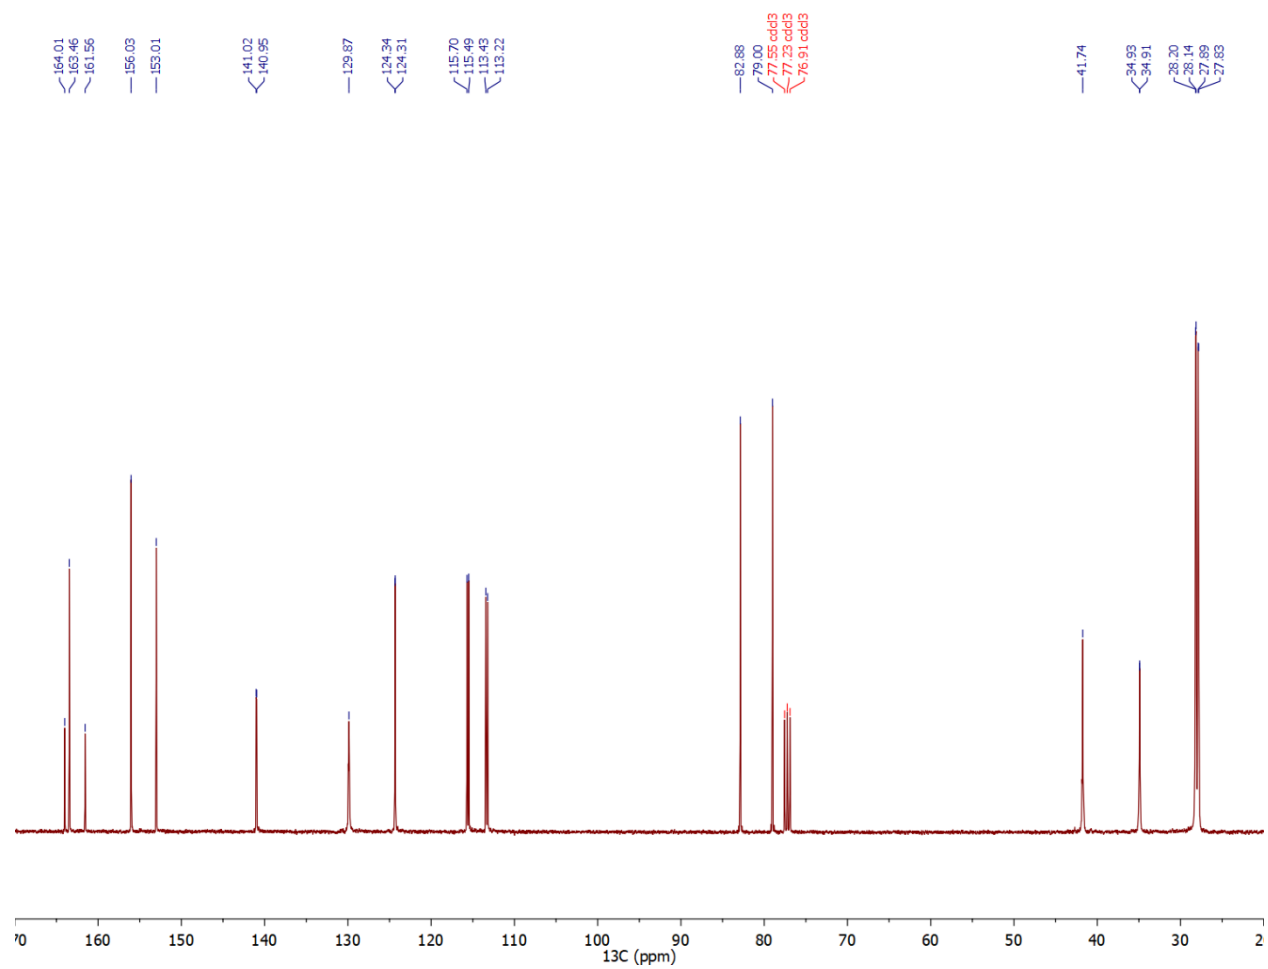

$^{19}\text{F}$  NMR for **3b-Boc**

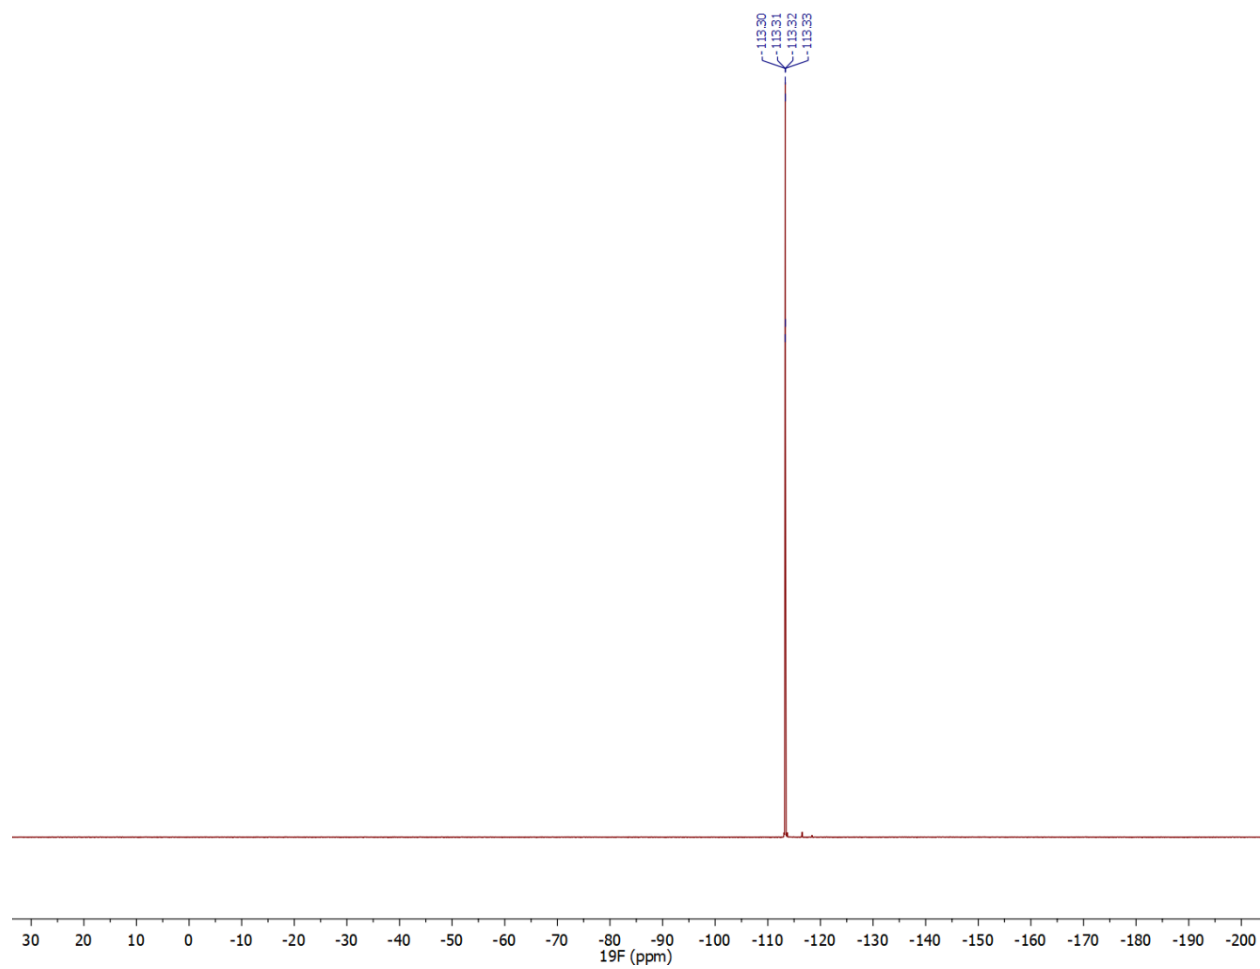

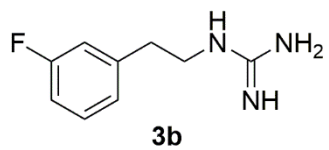

$^1\text{H}$  NMR for **3b**

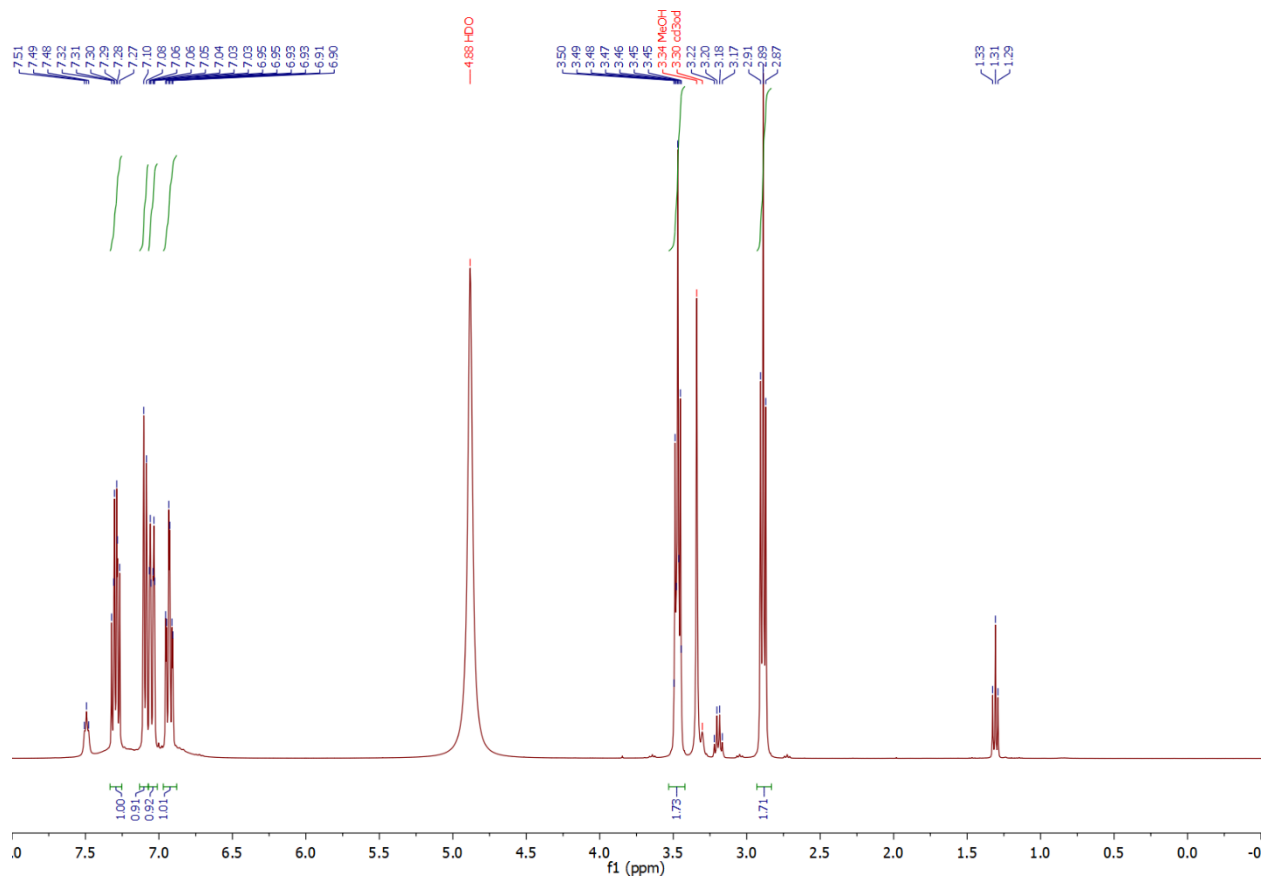

$^{13}\text{C}$  NMR for **3b**

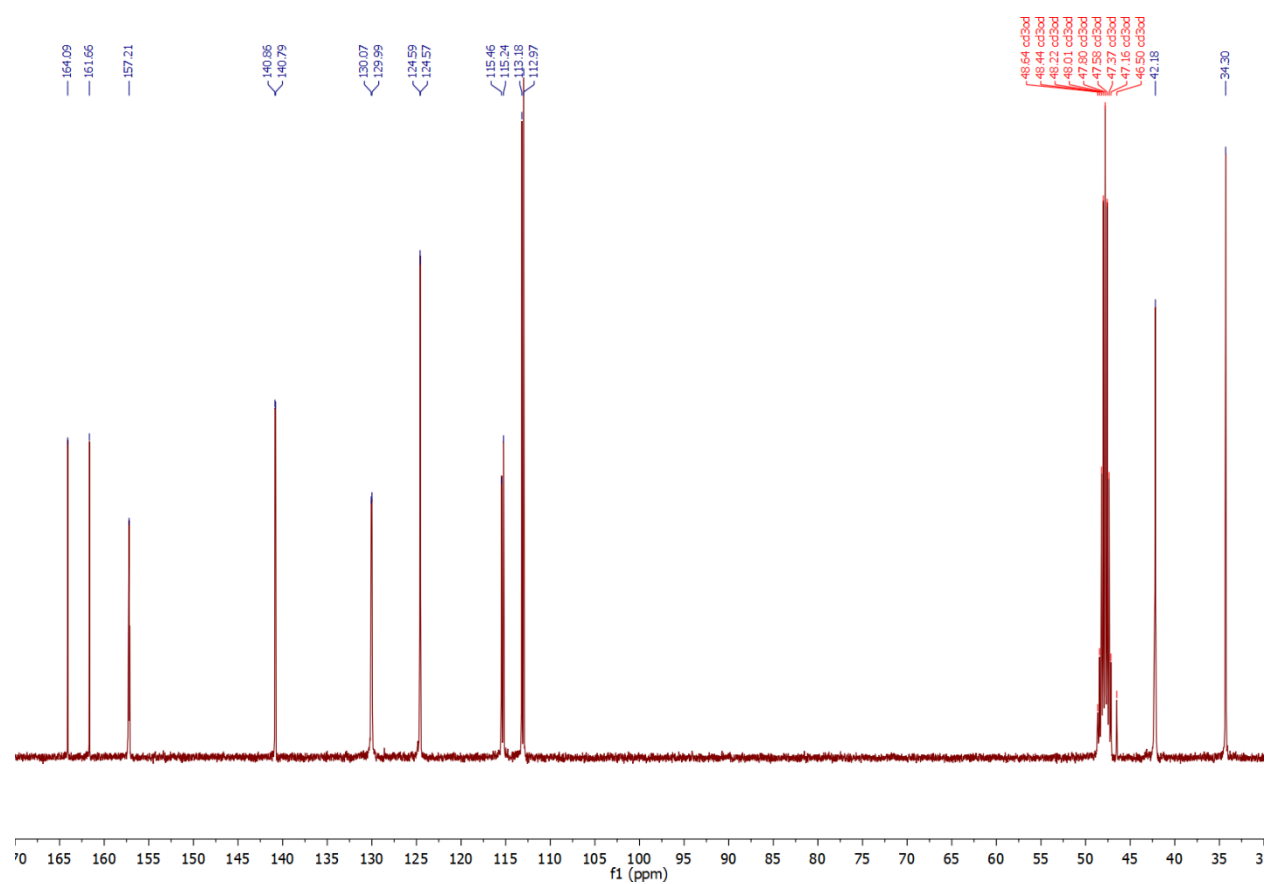

$^{19}\text{F}$  NMR for **3b**

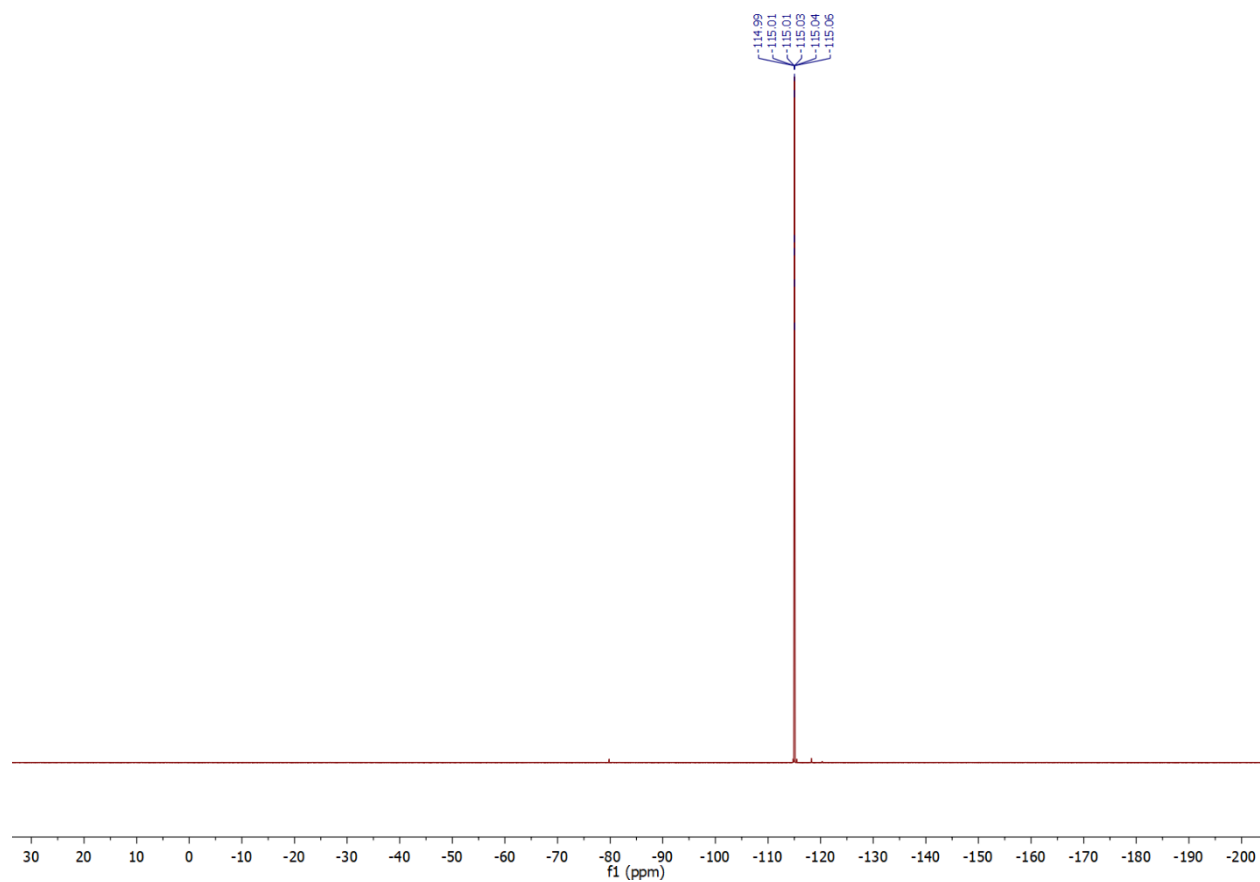

### 6.1.3 5F-MHPG

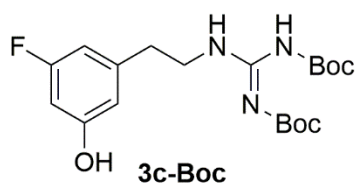

$^1\text{H}$  NMR for **3c-Boc**

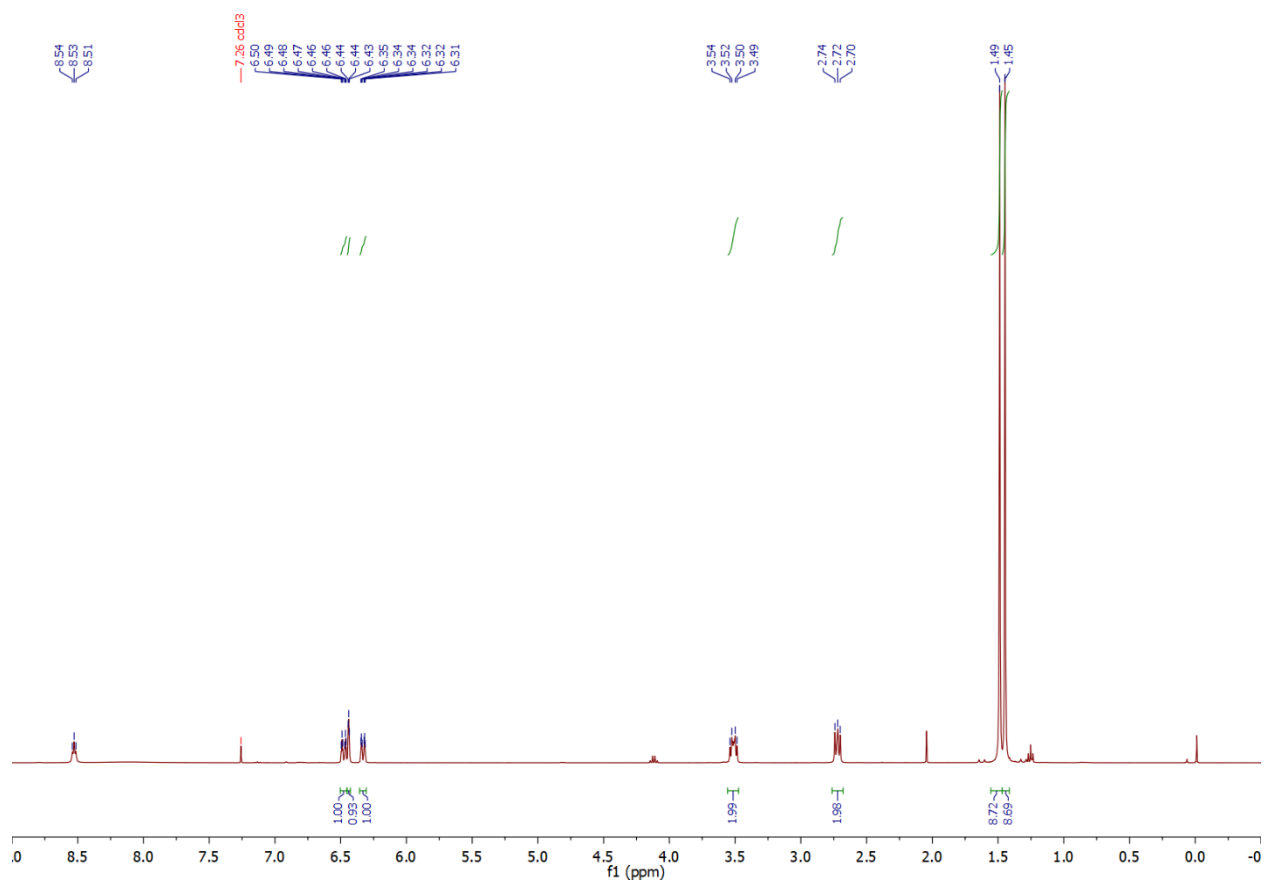

$^{13}\text{C}$  NMR for **3b-Boc**

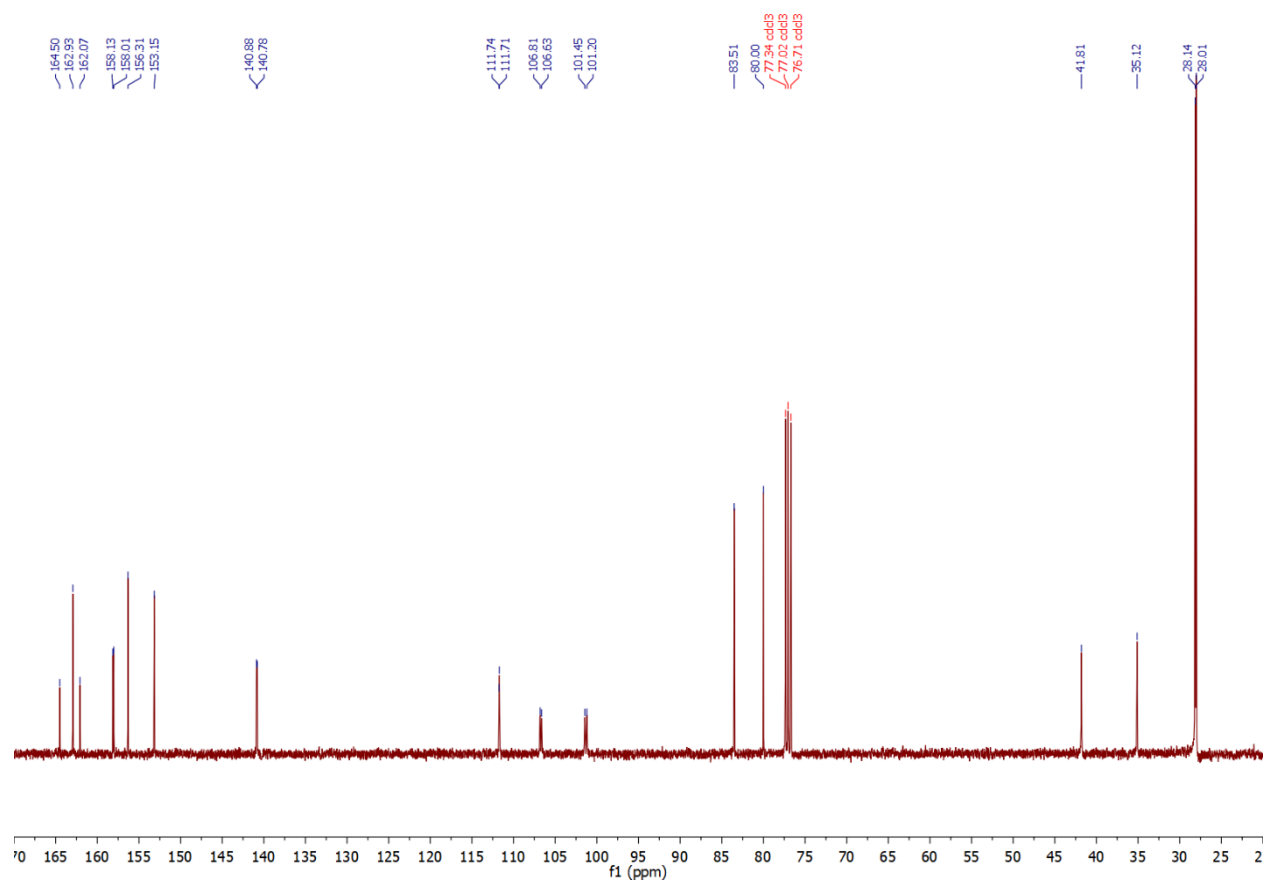

$^{19}\text{F}$  NMR for **3b-Boc**

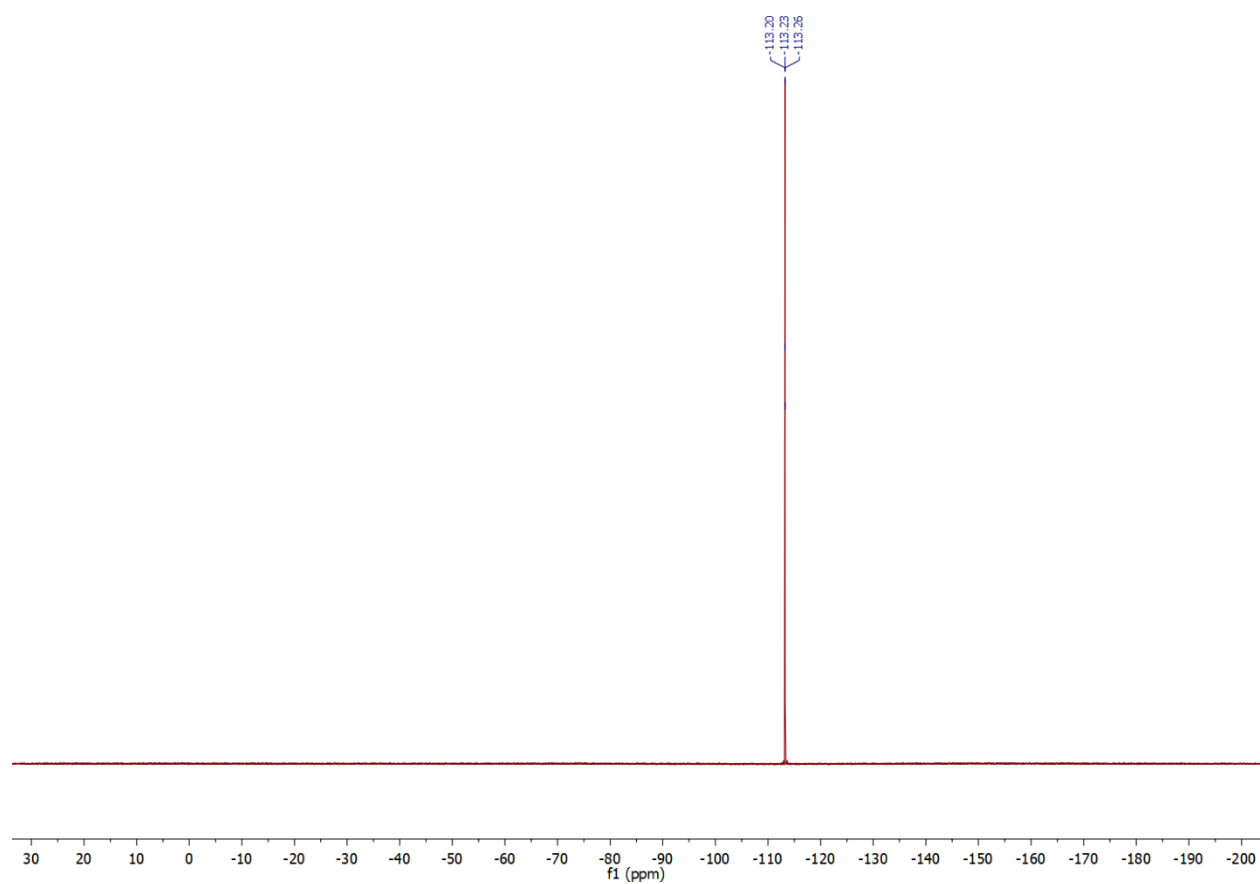



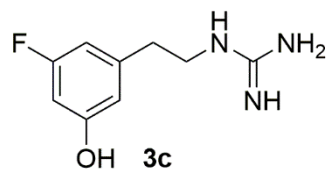

<sup>1</sup>H NMR for **3c**

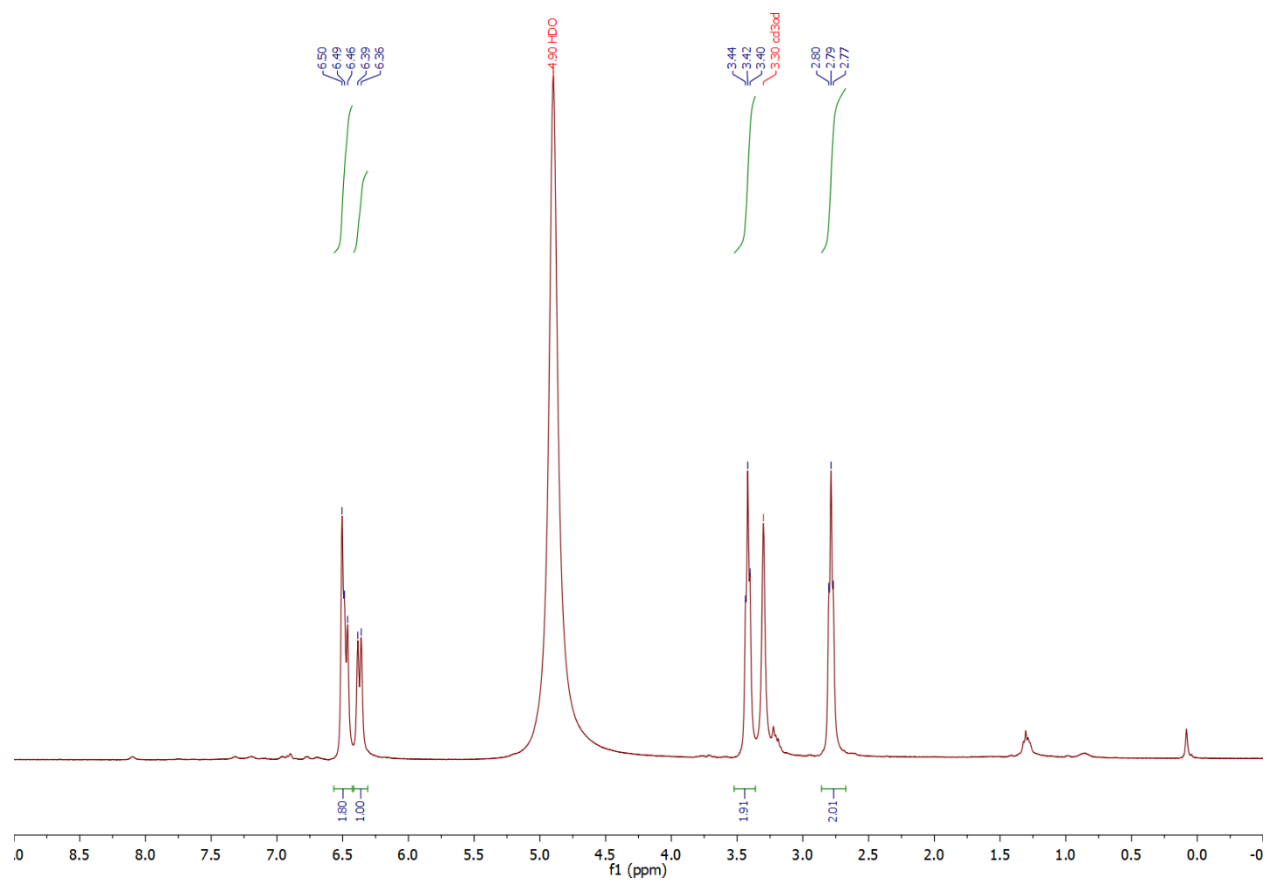

$^{13}\text{C}$  NMR for **3c**

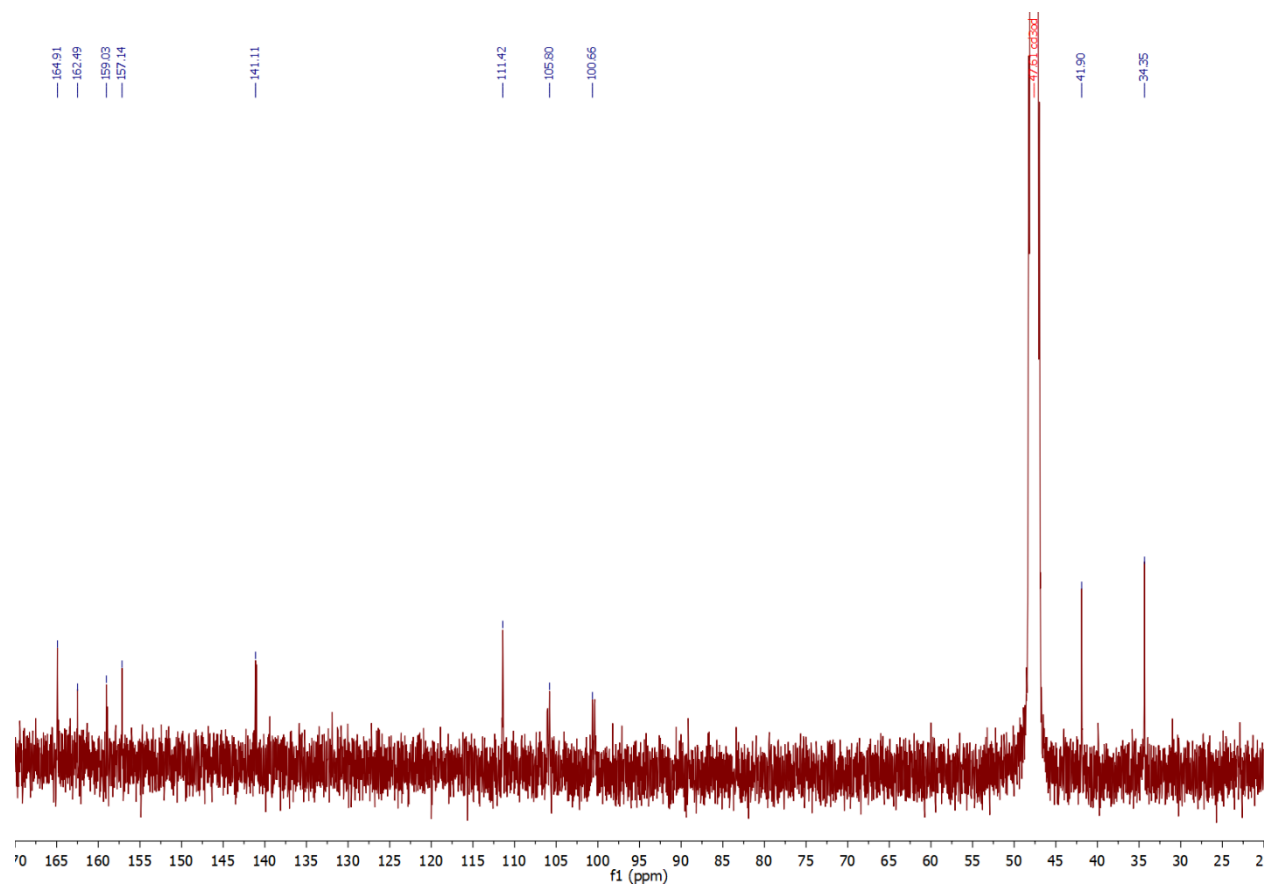

$^{19}\text{F}$  NMR for **3c**

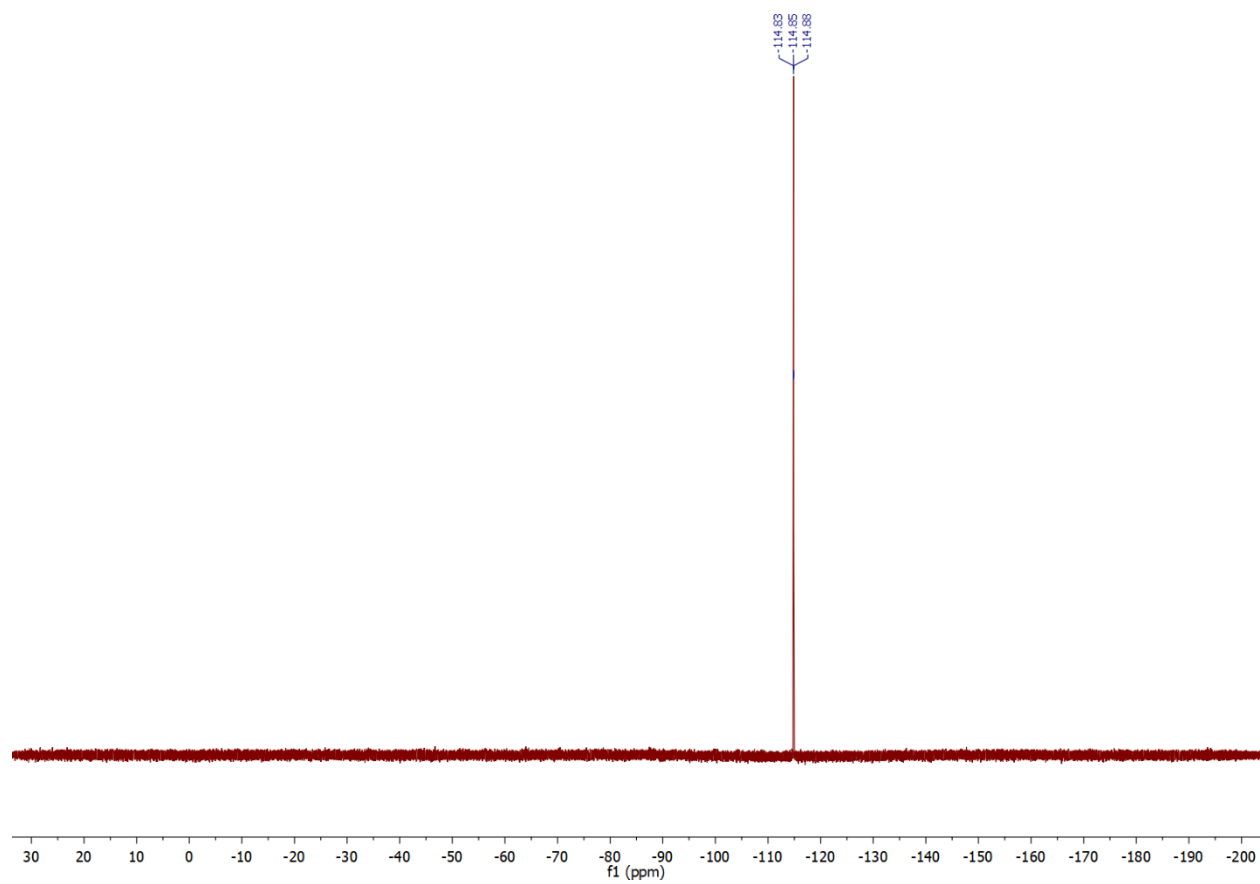

## 6.1.4 DOPG

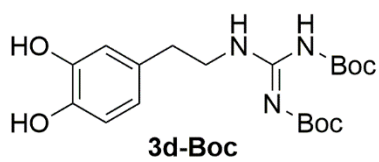

$^1\text{H}$  NMR for **3d-Boc**

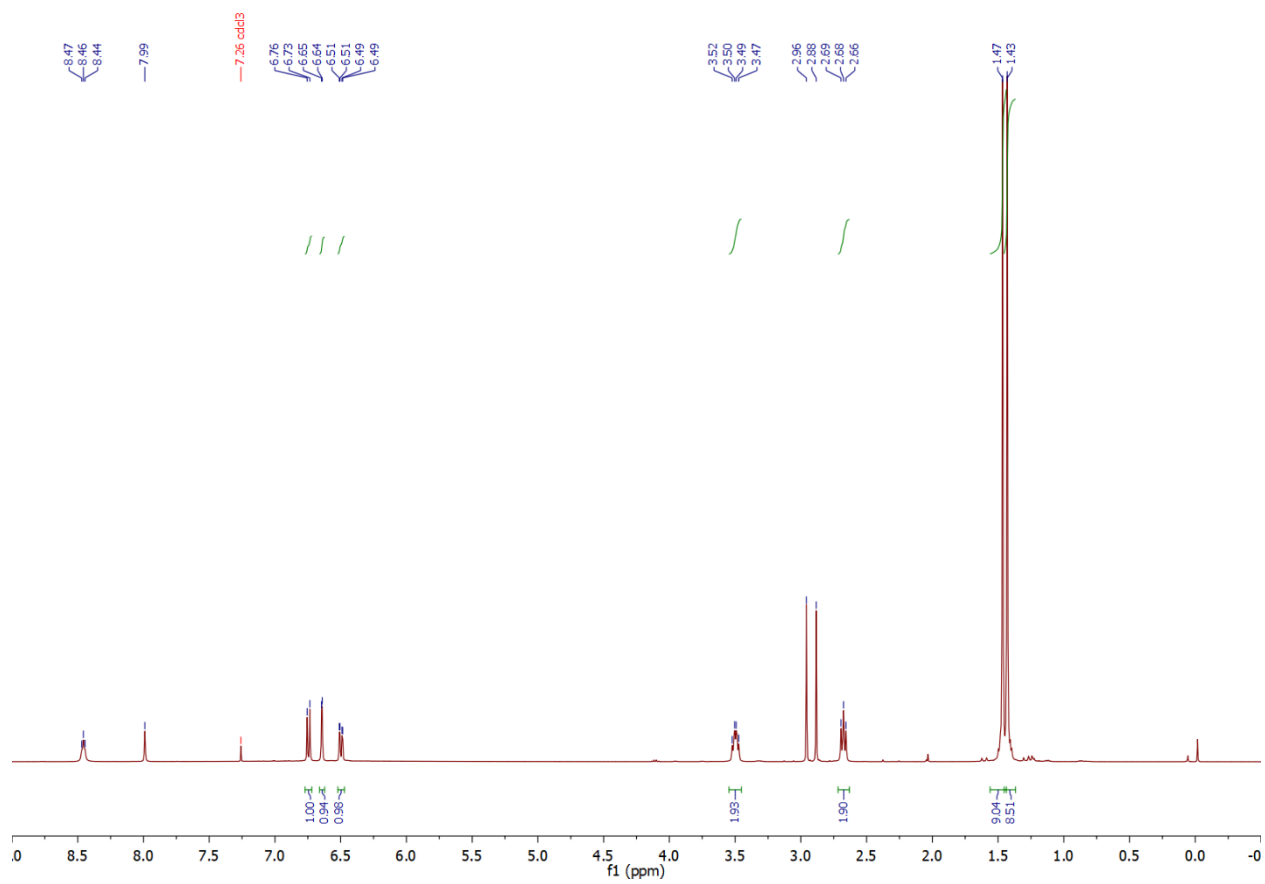

$^{13}\text{C}$  NMR for **3d-Boc**

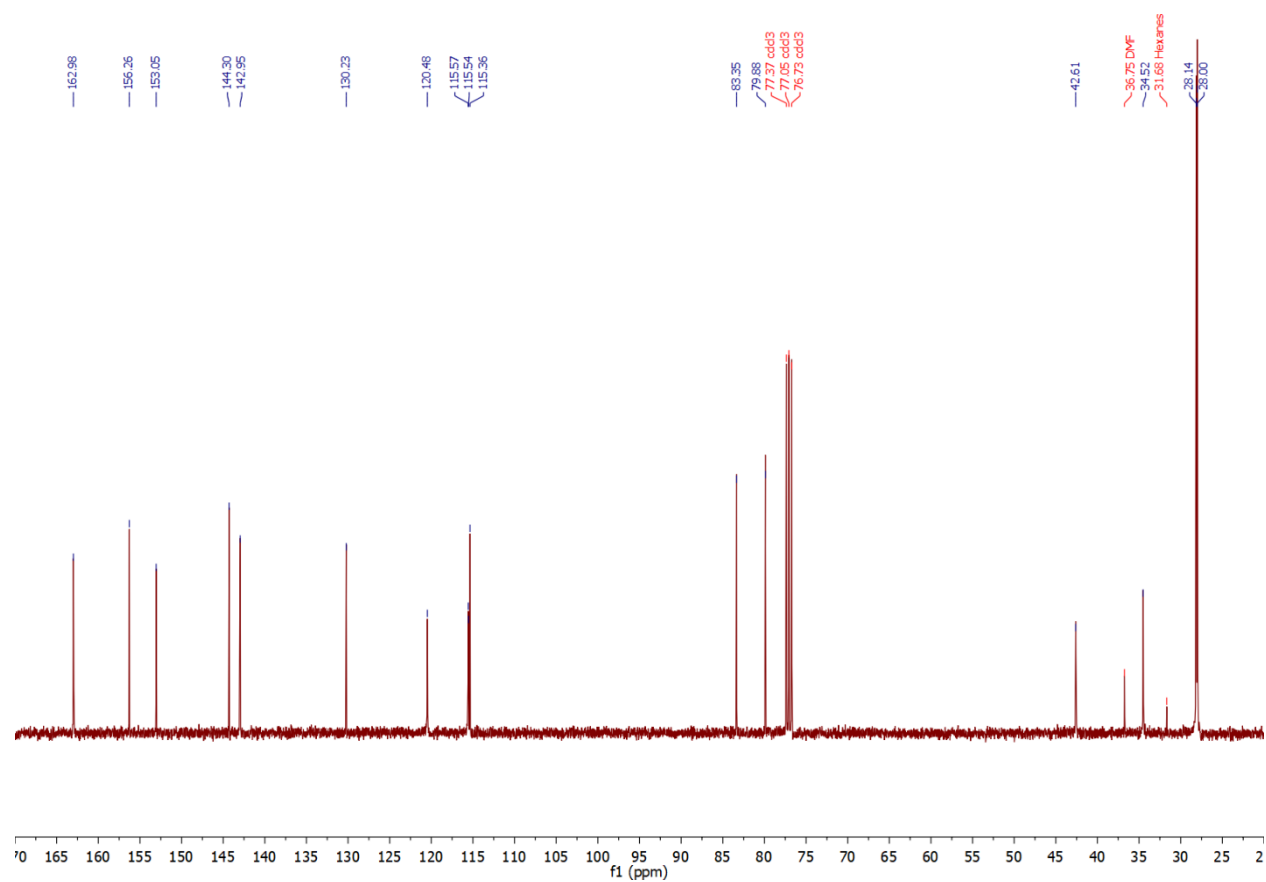

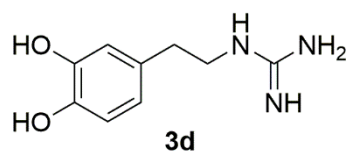

$^1\text{H}$  NMR for **3d**

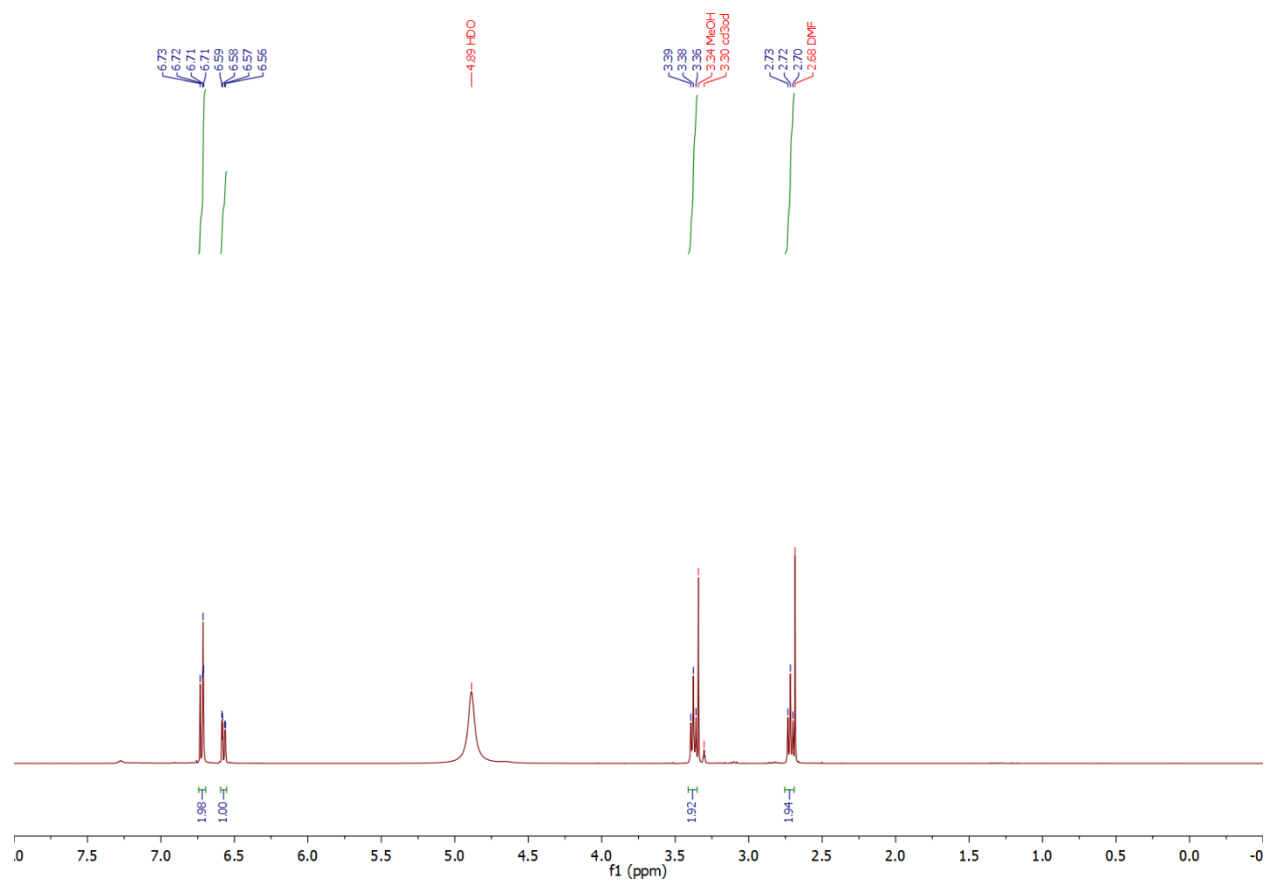

$^{13}\text{C}$  NMR for **3d**

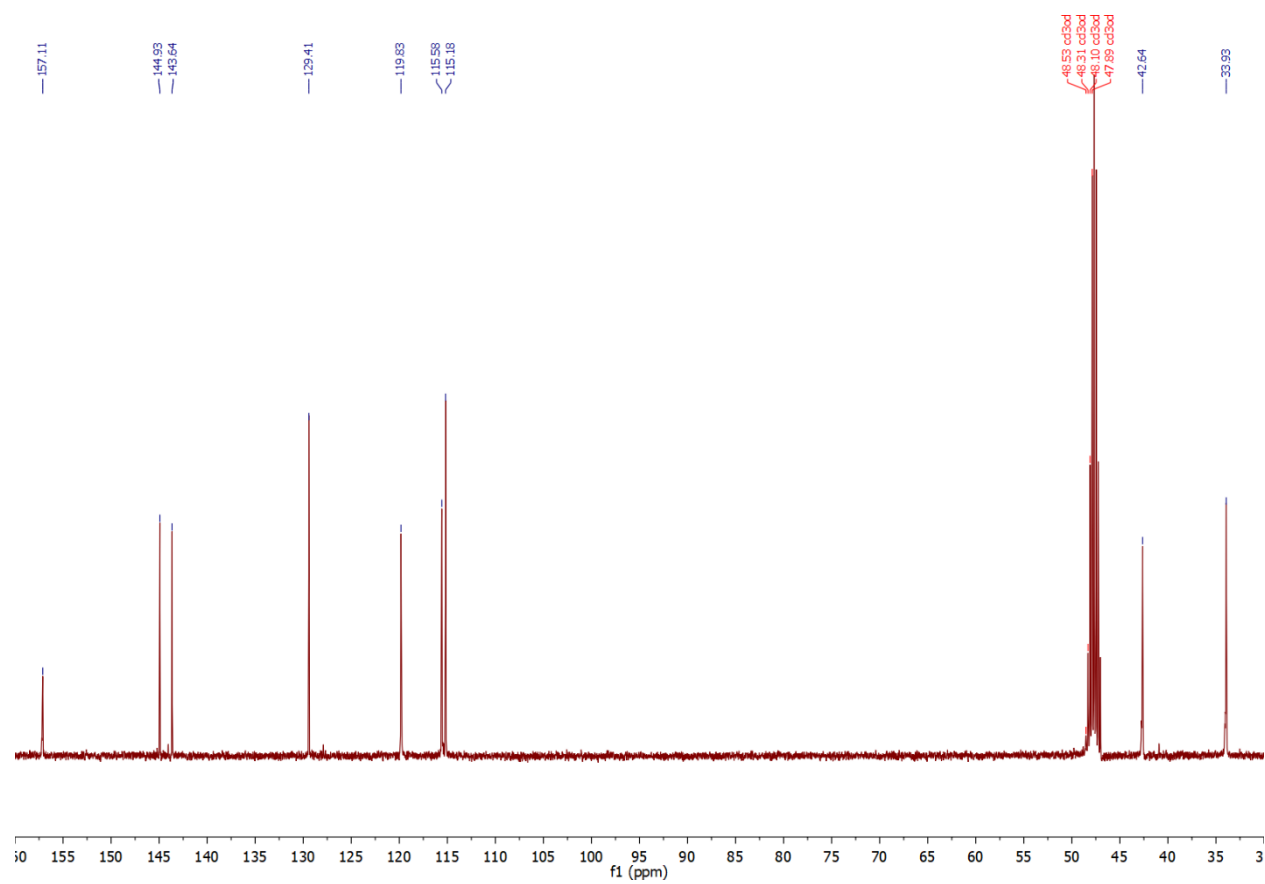

## 6.1.5 GMO

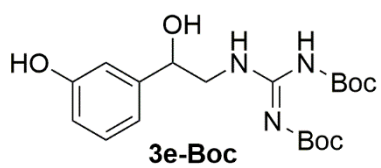

$^1\text{H}$  NMR for **3e-Boc**

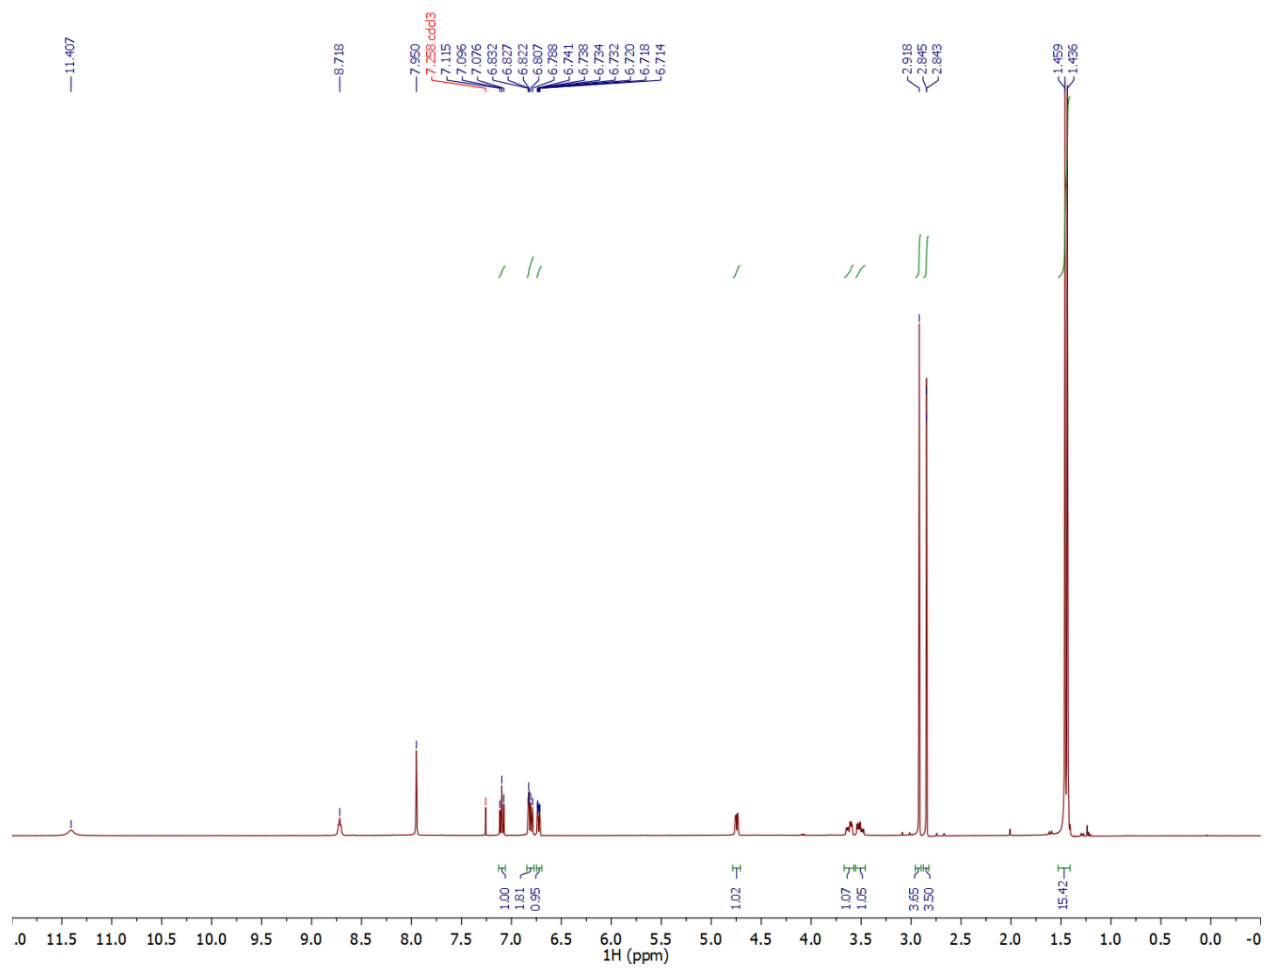



<sup>13</sup>C NMR for **3e-Boc**

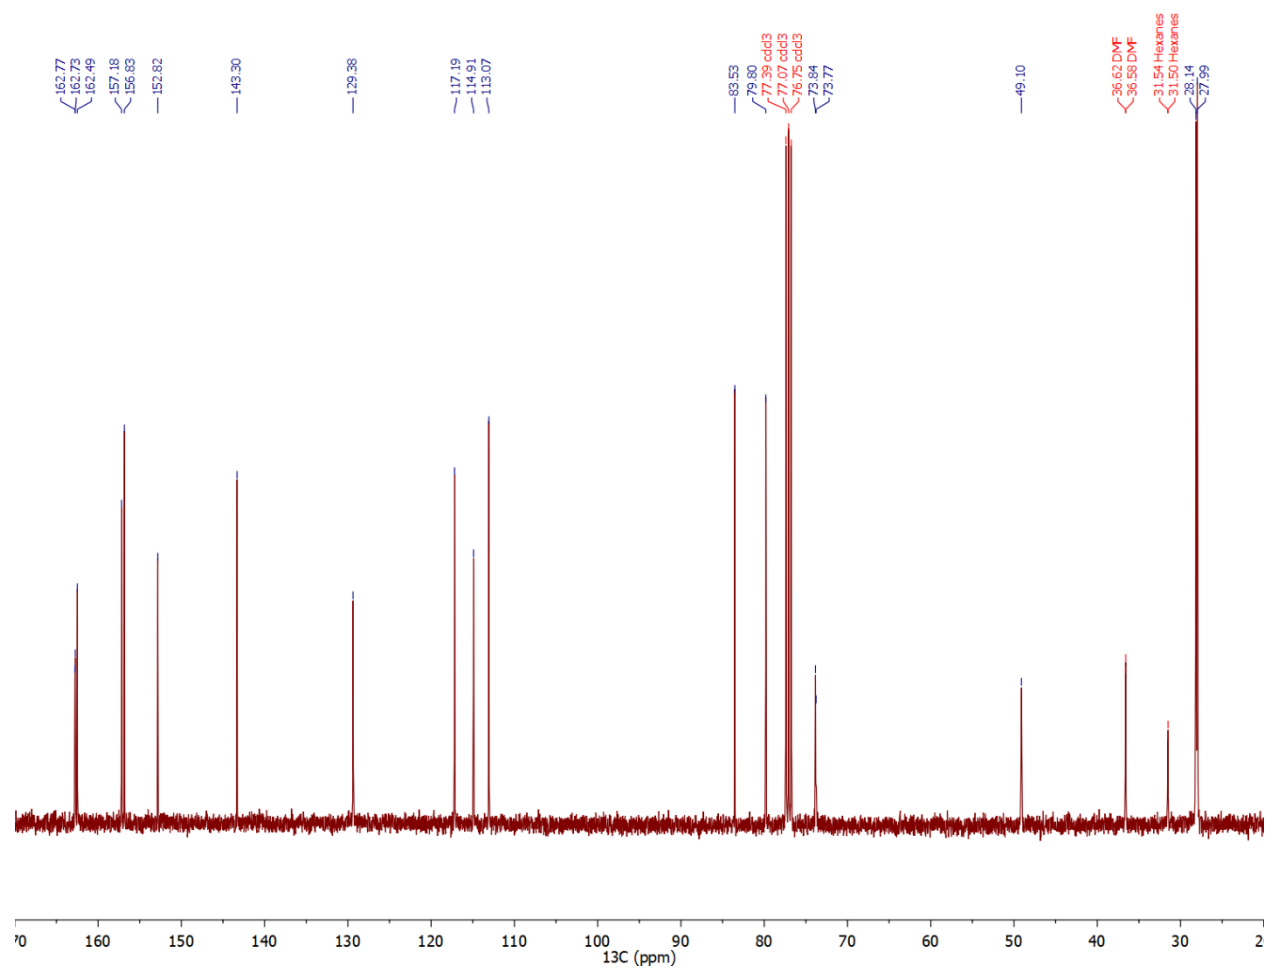

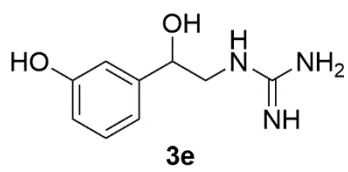

$^1\text{H}$  NMR for **3e**

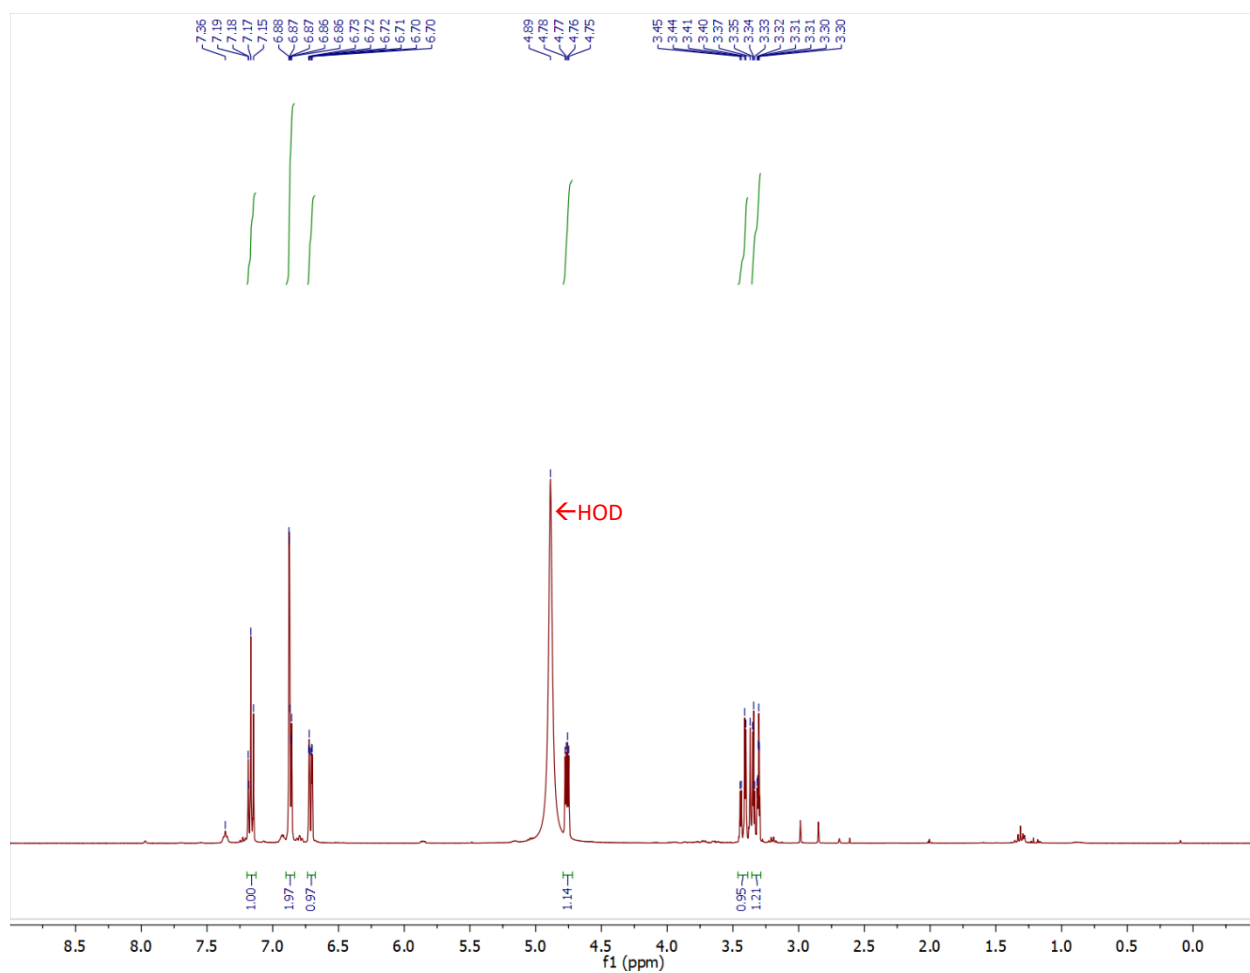

$^{13}\text{C}$  NMR for **3e**

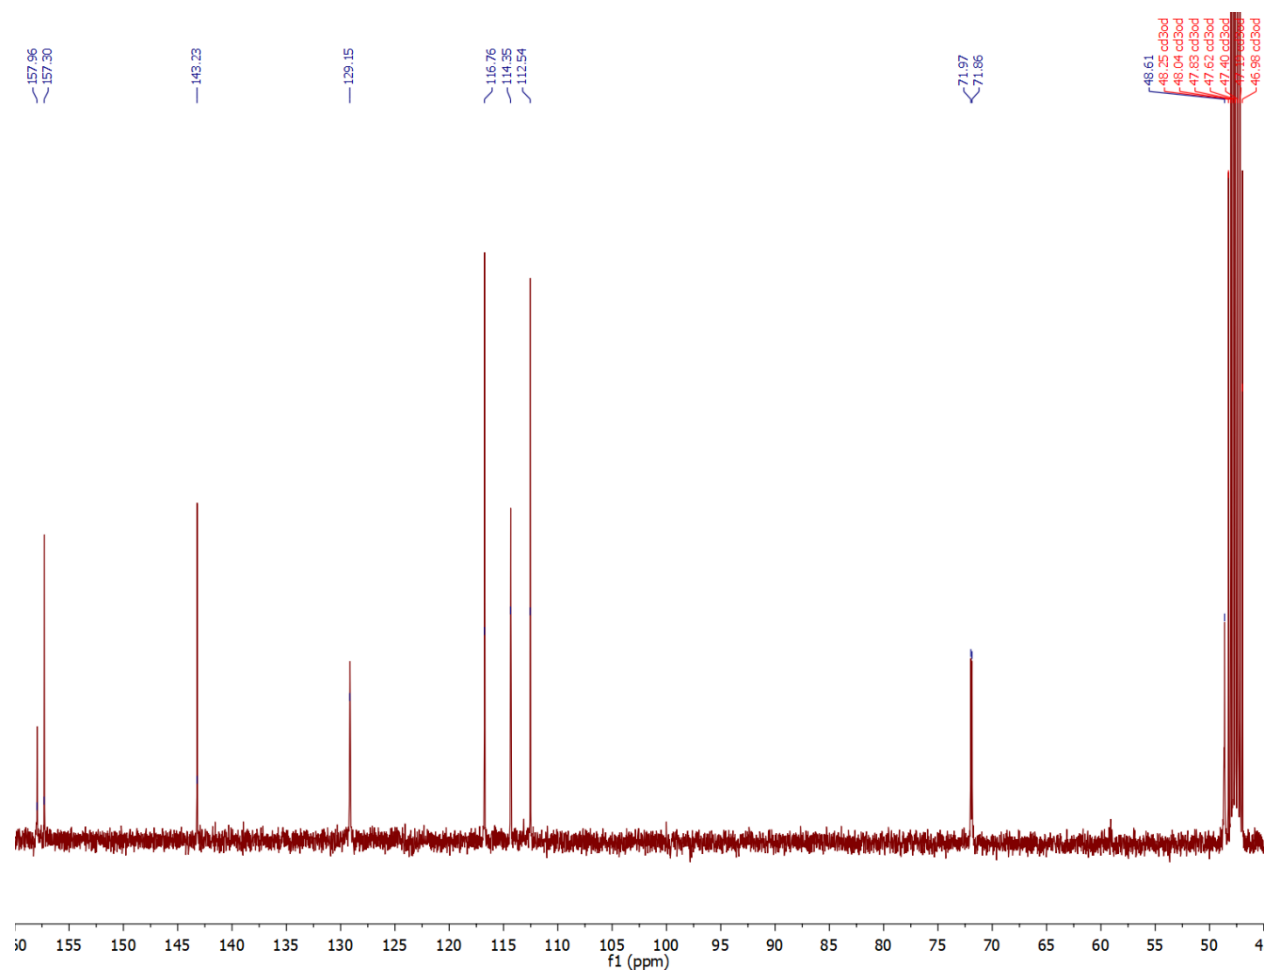

### 6.1.6 MIBG

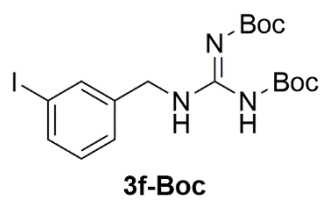

$^1\text{H}$  NMR for **3f-Boc**

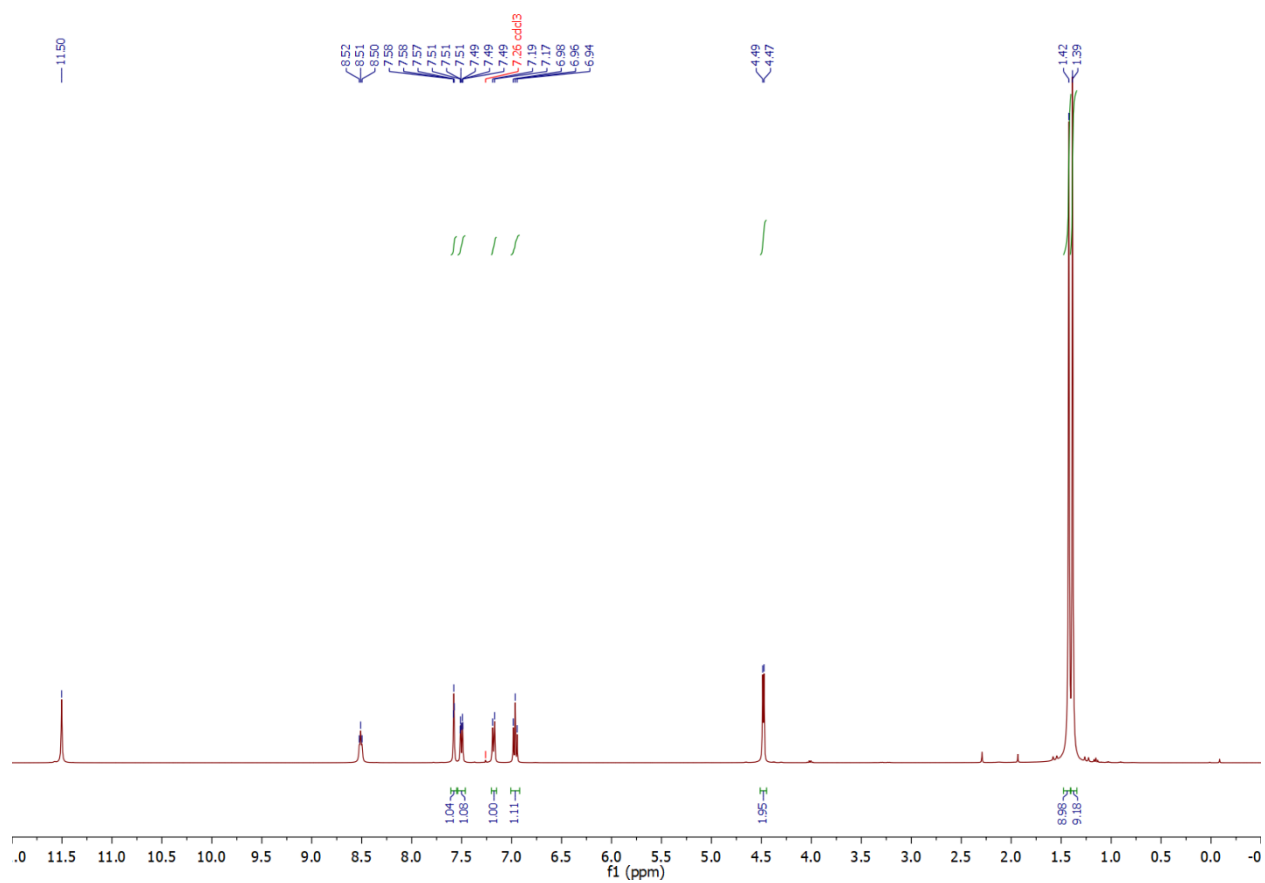

$^{13}\text{C}$  NMR for **3f-Boc**

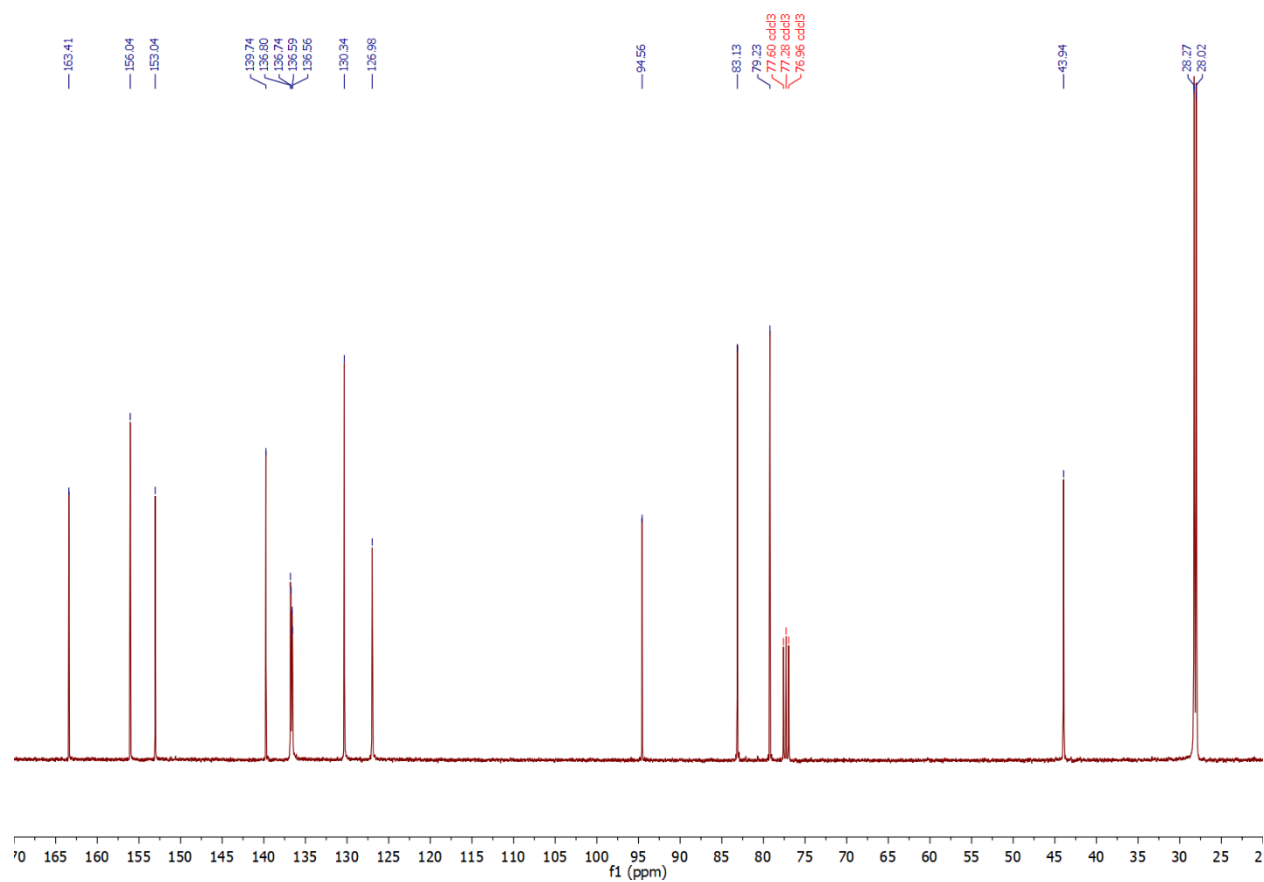

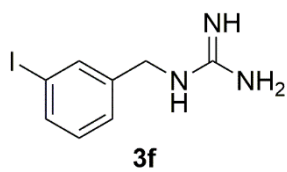

$^1\text{H}$  NMR for **3f**

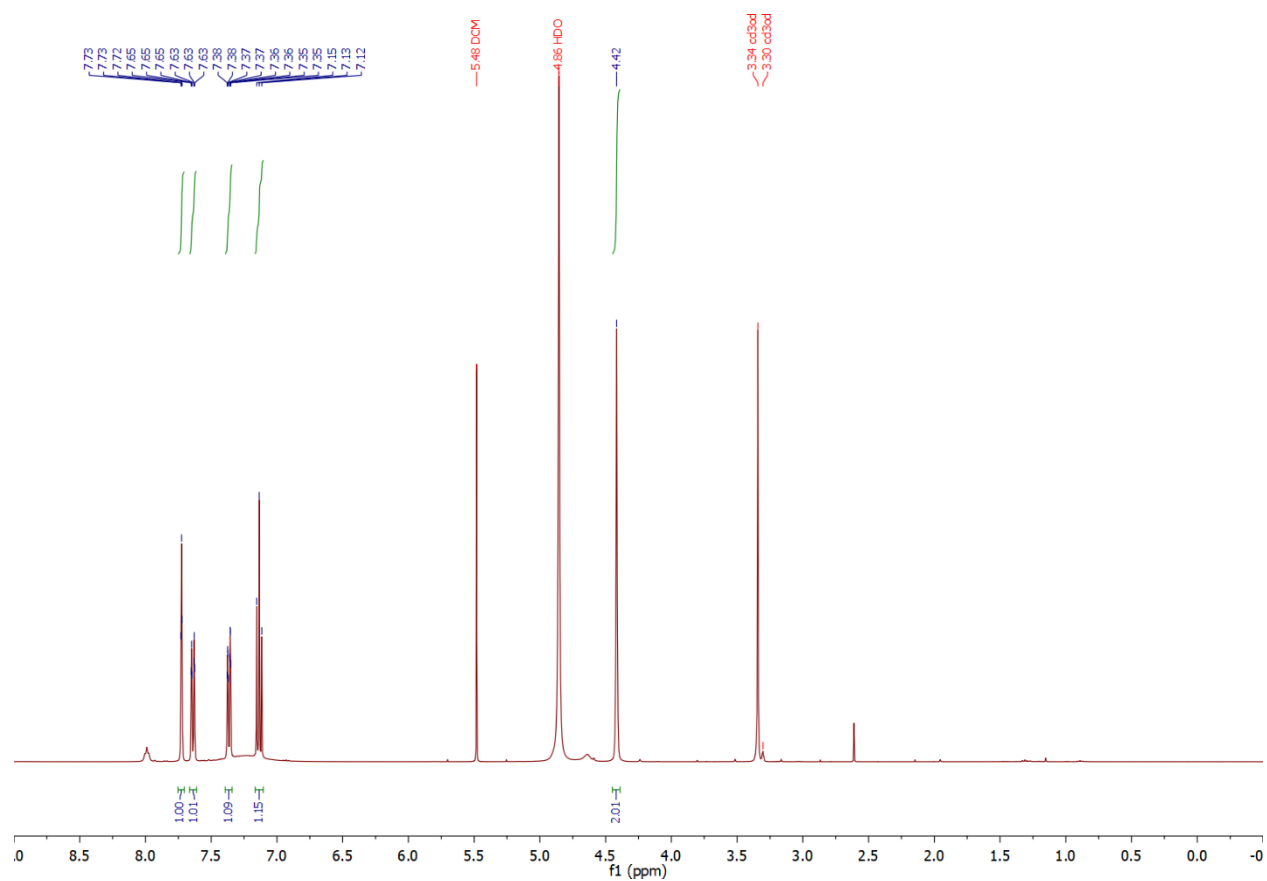

$^{13}\text{C}$  NMR for **3f**

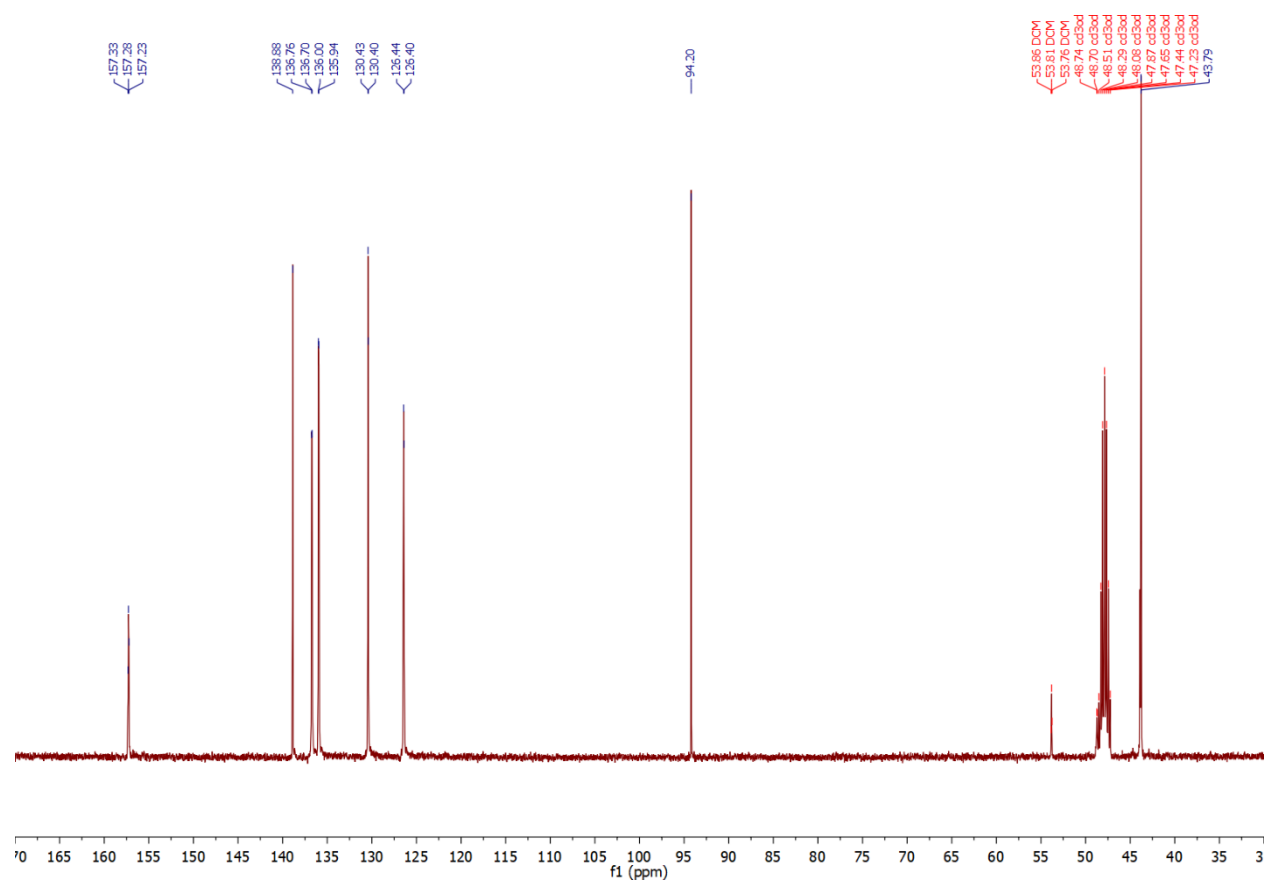

## 6.1.7 HTG

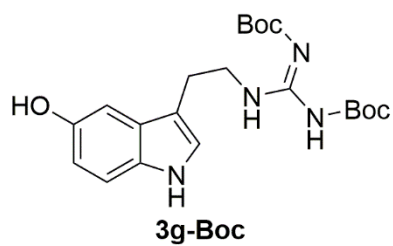

$^1\text{H}$  NMR for **3g-Boc**

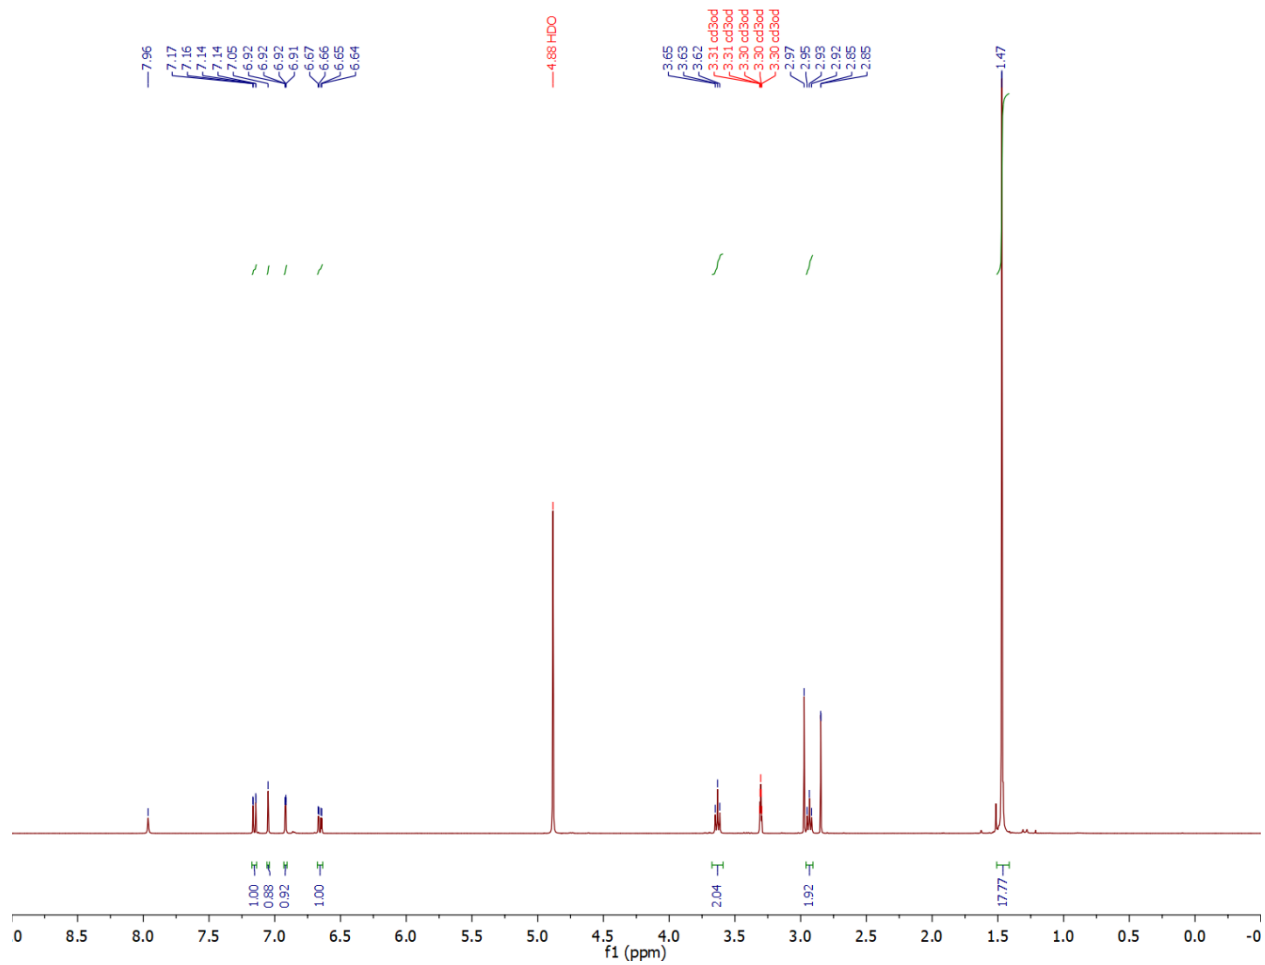



$^{13}\text{C}$  NMR for **3g-Boc**

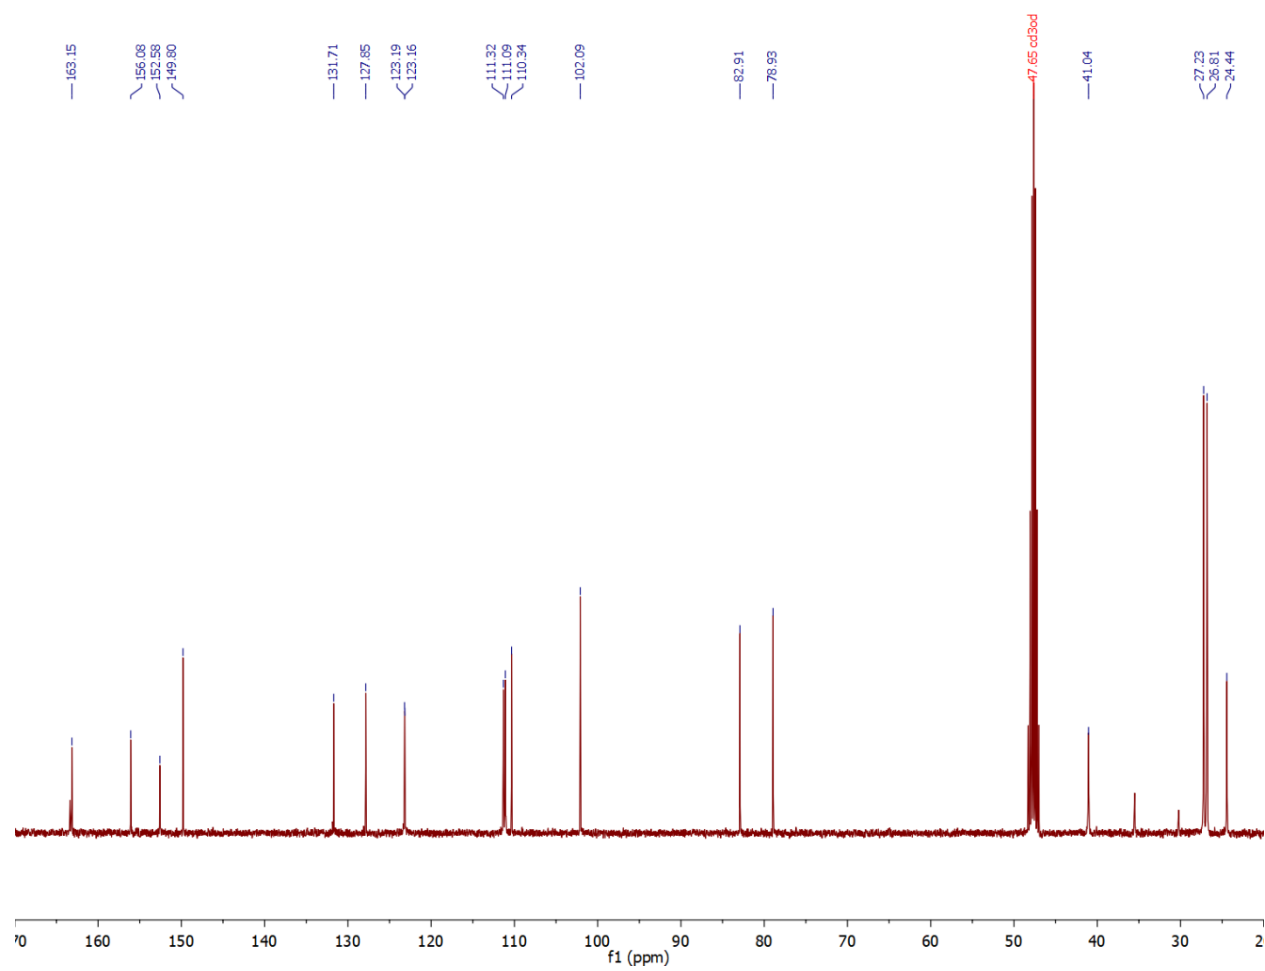

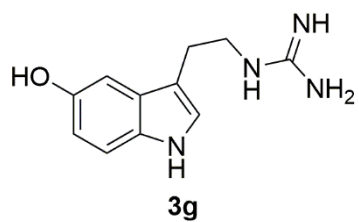

<sup>1</sup>H NMR for **3g**

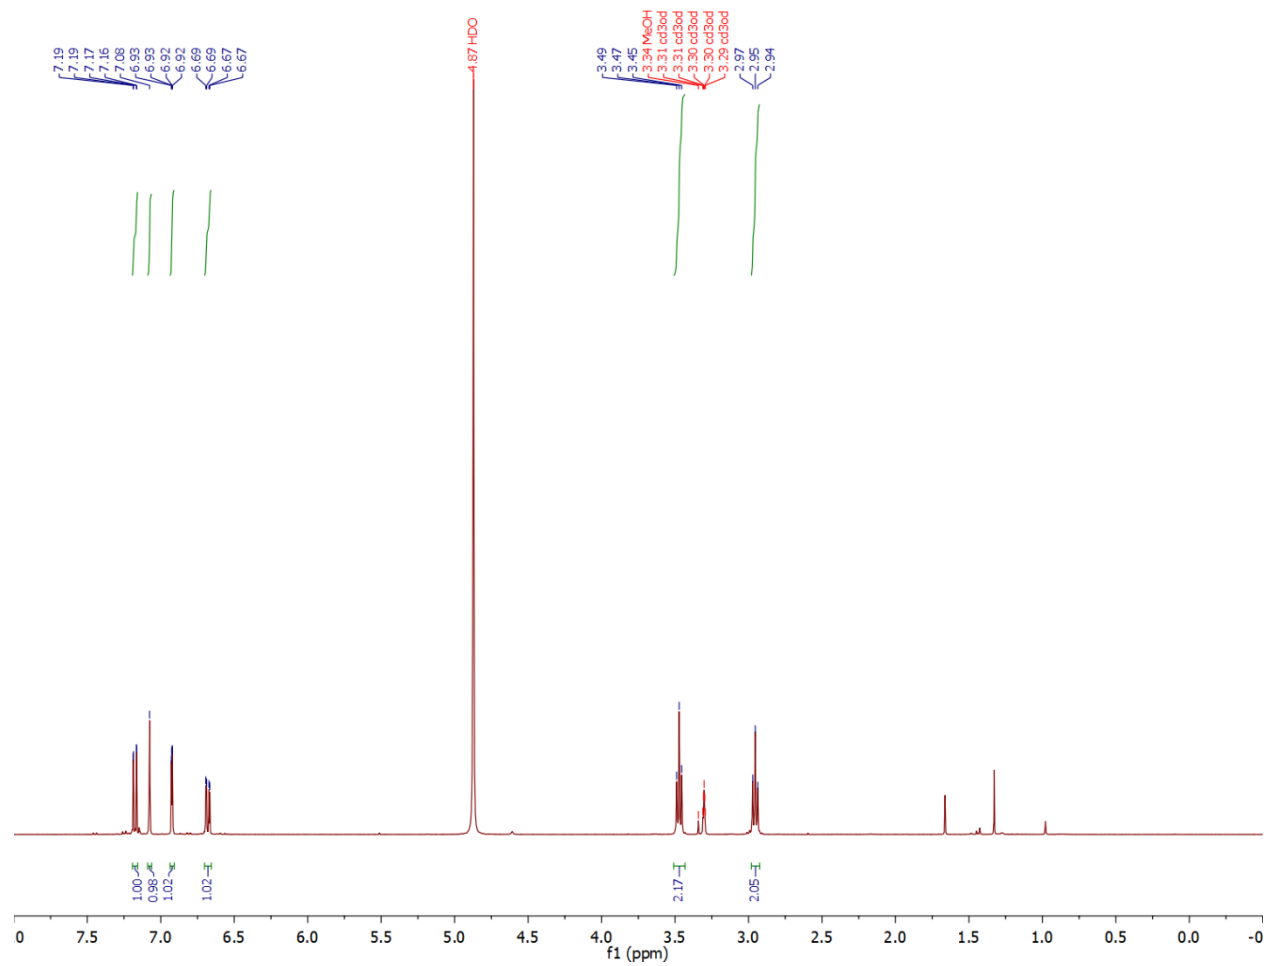

$^{13}\text{C}$  NMR for **3g**

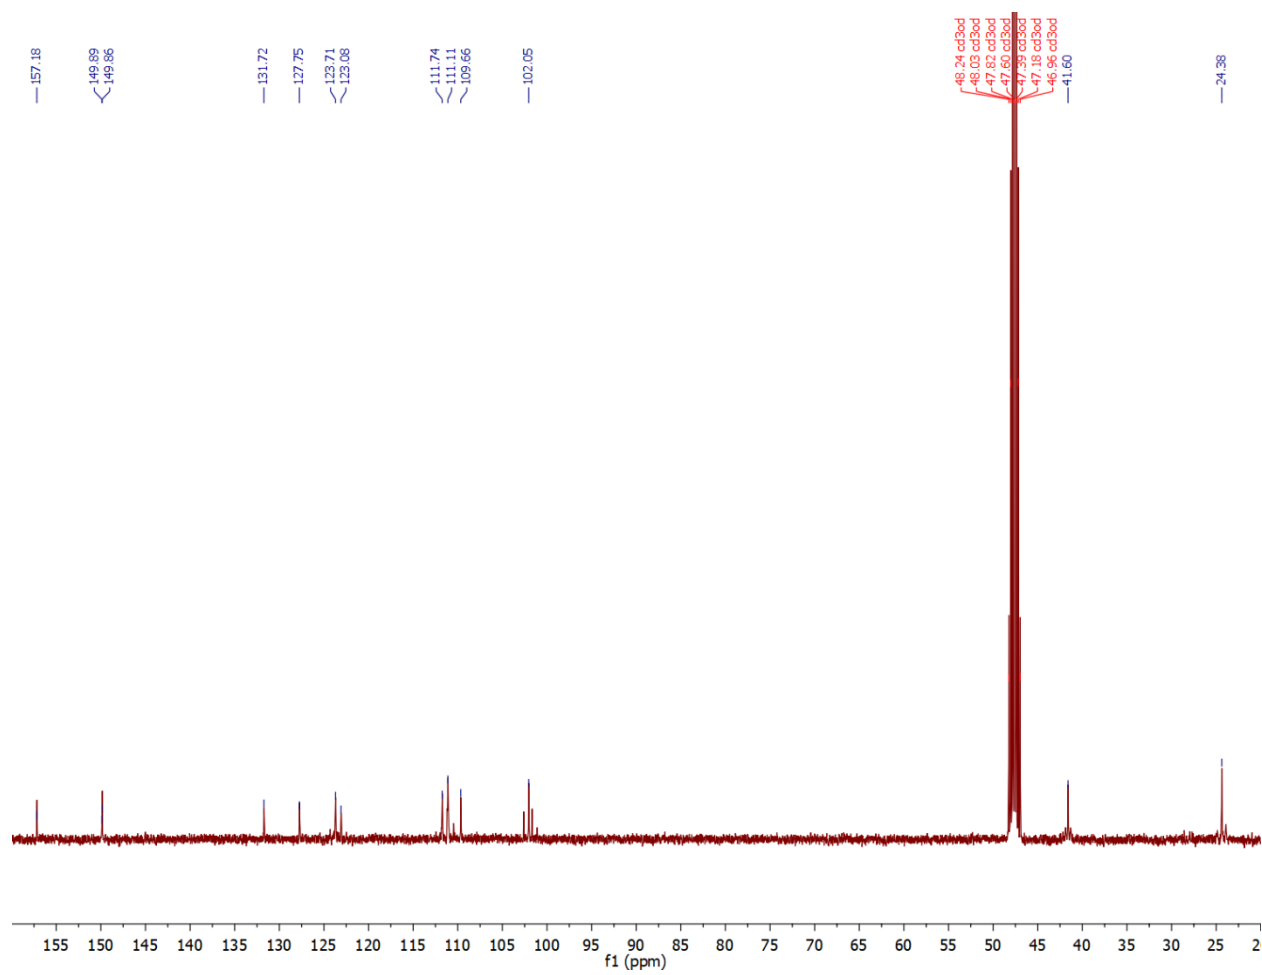

## 6.1.8 IEG

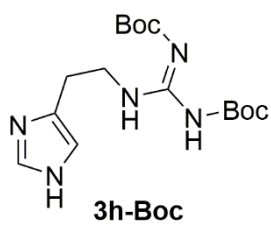

$^1\text{H}$  NMR for **3h-Boc**

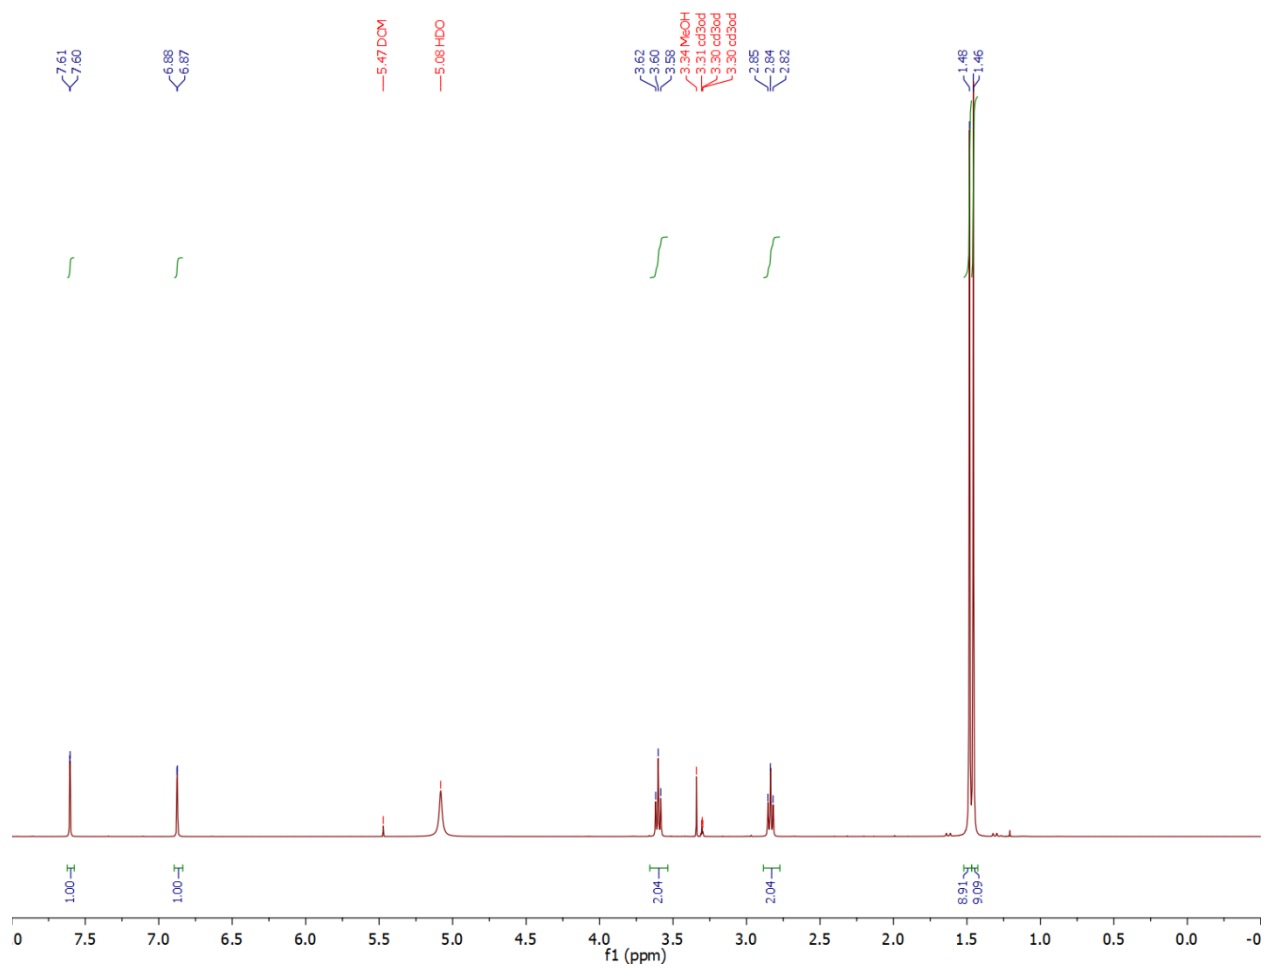

$^{13}\text{C}$  NMR for **3h-Boc**

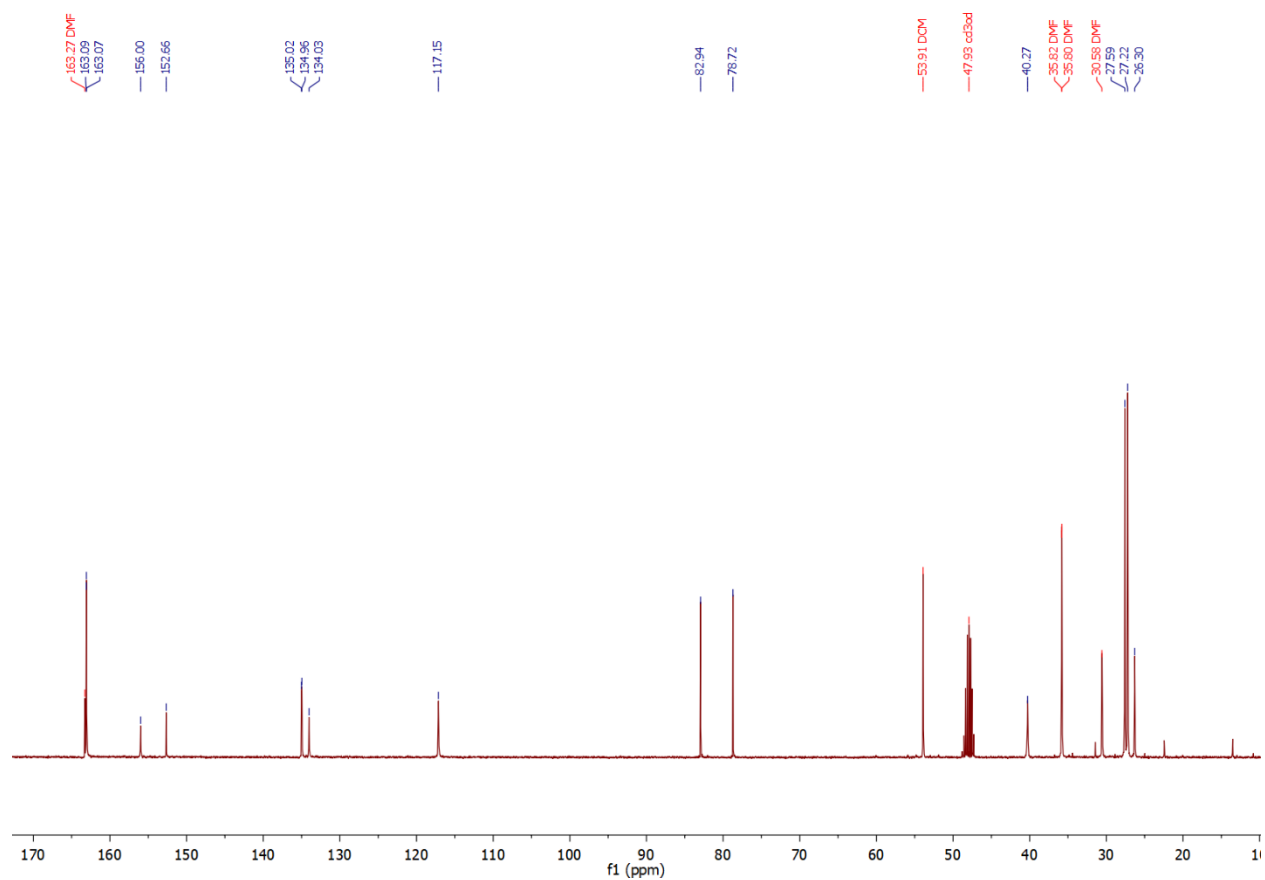

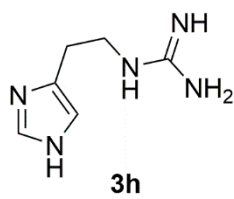

<sup>1</sup>H NMR for **3h**

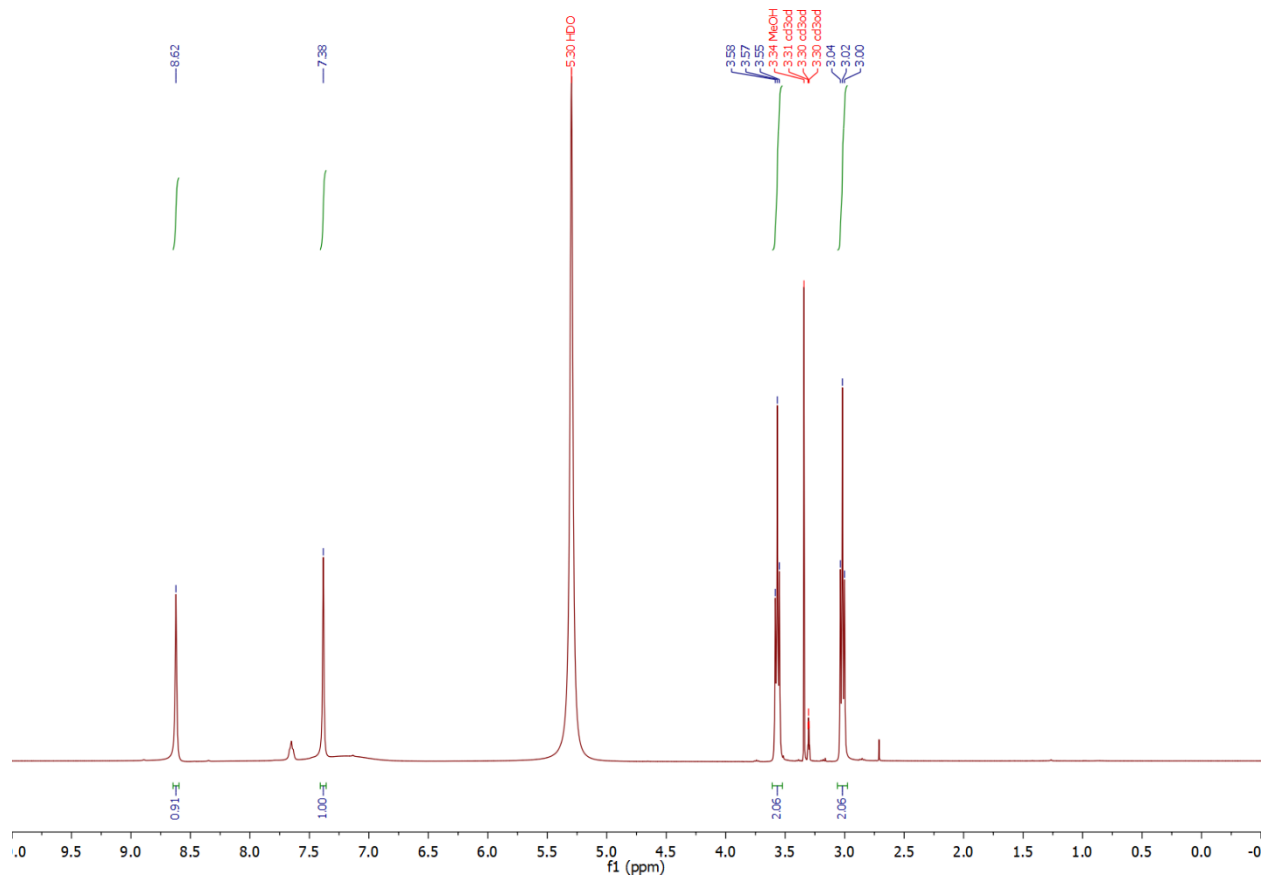

$^{13}\text{C}$  NMR for **3h**

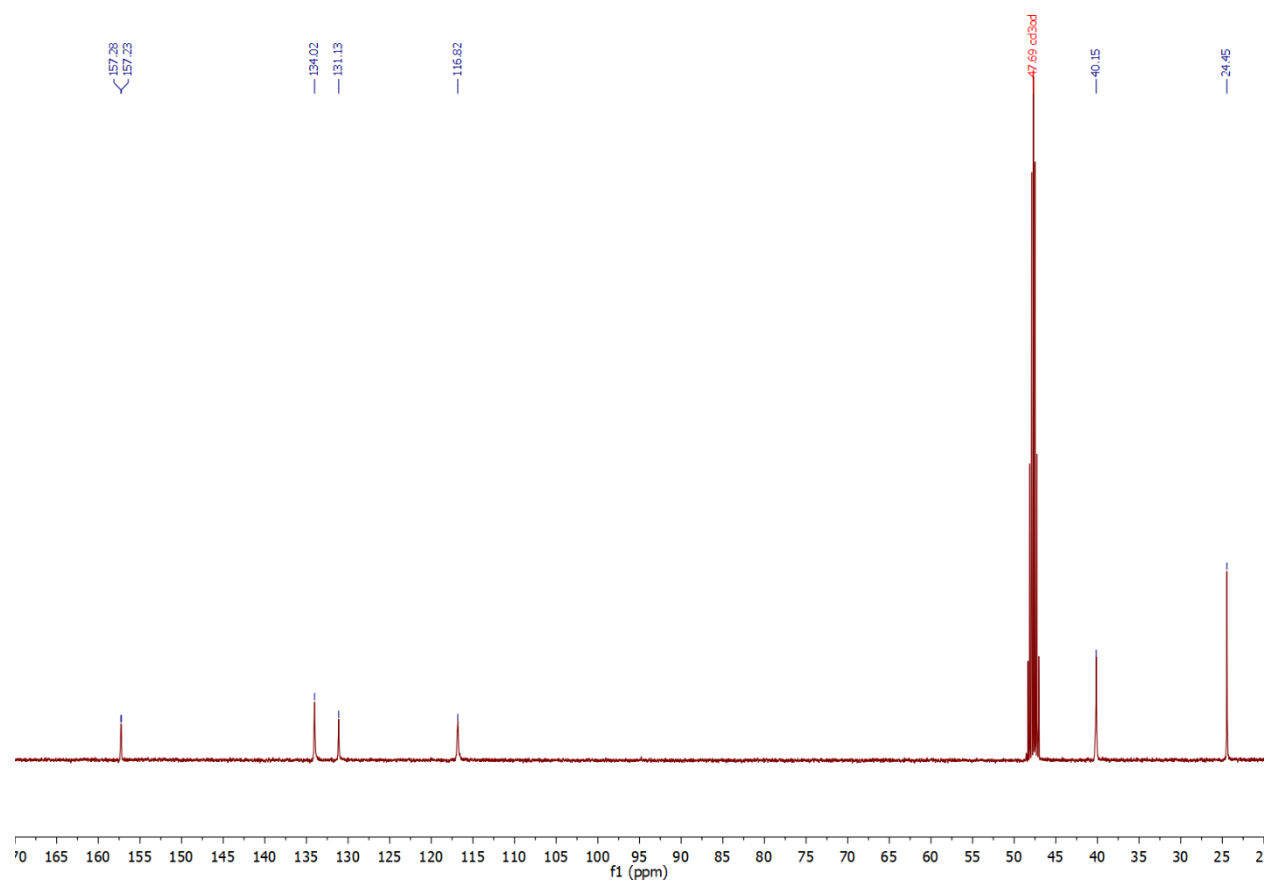

### 6.1.9 3F-PHPOG

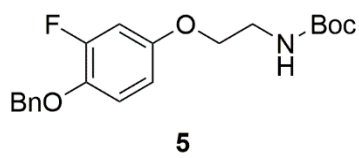

$^1\text{H}$  NMR for **5**

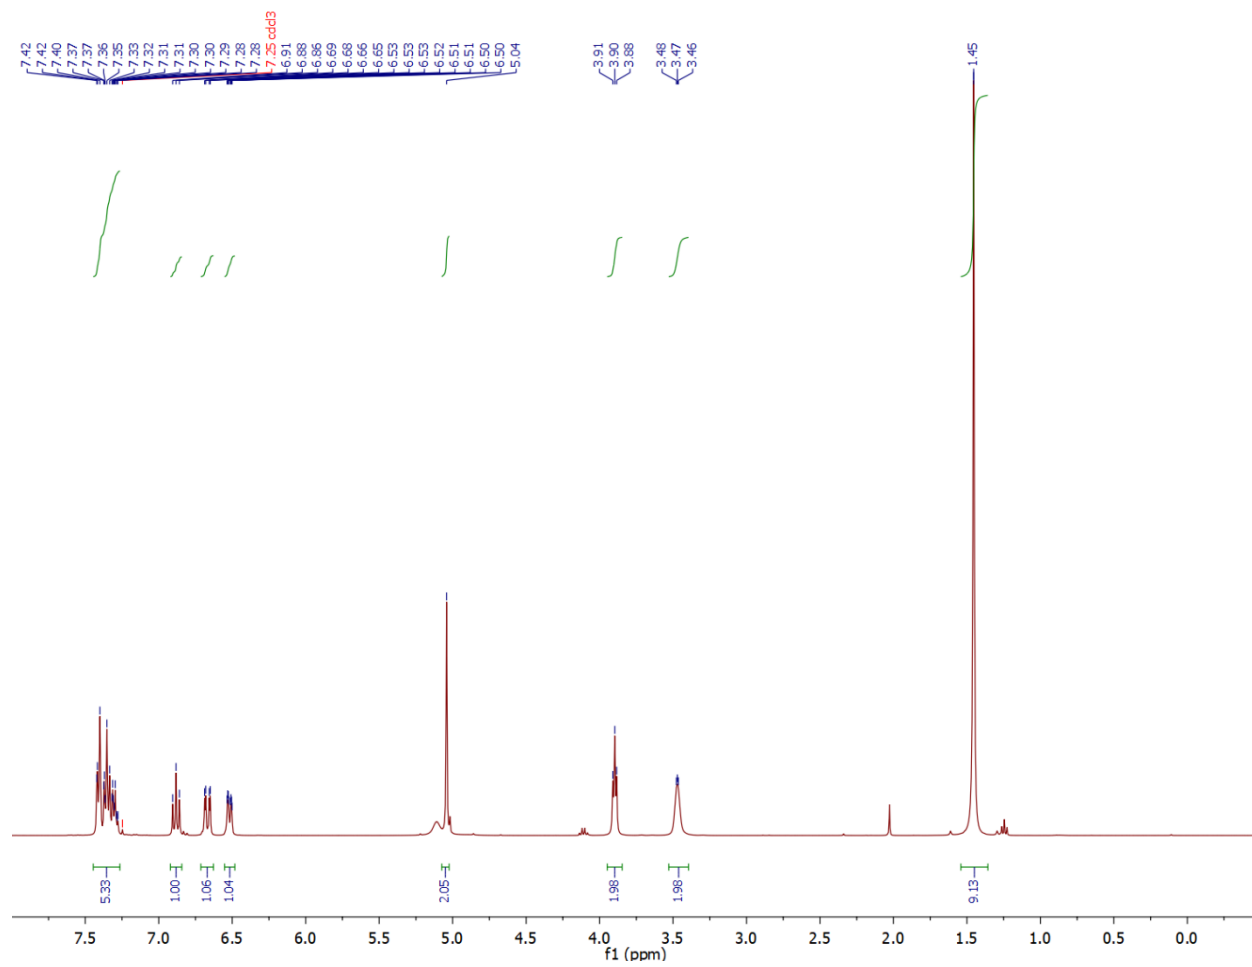



# $^{13}\text{C}$ NMR for **5**

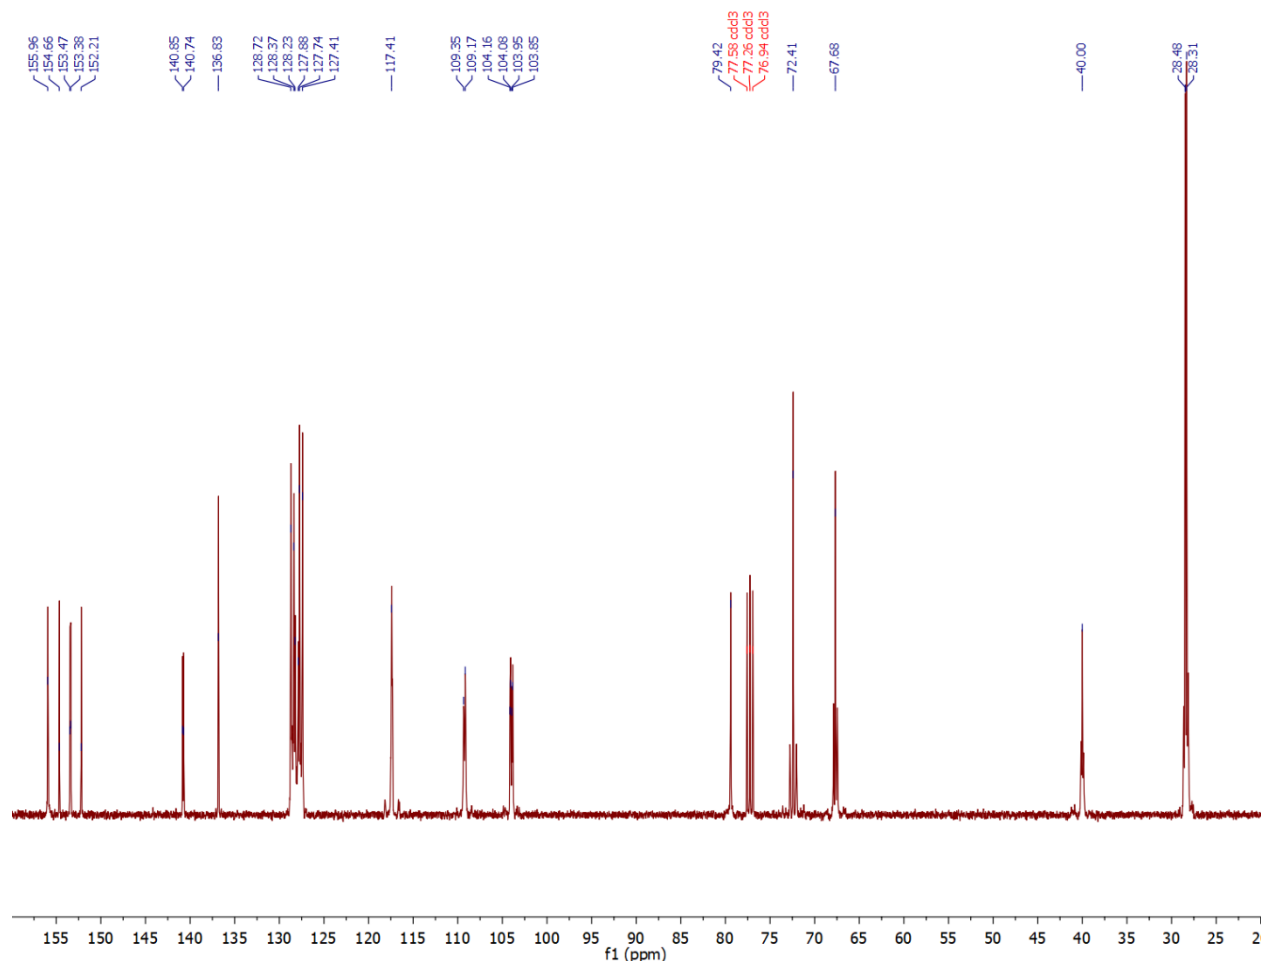

$^{19}\text{F}$  NMR for **5**

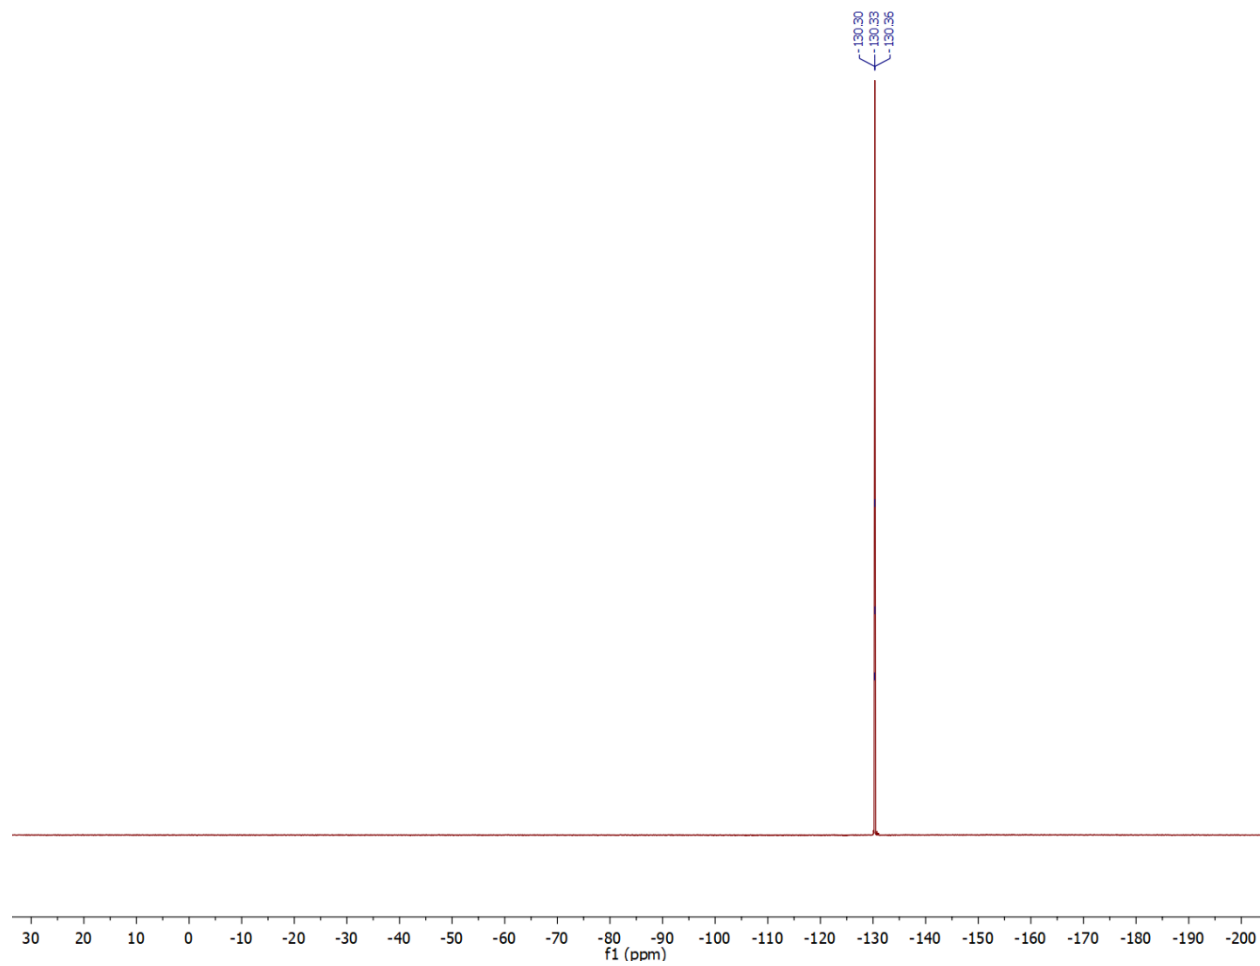

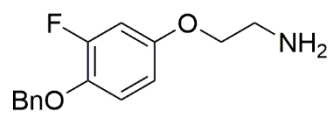

**6**

<sup>1</sup>H NMR for **6**

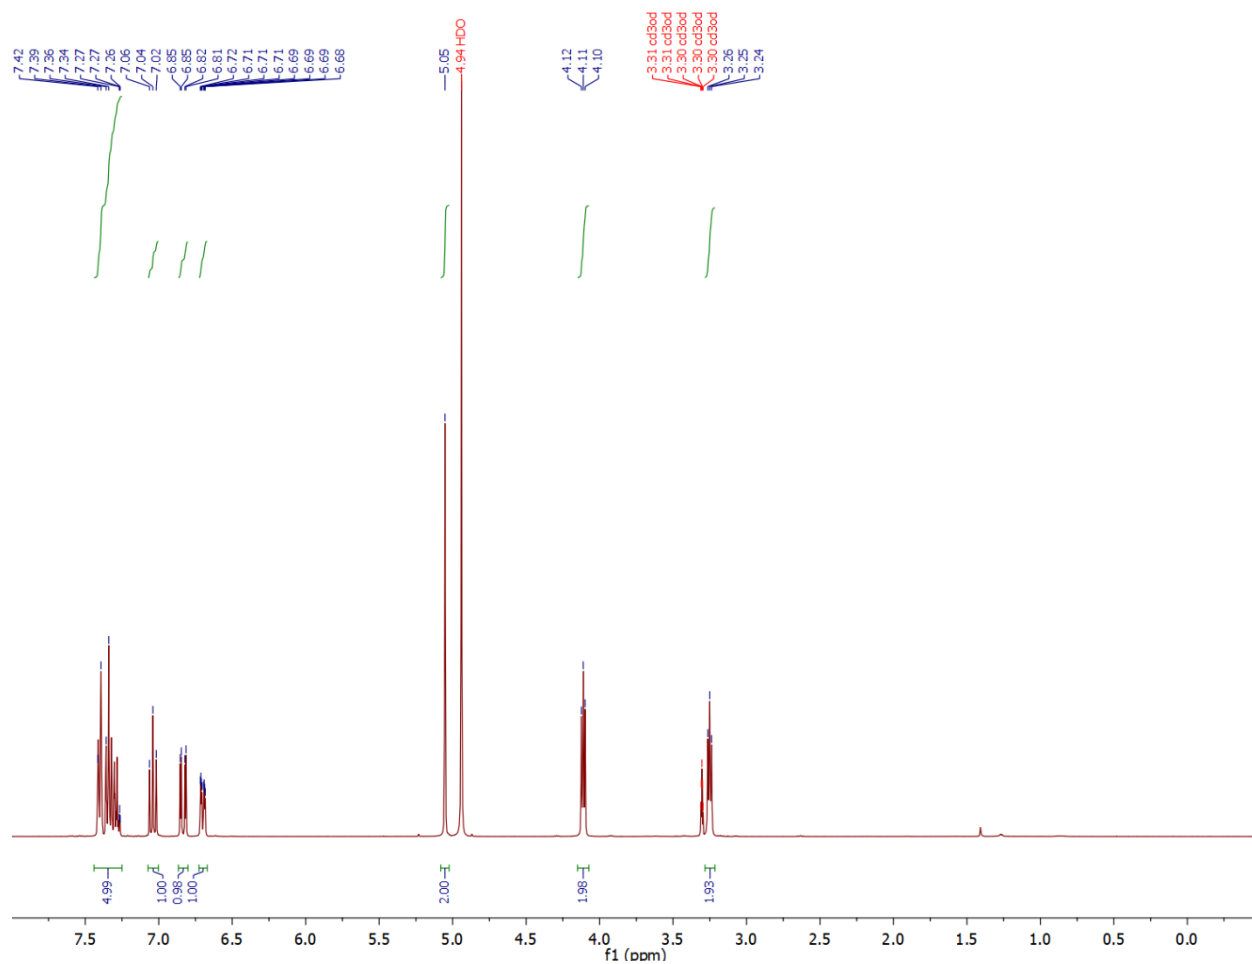

$^{13}\text{C}$  NMR for **6**

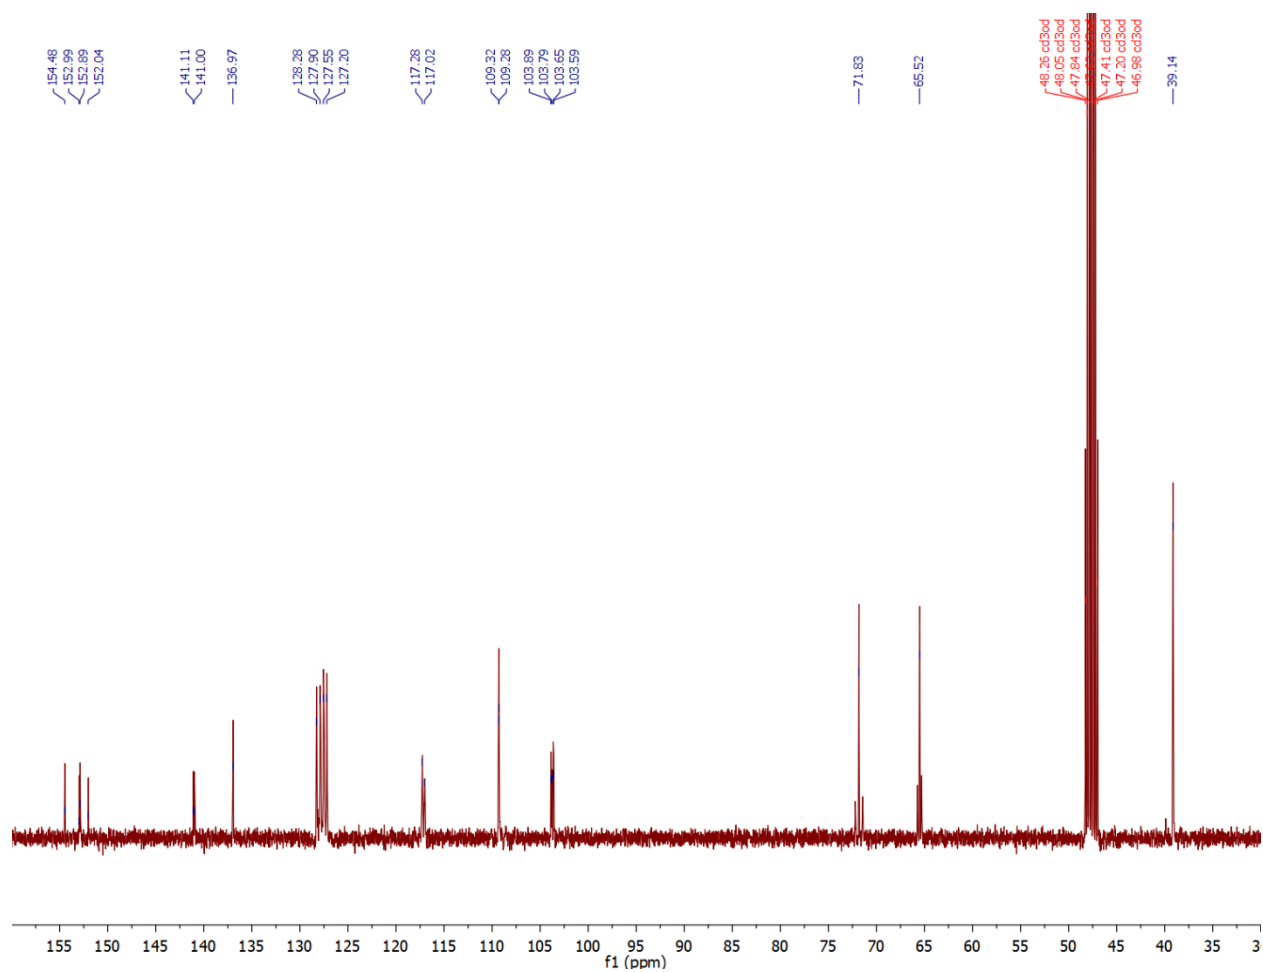

$^{19}\text{F}$  NMR for **6**

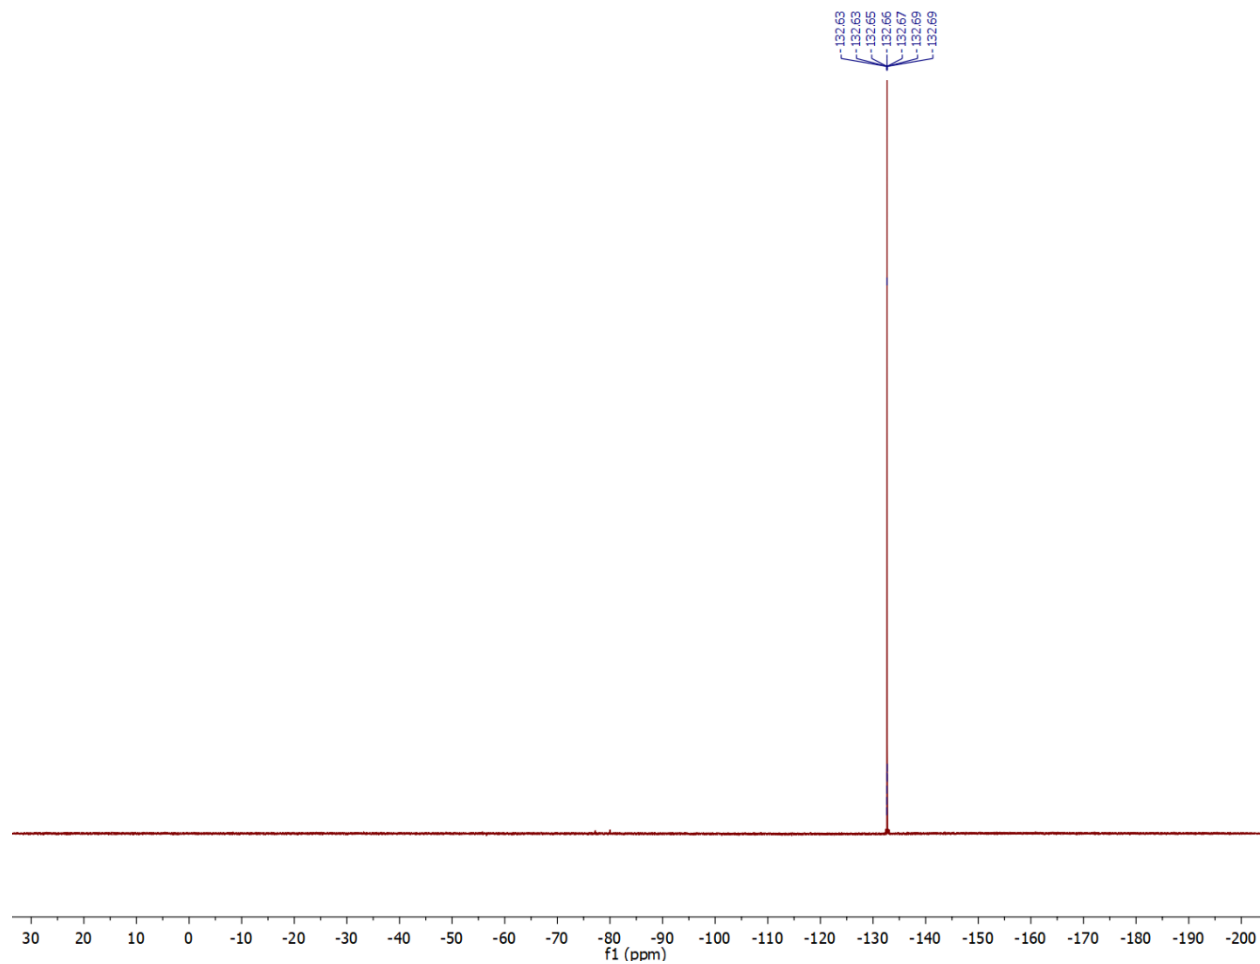

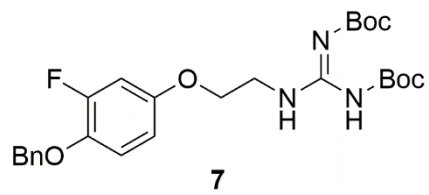

<sup>1</sup>H NMR for **7**

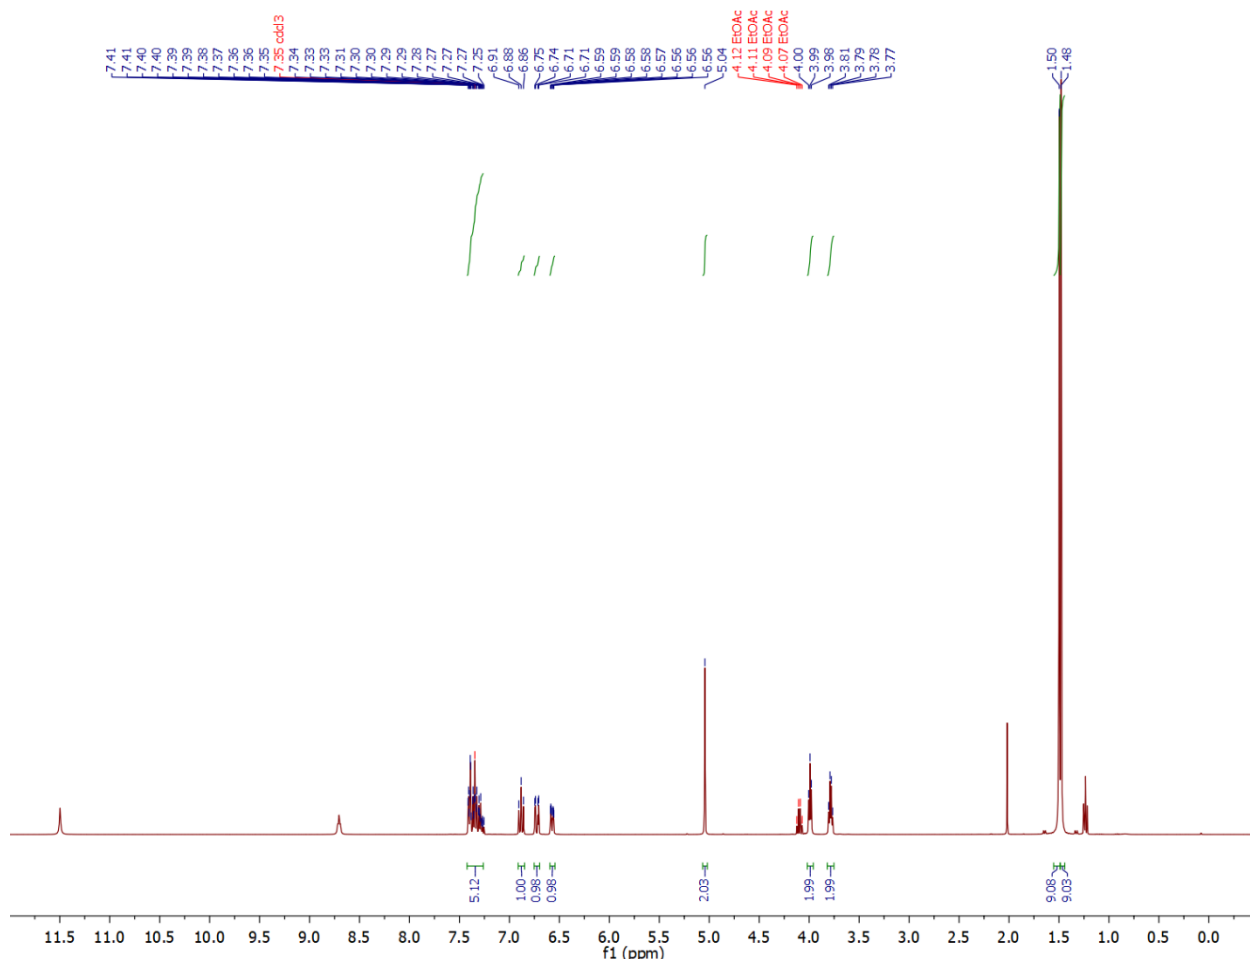

$^{13}\text{C}$  NMR for **7**

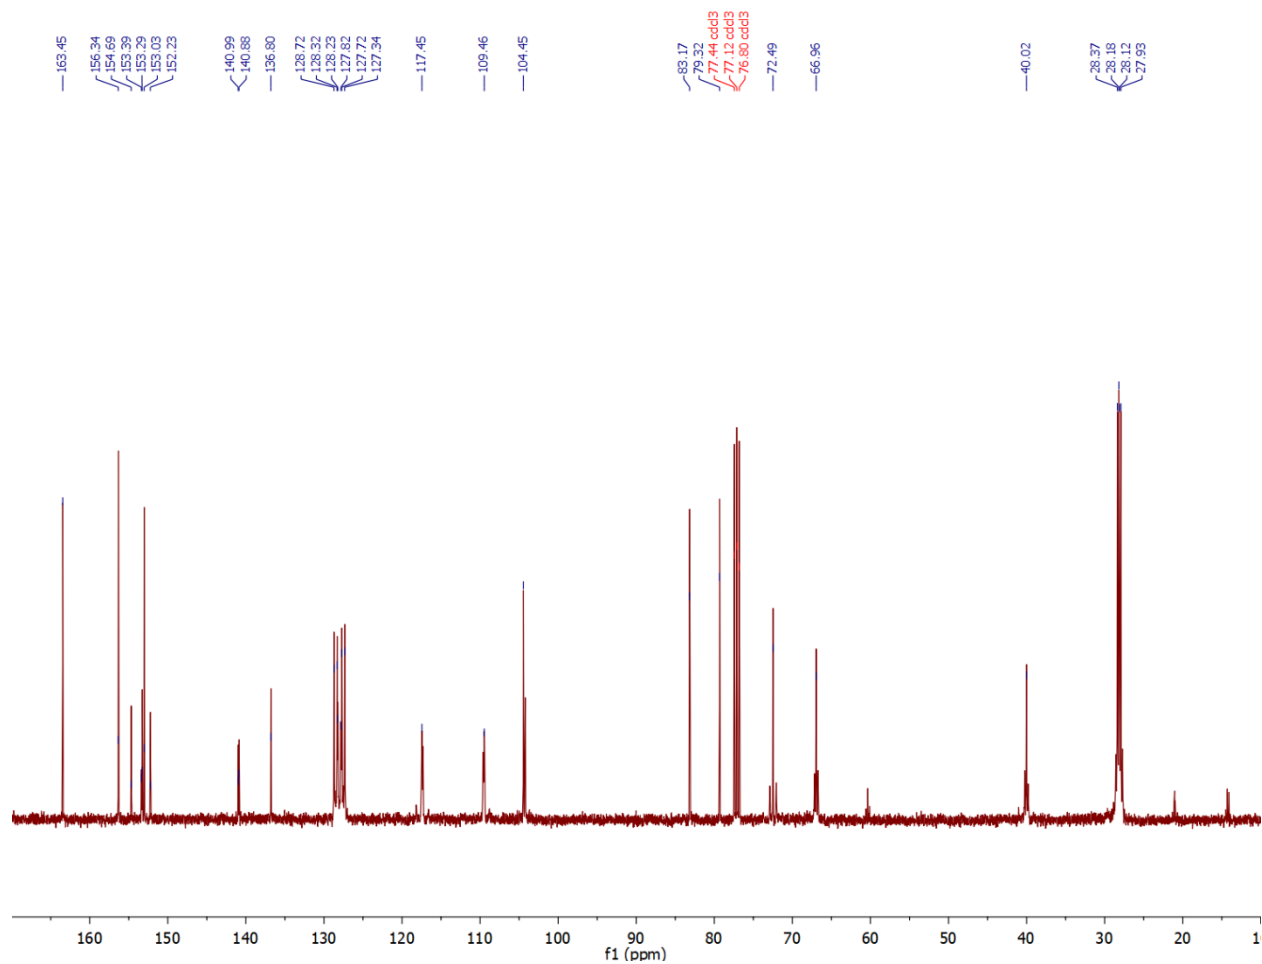

$^{19}\text{F}$  NMR for **7**

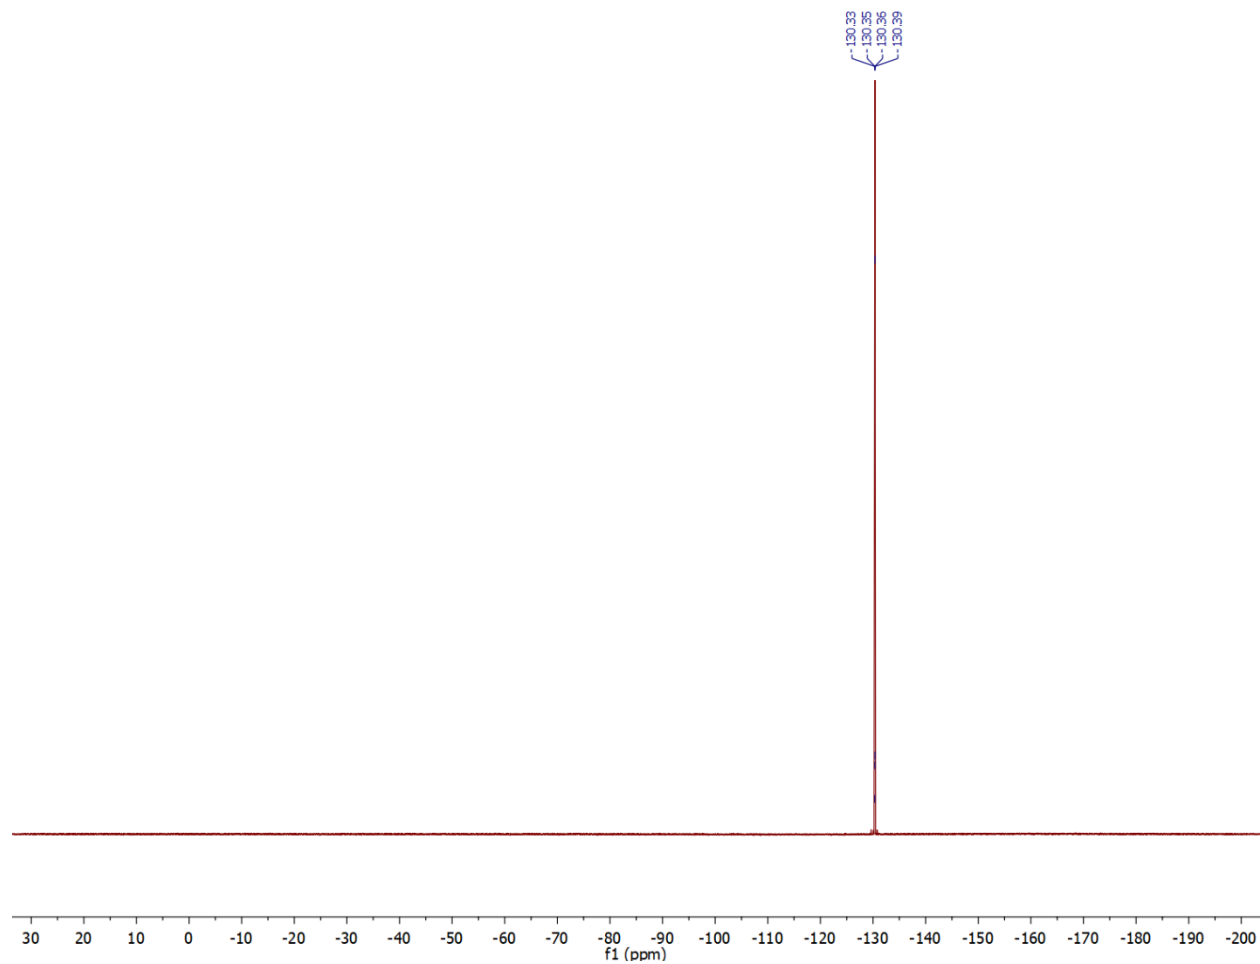



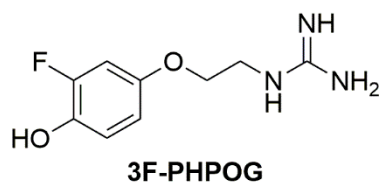

<sup>1</sup>H NMR for **3F-PHPOG (3i)**

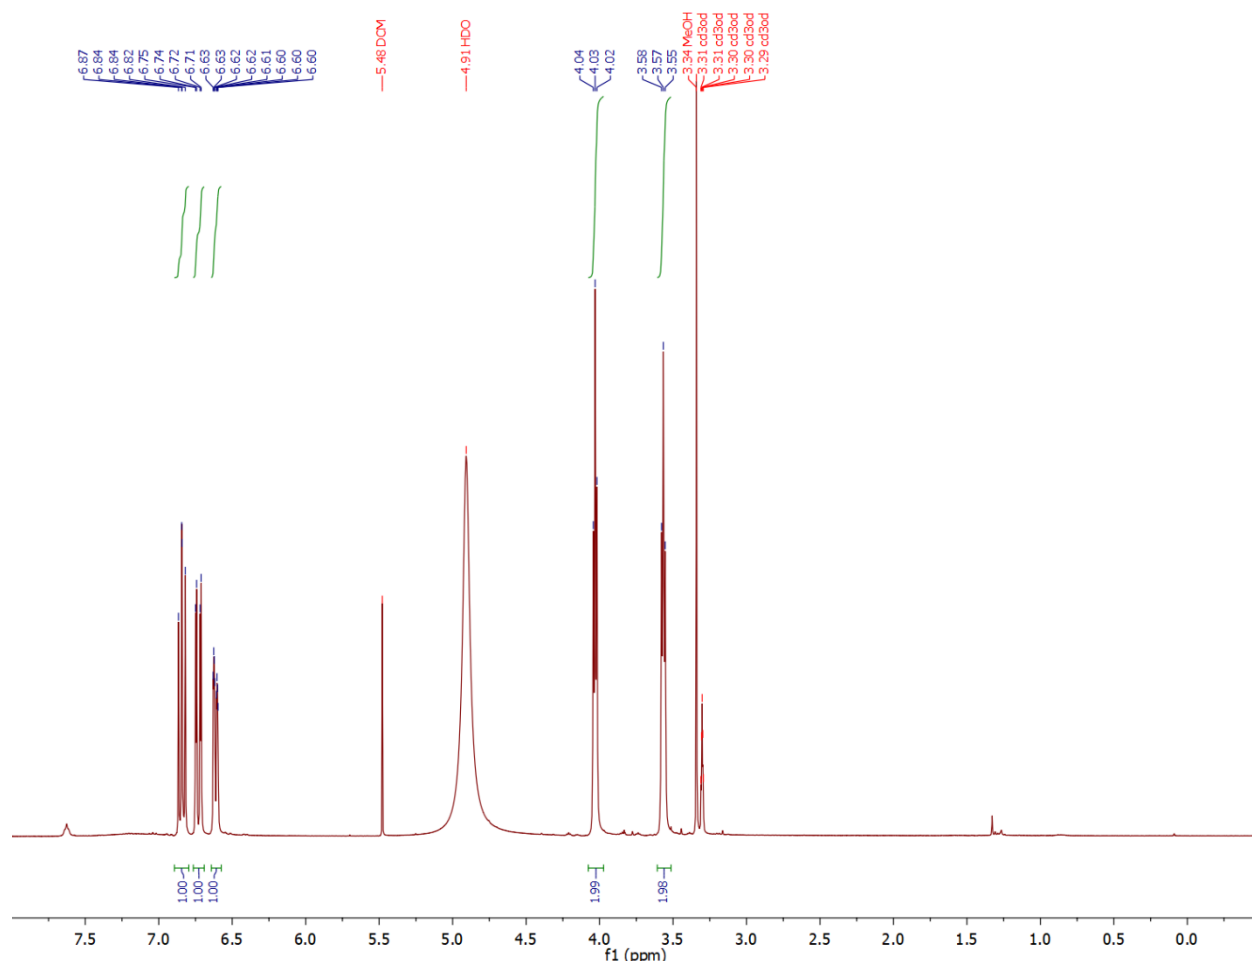

$^{13}\text{C}$  NMR for **3F-PHPOG (3i)**

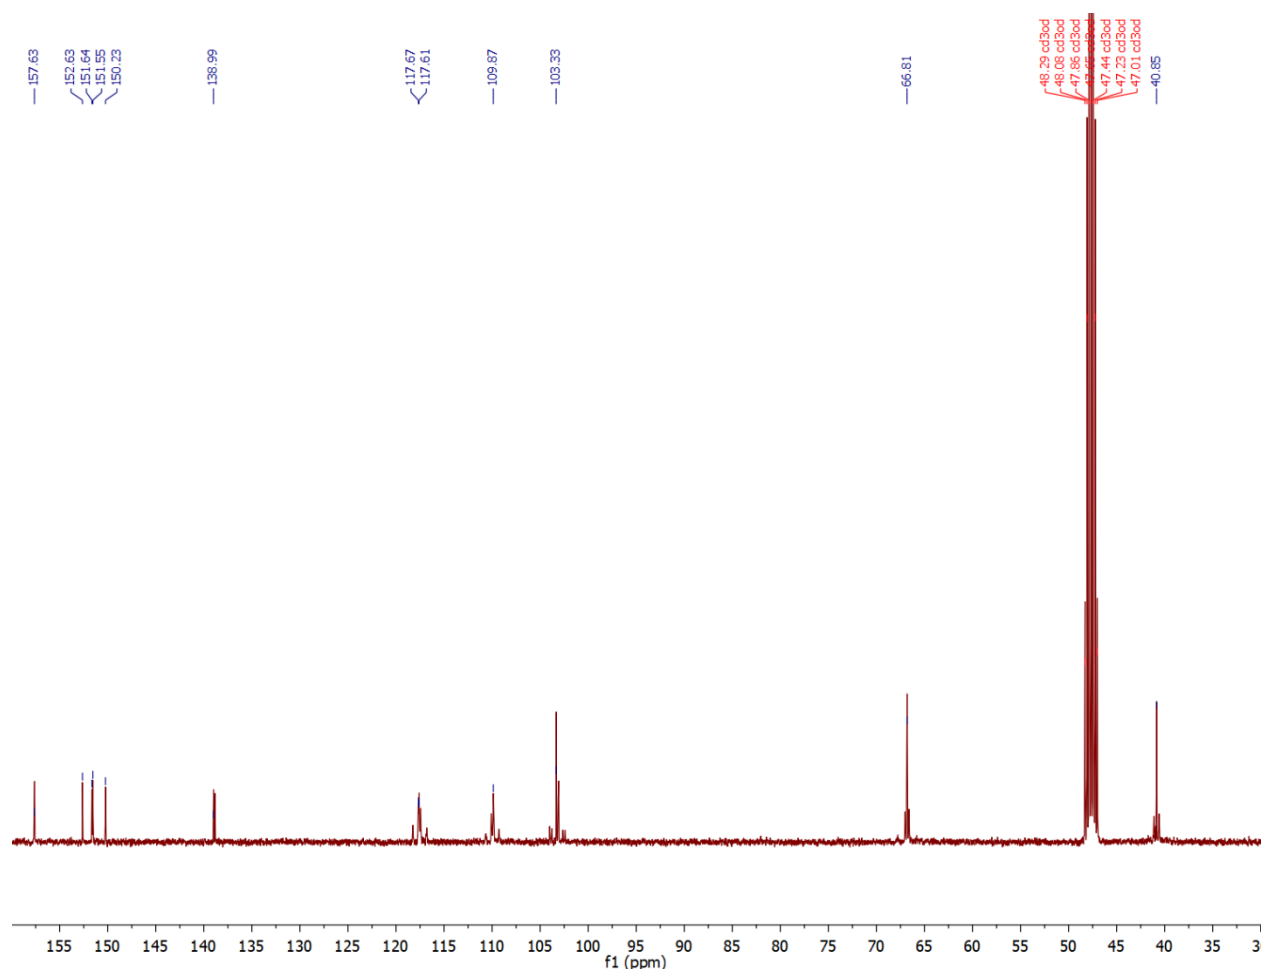

$^{19}\text{F}$  NMR for **3F-PHPOG (3i)**

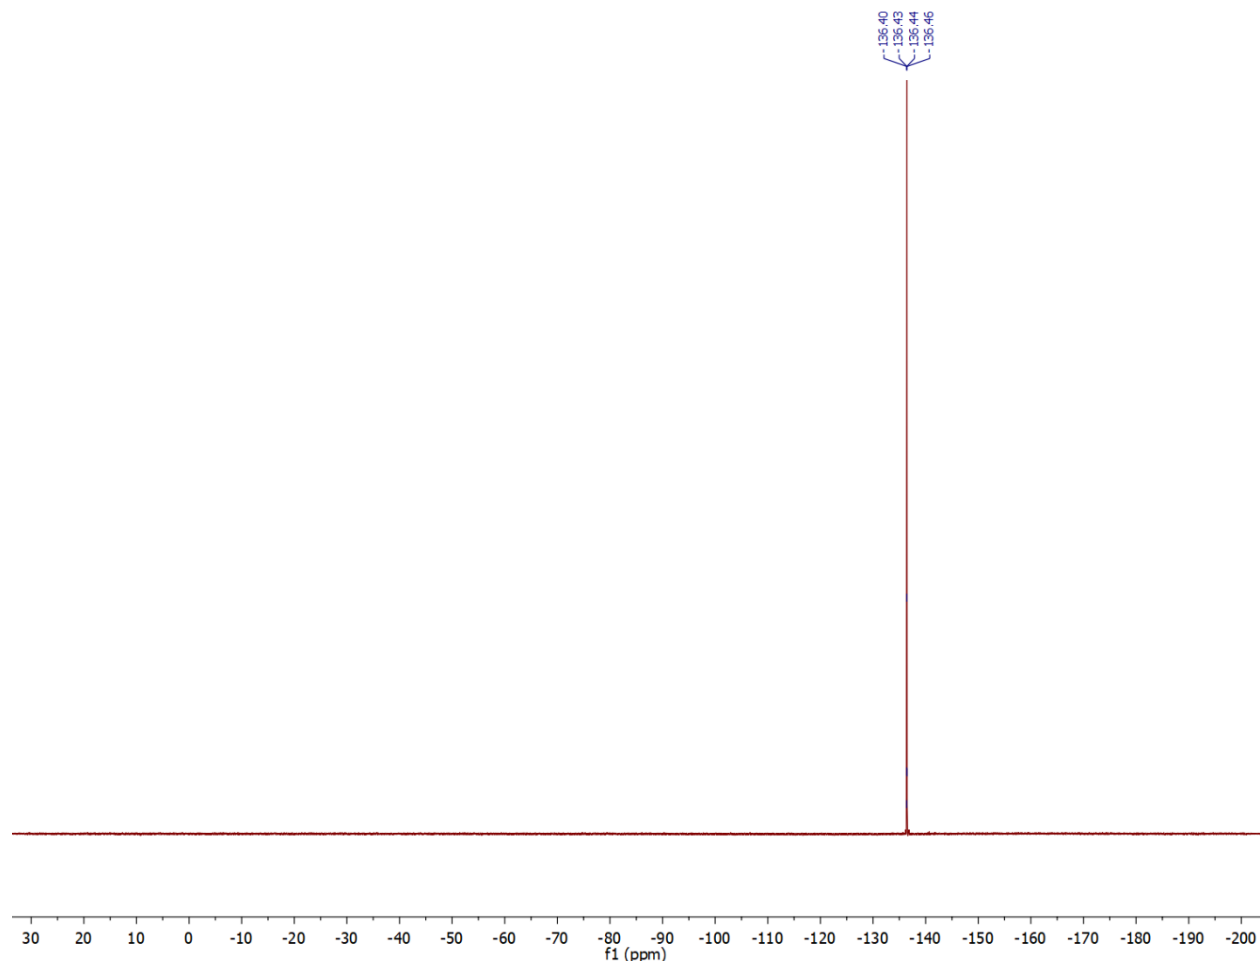

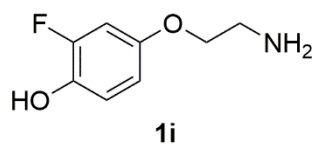

$^1\text{H}$  NMR for **1i**

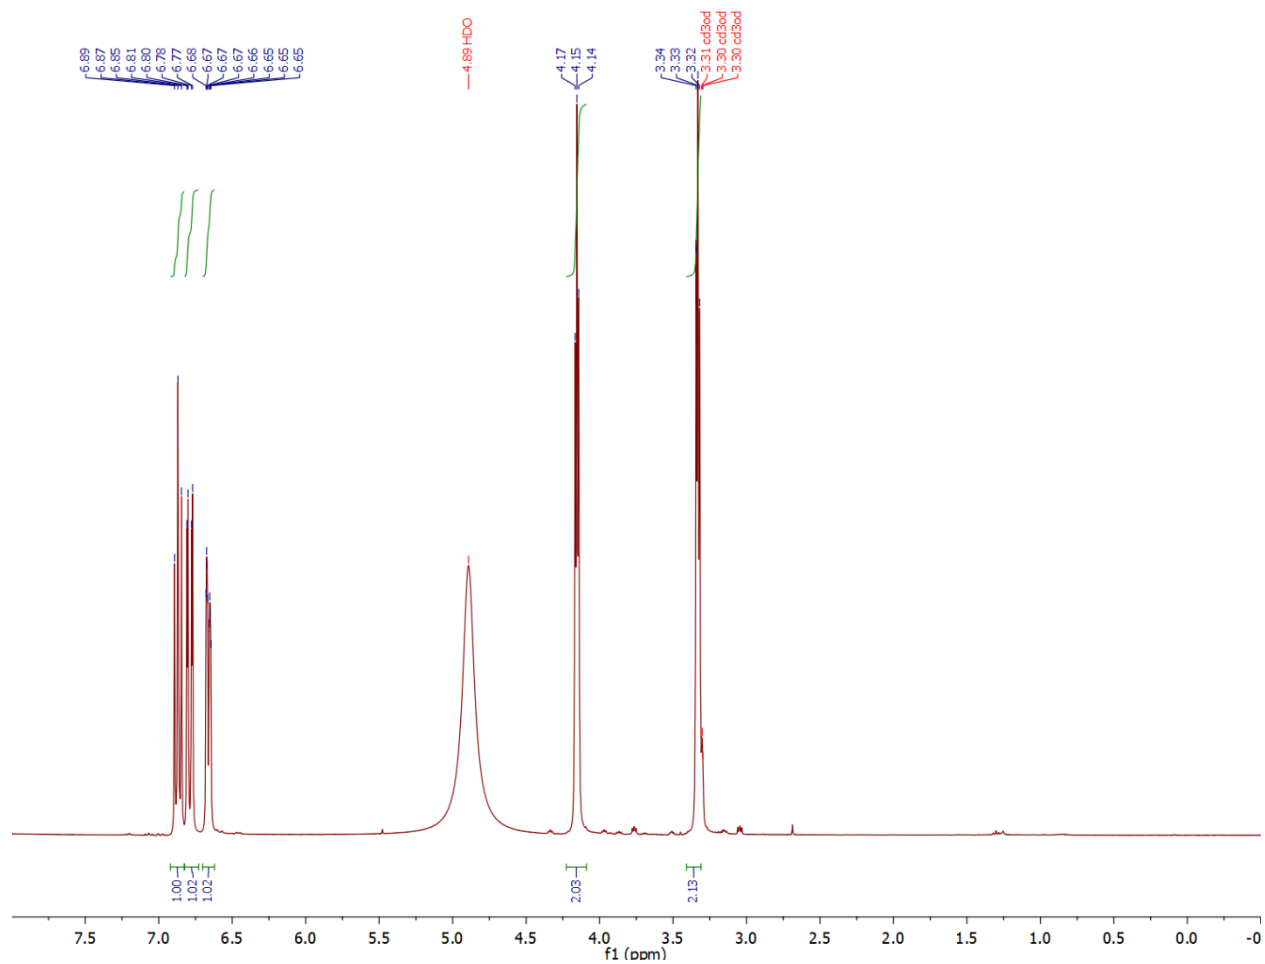

$^{13}\text{C}$  NMR for **1i**

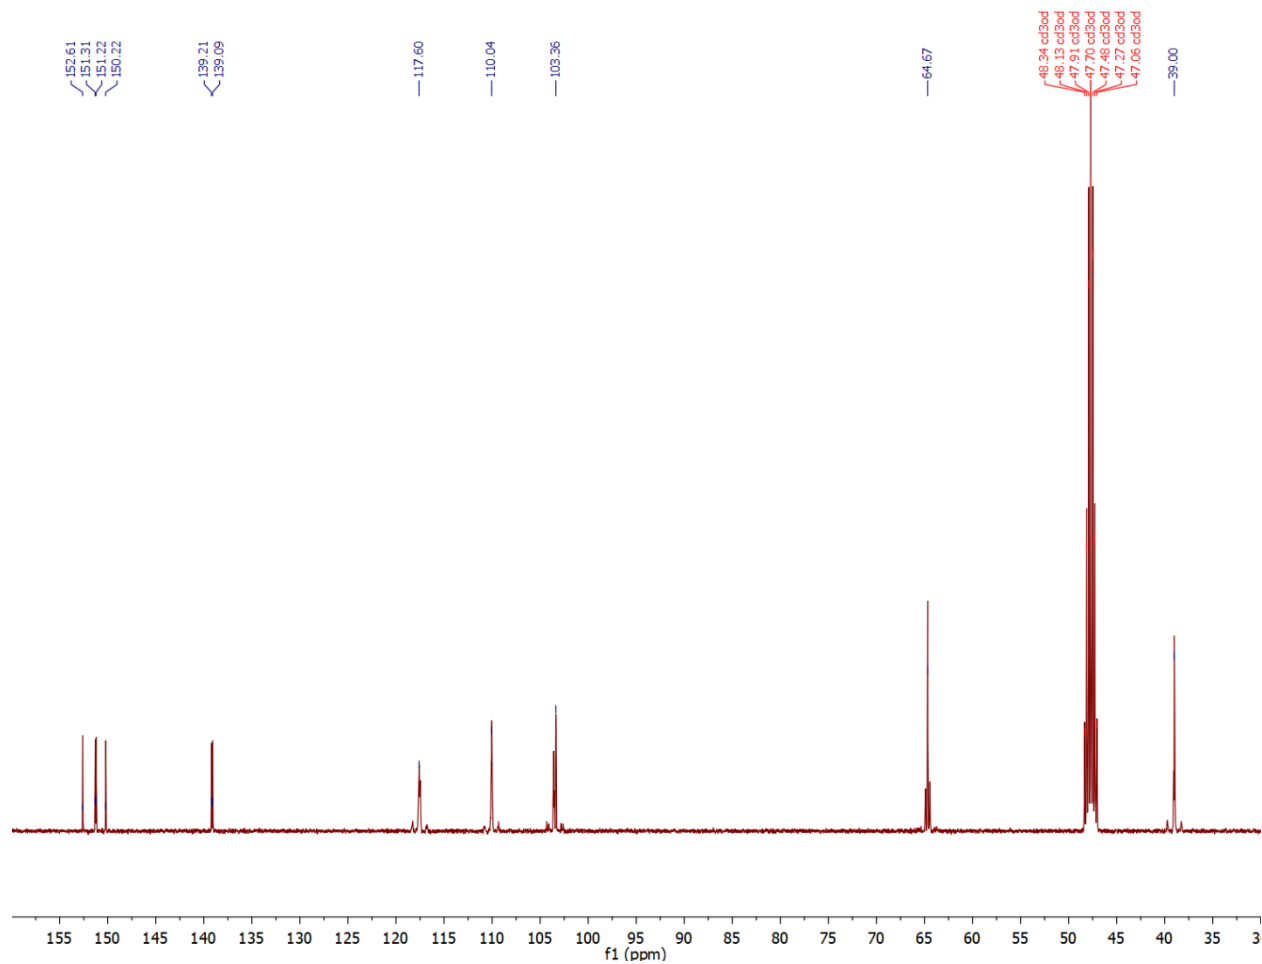

$^{19}\text{F}$  NMR for **1i**

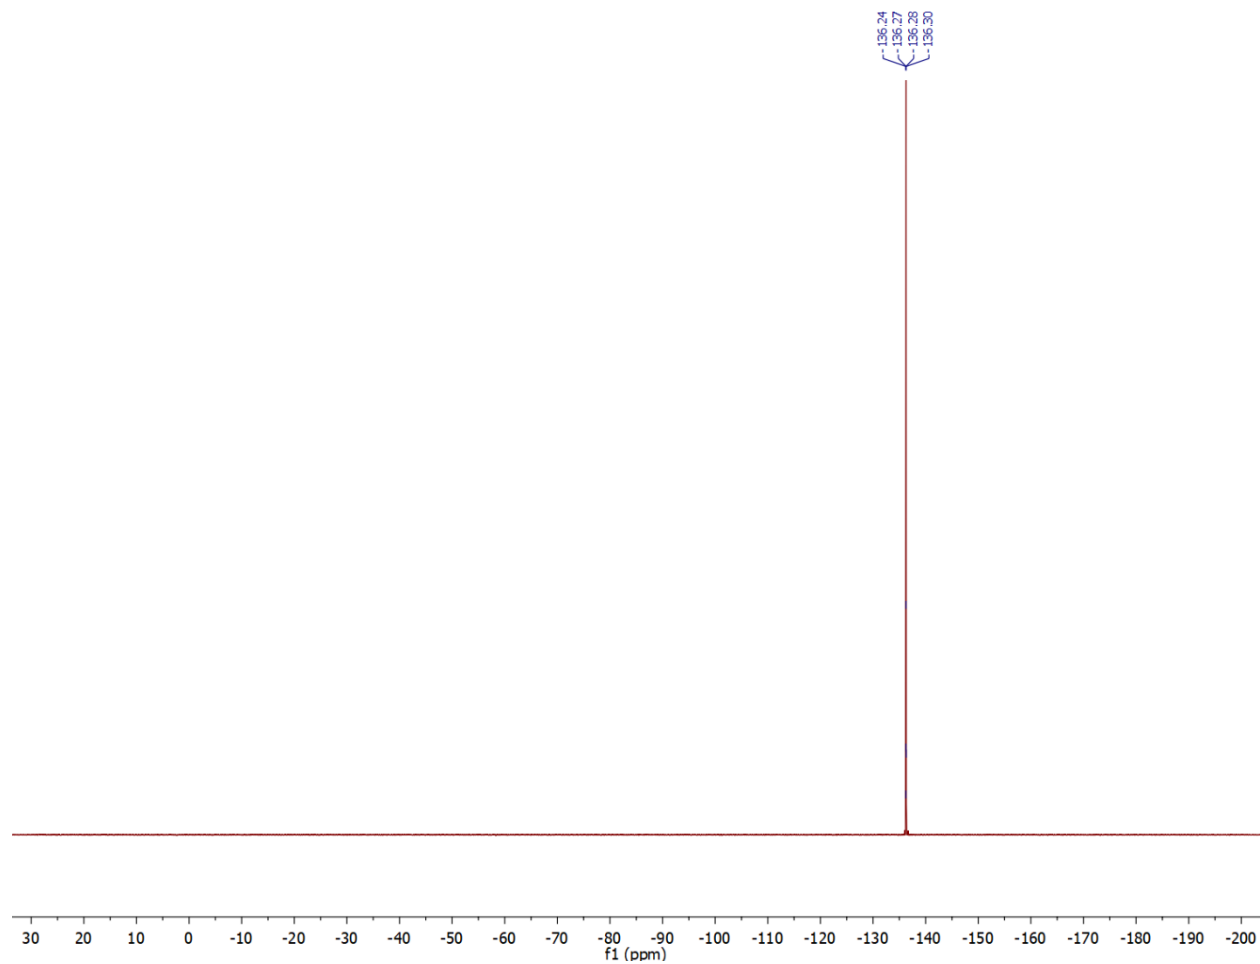

## 6.2 High Resolution Mass Spectra

### 6.2.1 MFBG

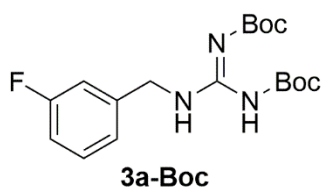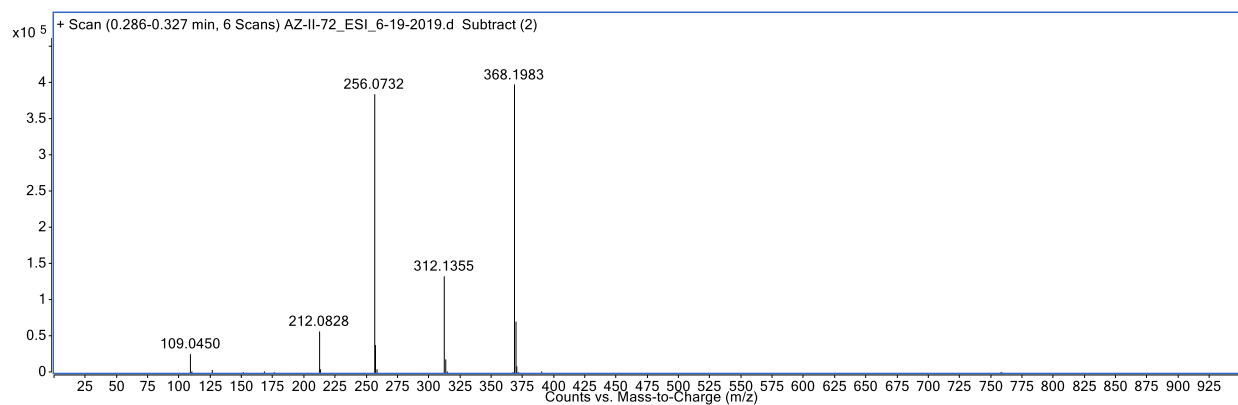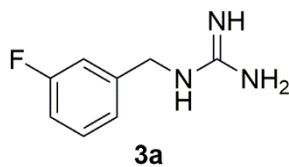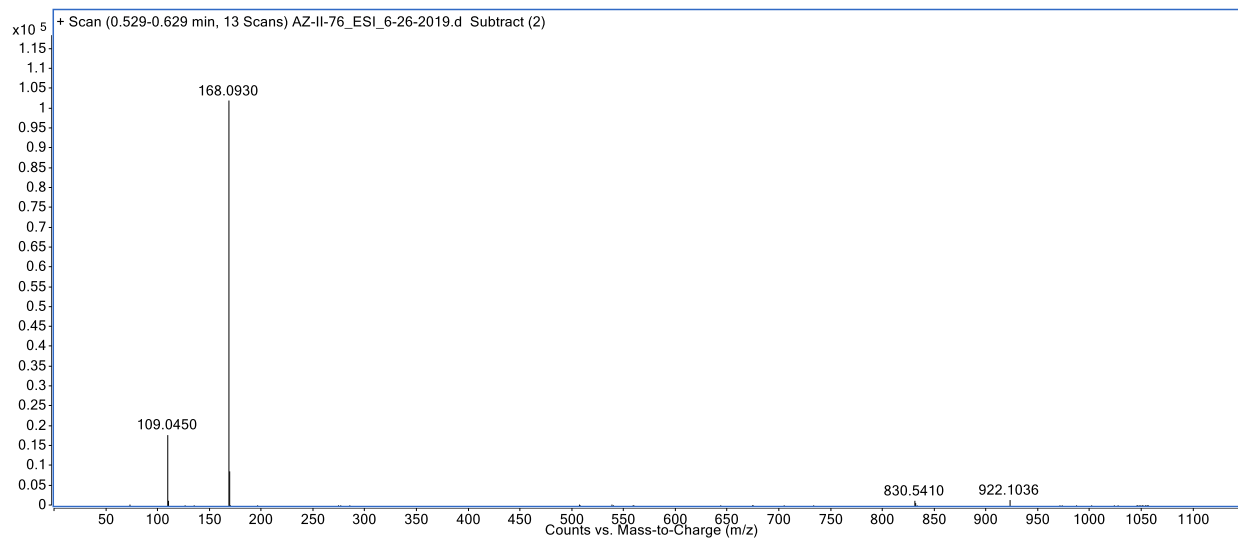

## 6.2.2 MFPG

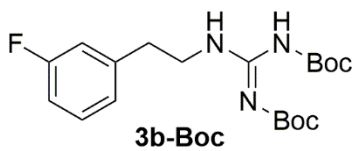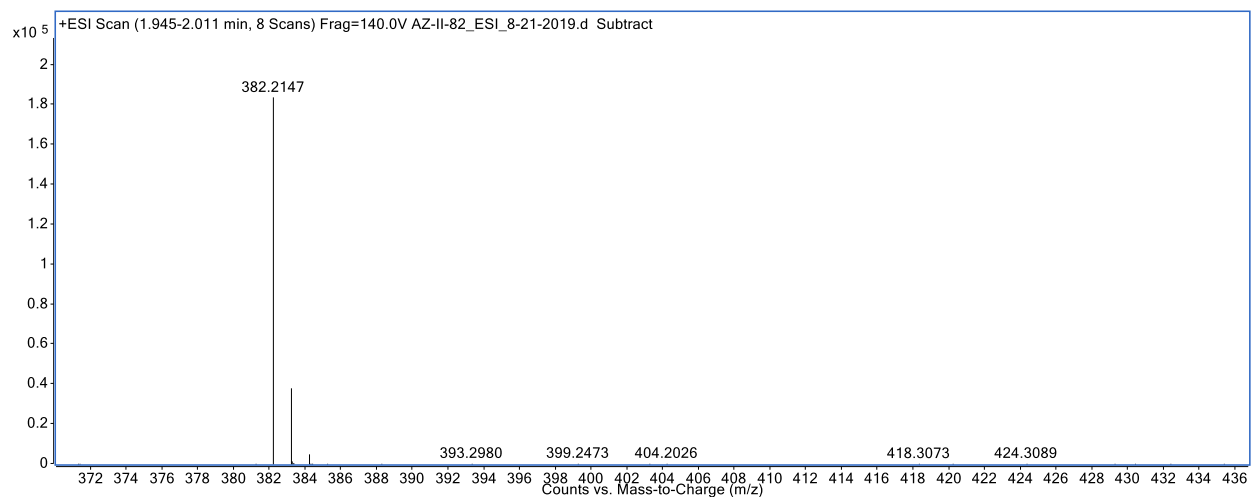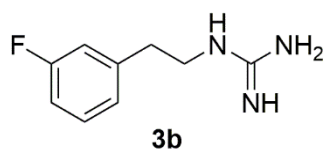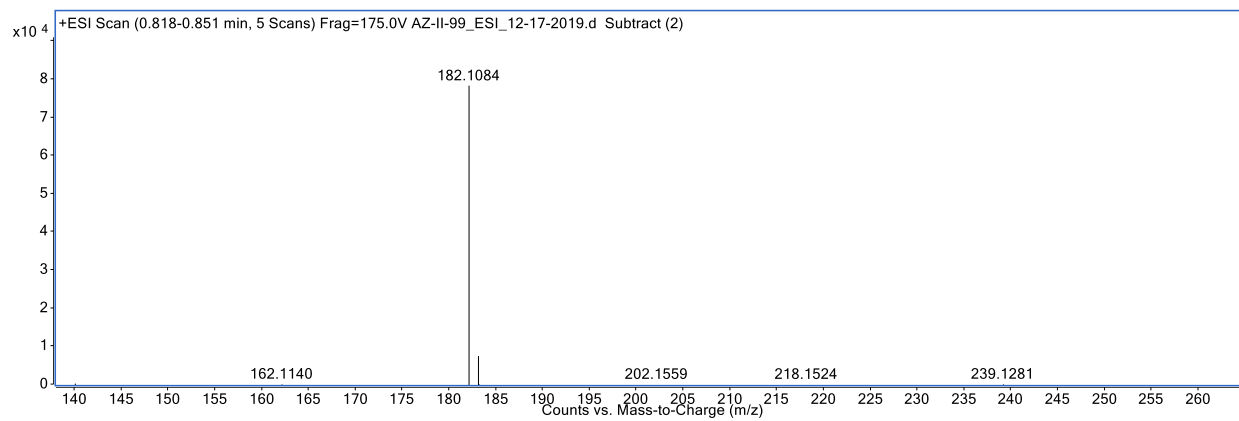



### 6.2.3 5F-MHPG

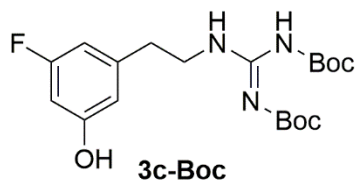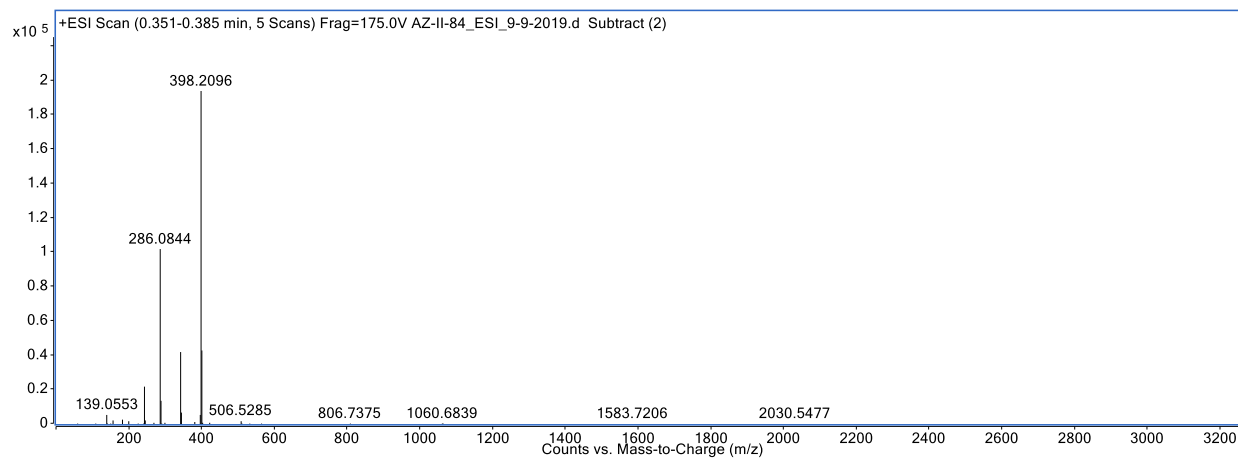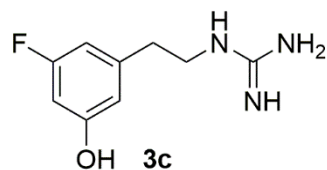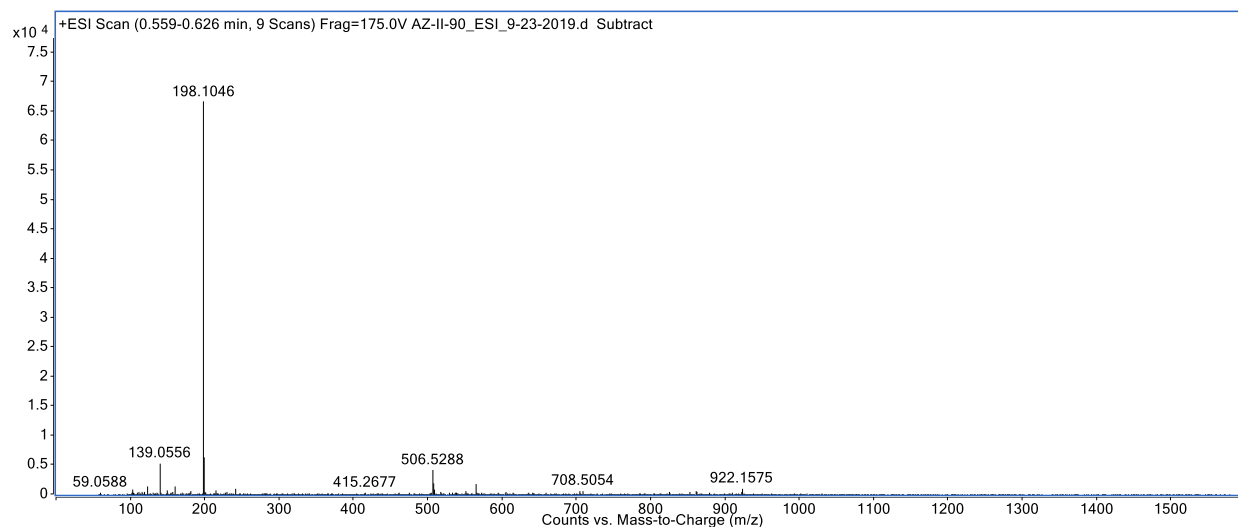

## 6.2.4 DOPG

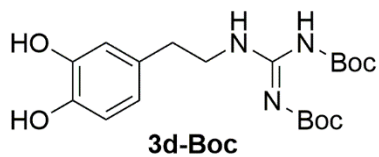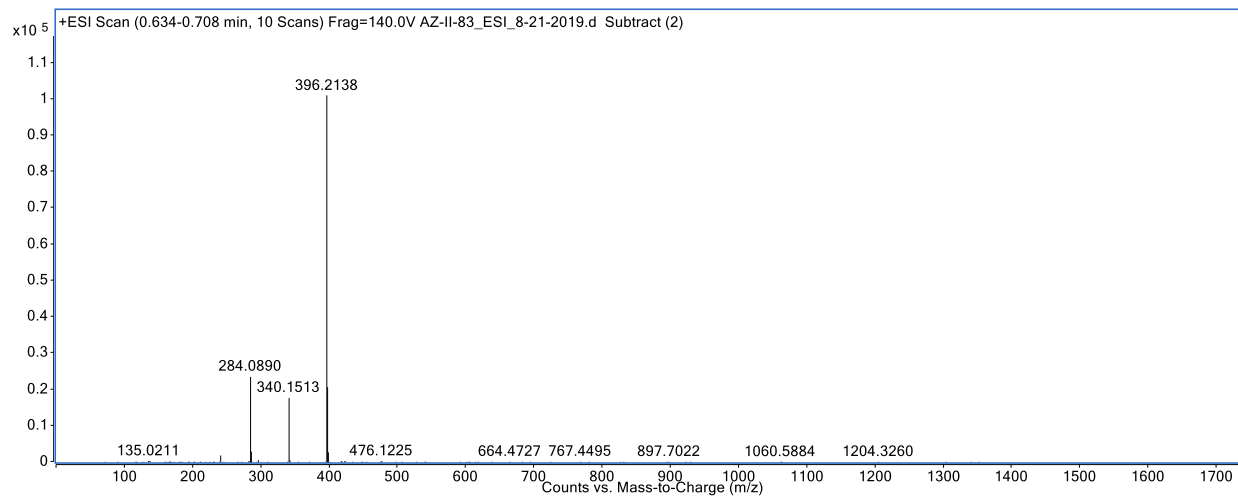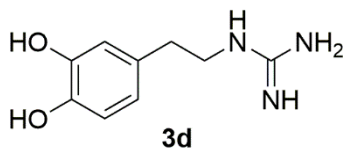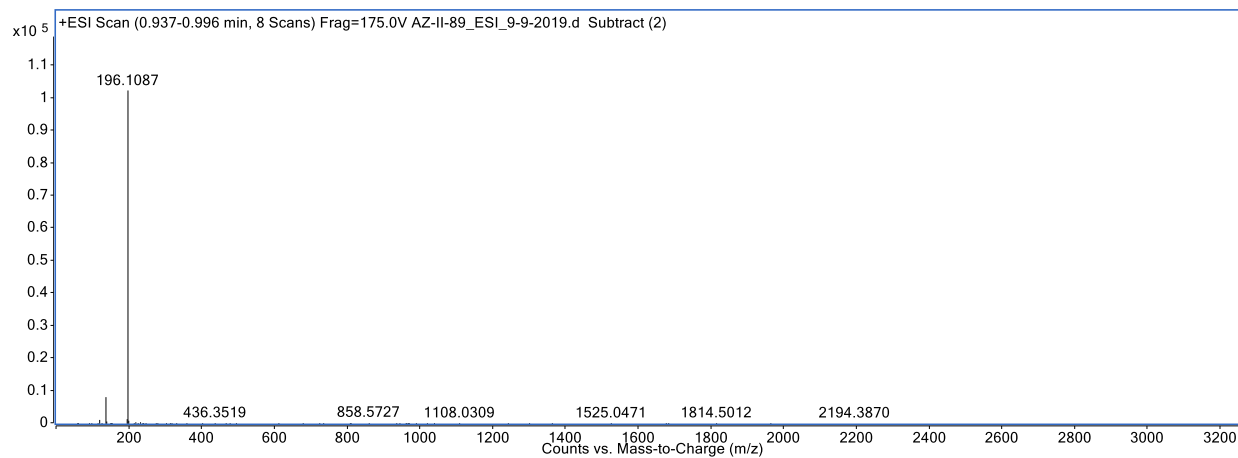

## 6.2.5 GMO

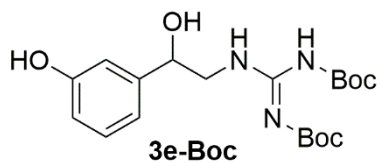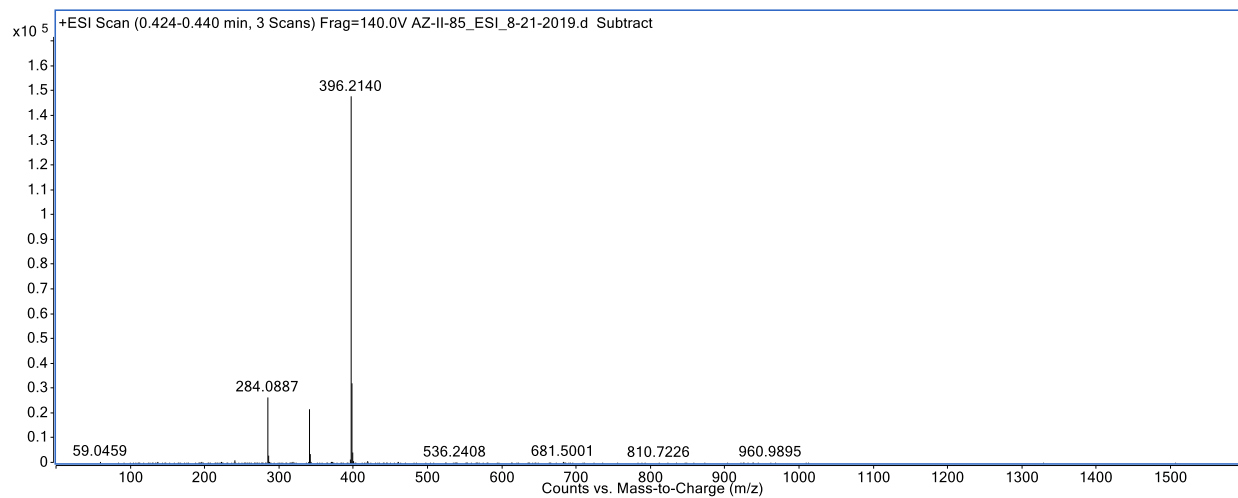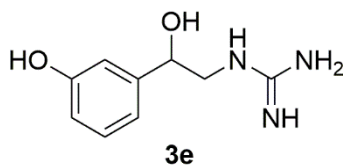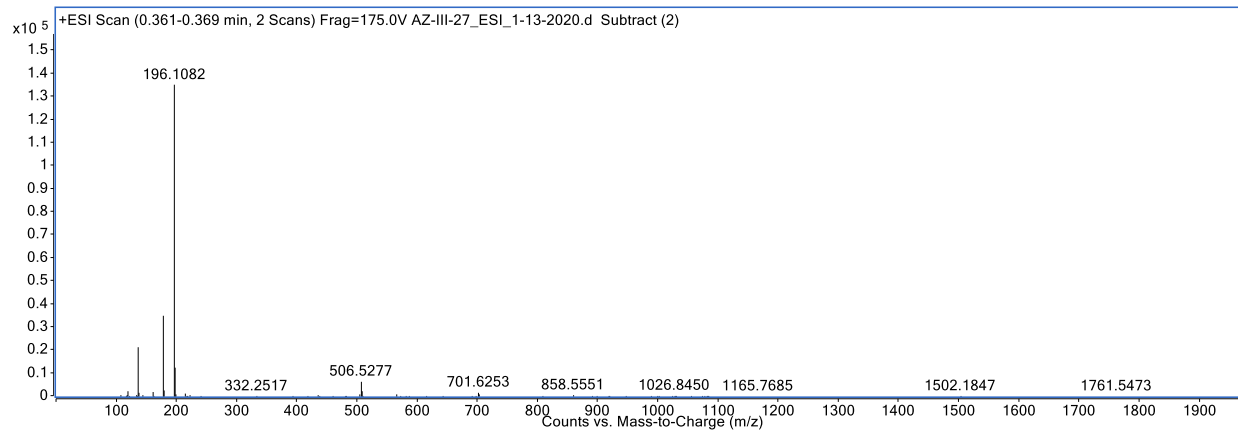

## 6.2.6 MIBG

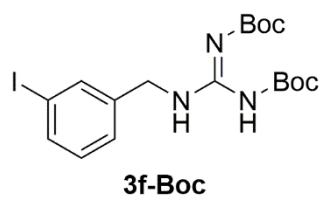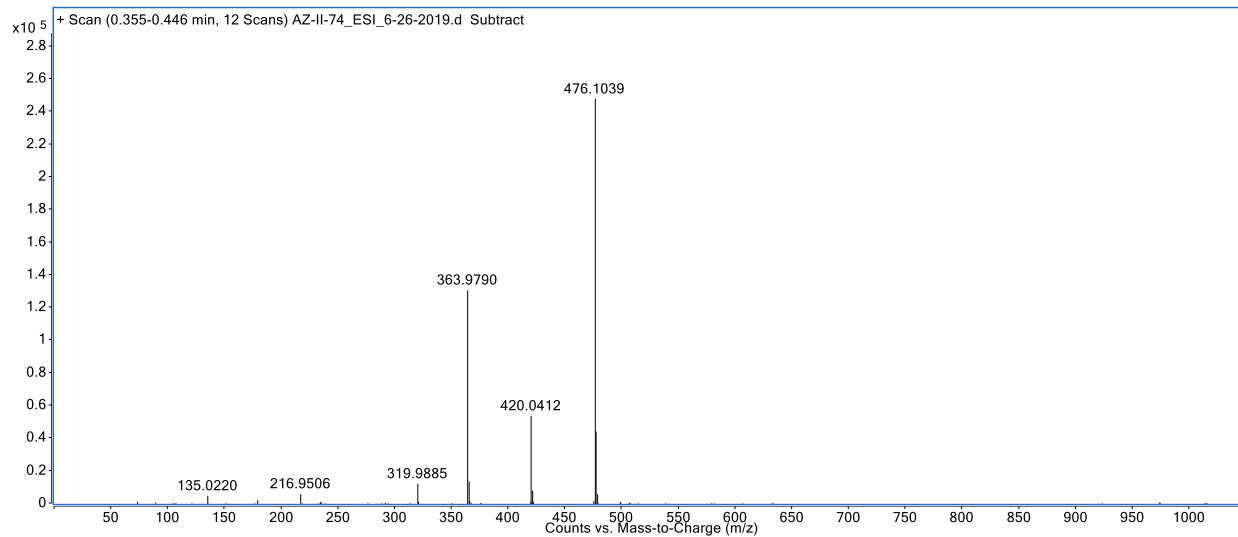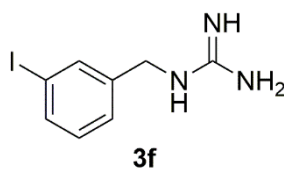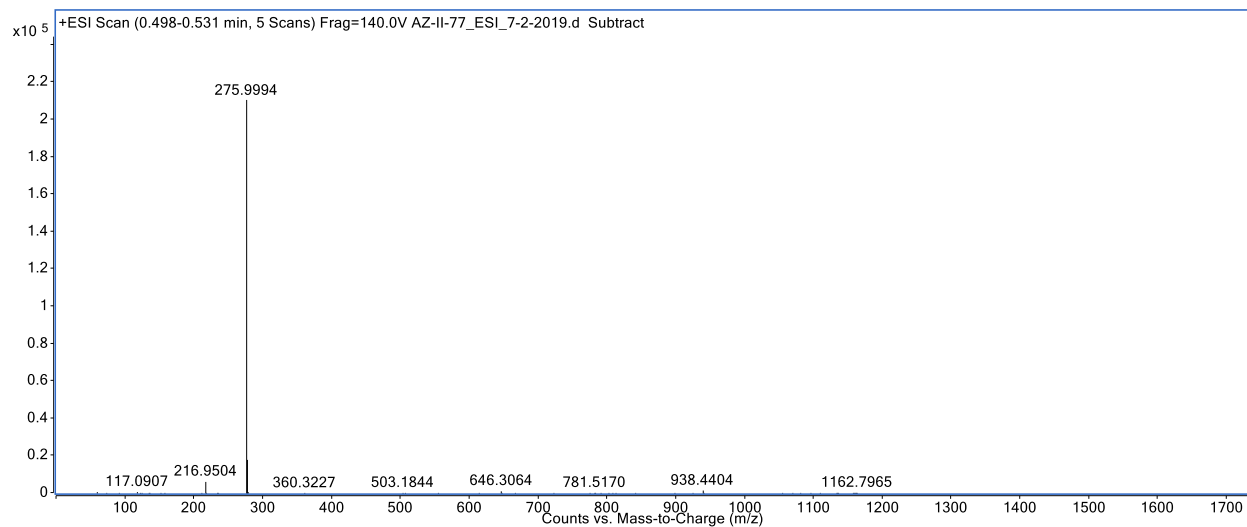

## 6.2.7 HTG

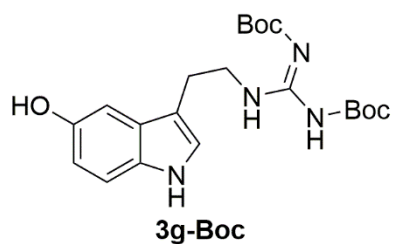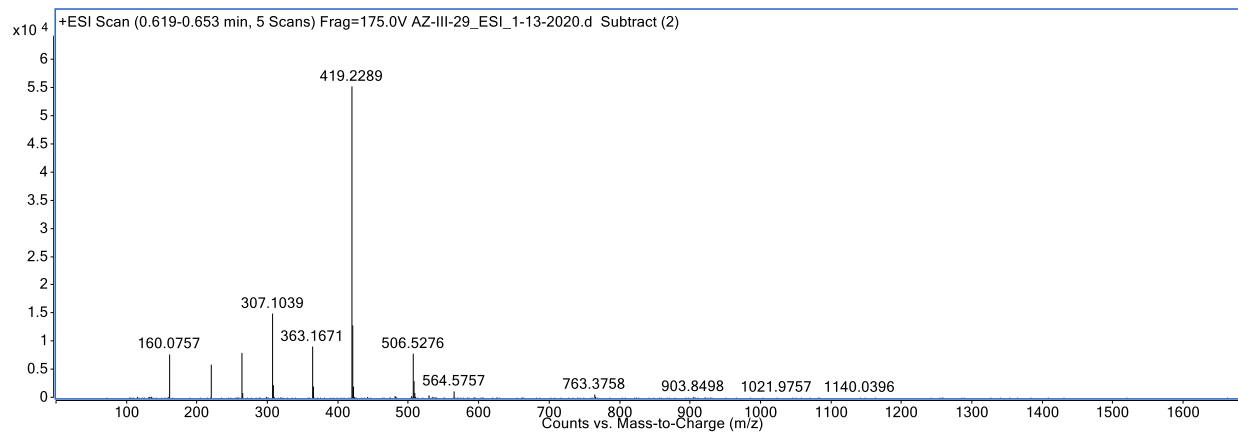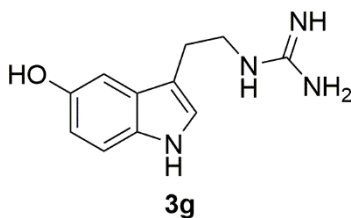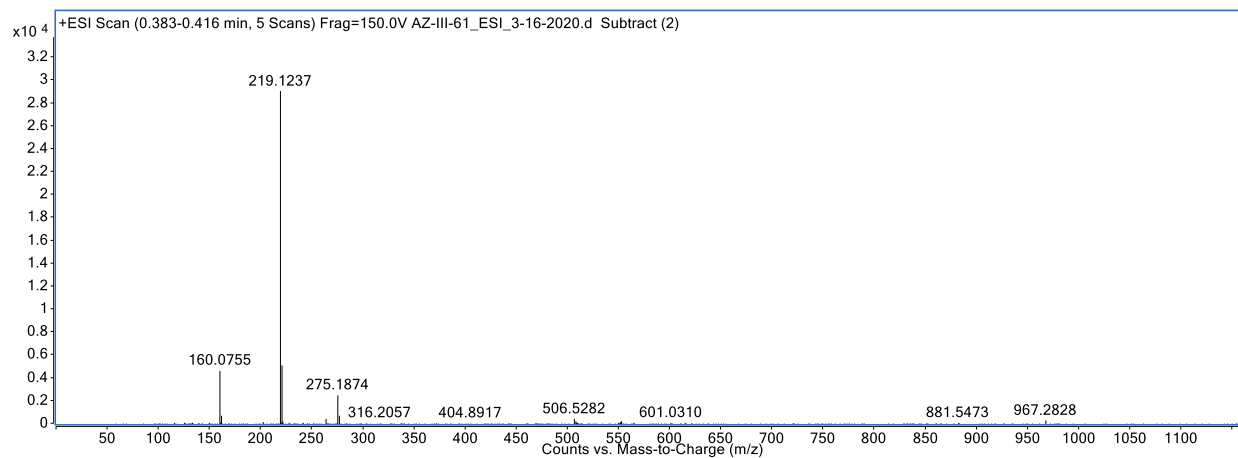

## 6.2.8 IEG

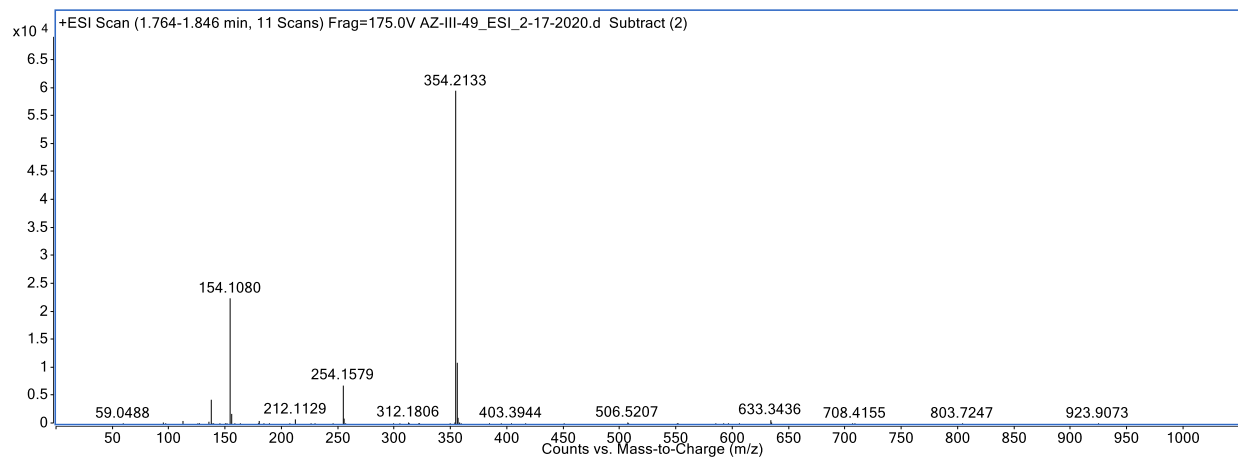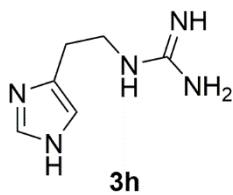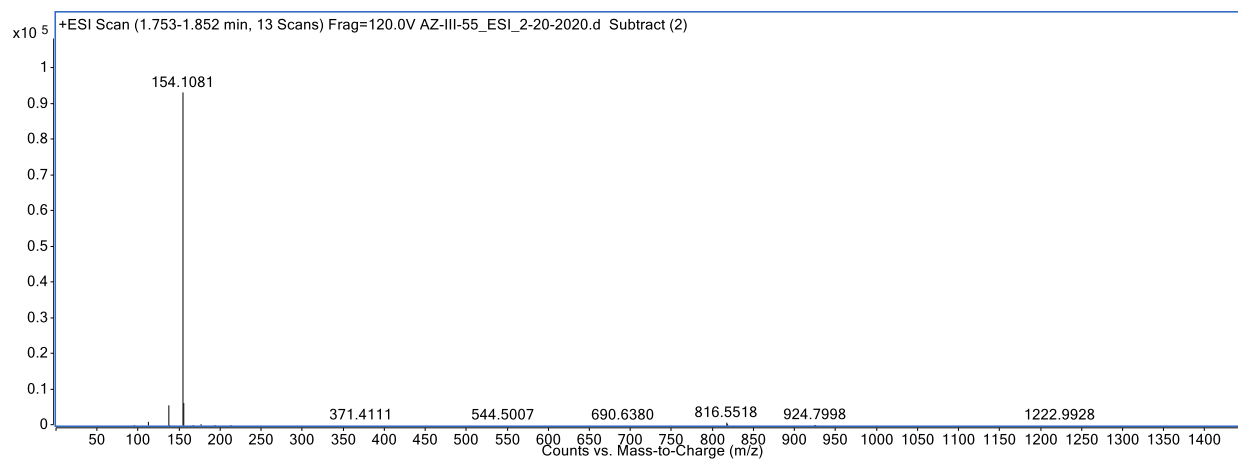

## 6.2.9 3F-PHPOG

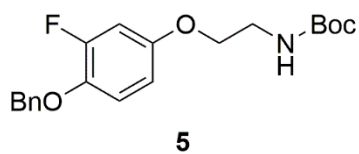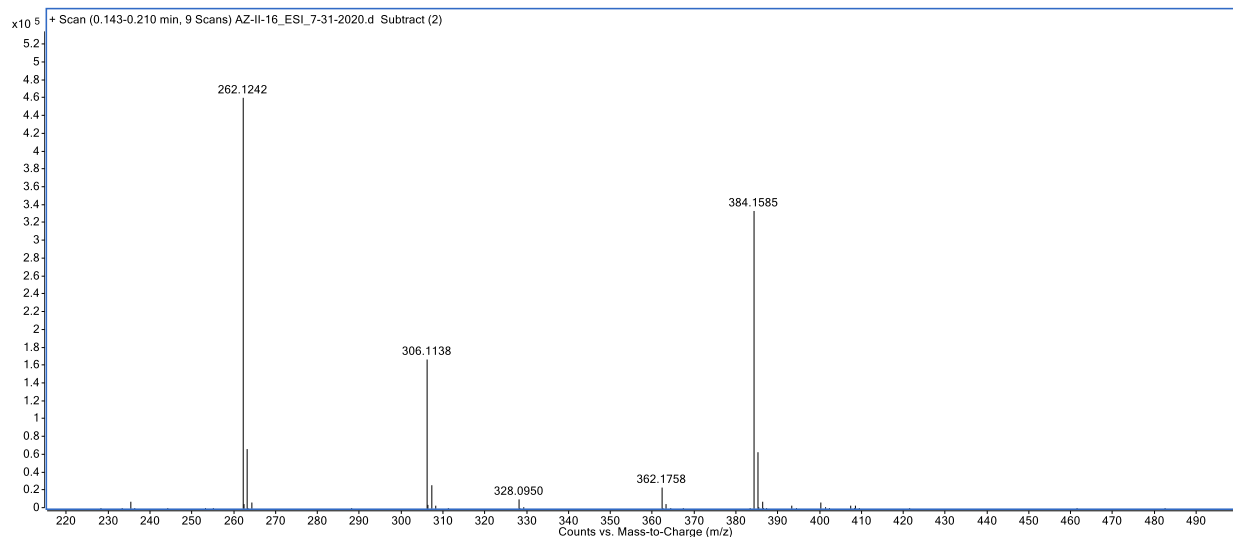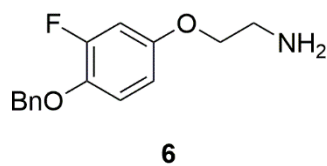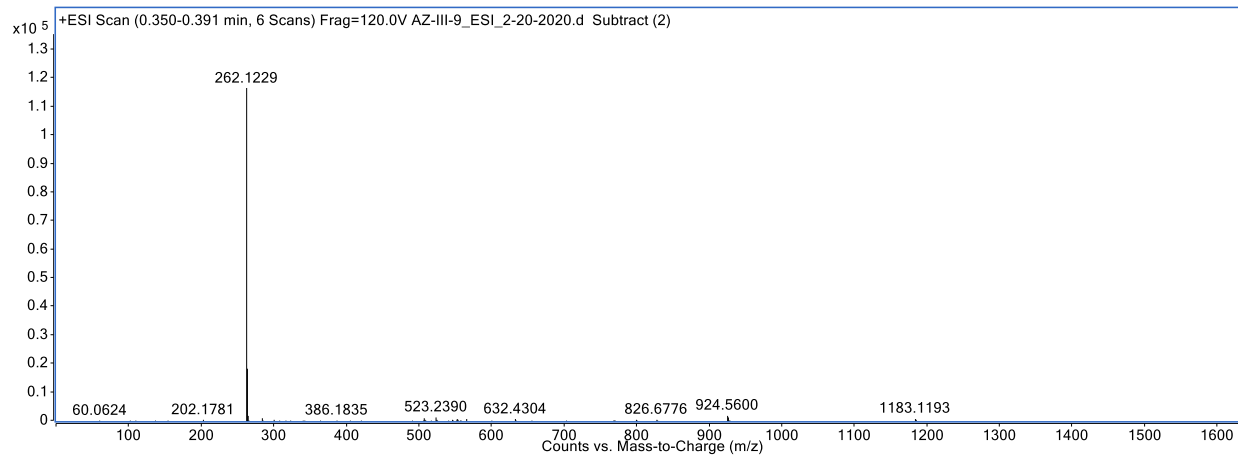

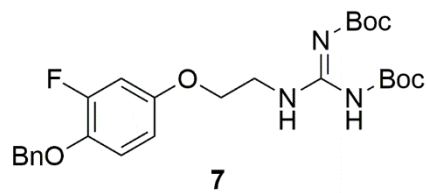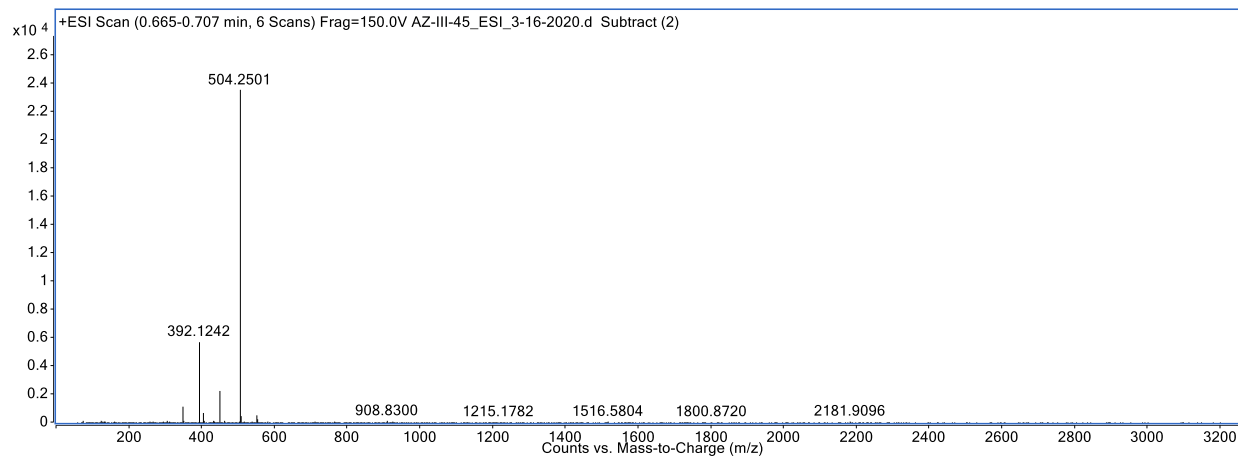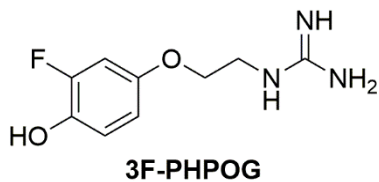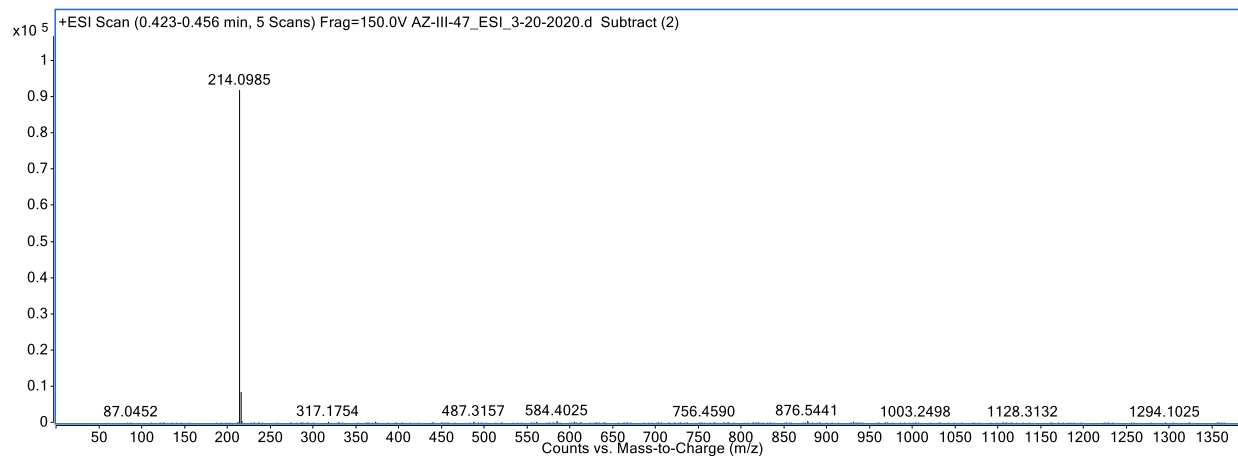



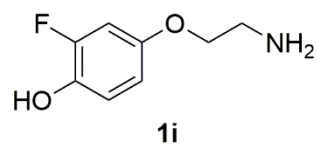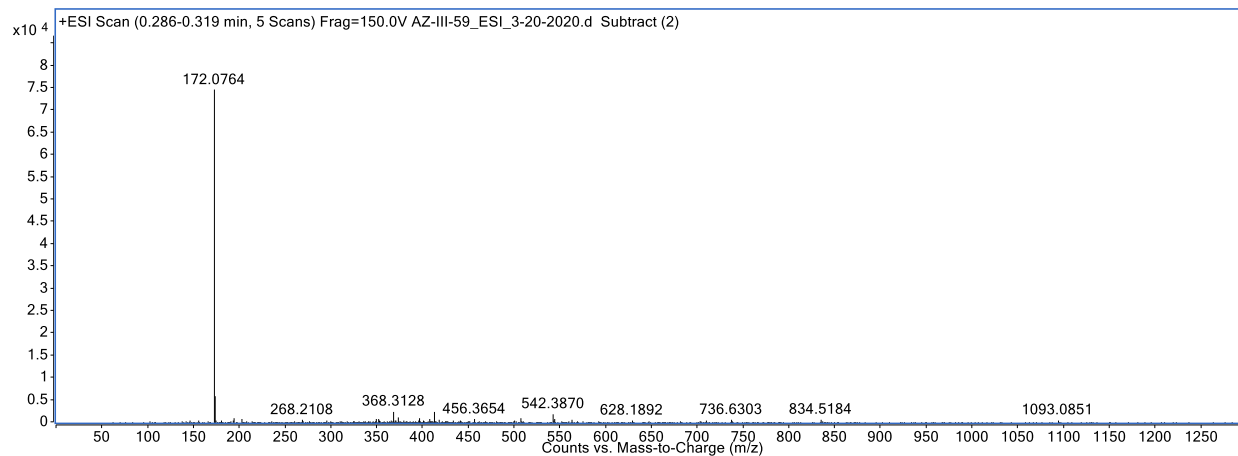

## 6.3 Radio-HPLC

### 6.3.1 [ $^{11}\text{C}$ ]MFBG

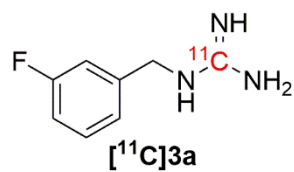

[ $^{11}\text{C}$ ]MFBG ([ $^{11}\text{C}$ ]3a) RAD trace overlaid with UV trace (254 nm) spiked with MFBG **3a**

HPLC Conditions: B

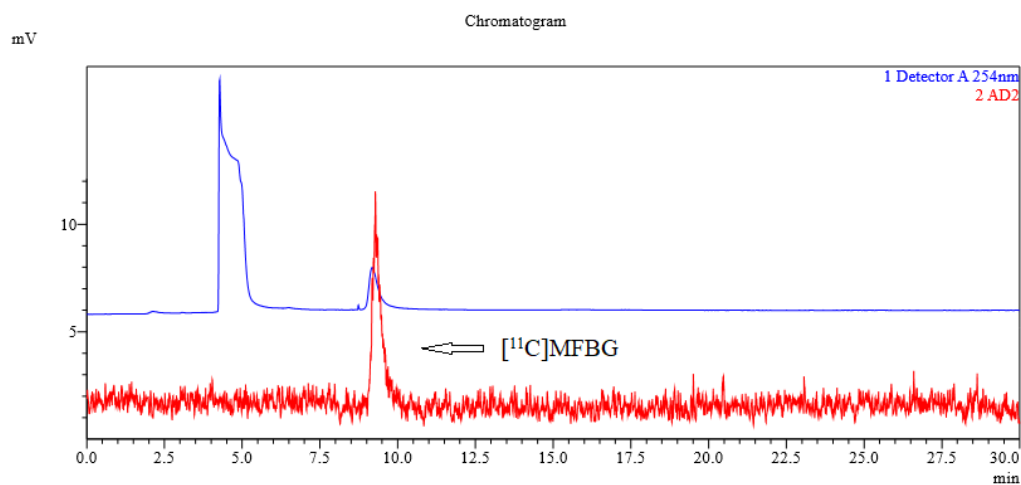

[ $^{11}\text{C}$ ]MFBG ([ $^{11}\text{C}$ ]3a) preparative HPLC trace:

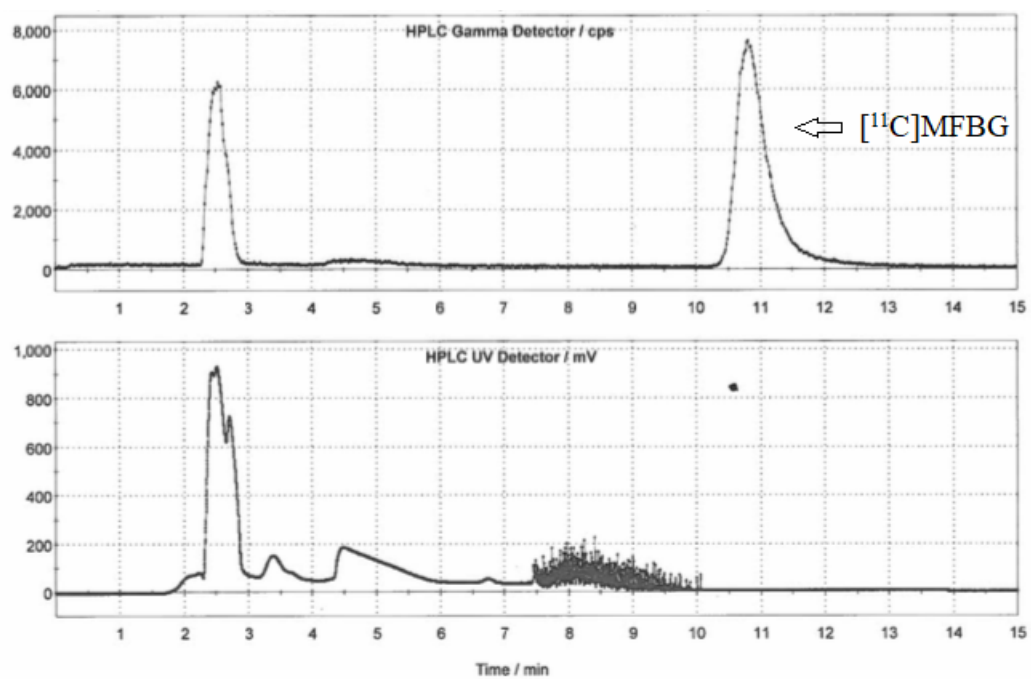

### 6.3.2 [ $^{11}\text{C}$ ]MFPG

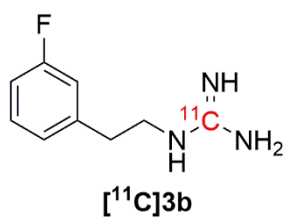

[ $^{11}\text{C}$ ]MFPG ([ $^{11}\text{C}$ ]3b) RAD trace overlaid with UV trace (254 nm) spiked with MFPG **3b**

HPLC Conditions: B

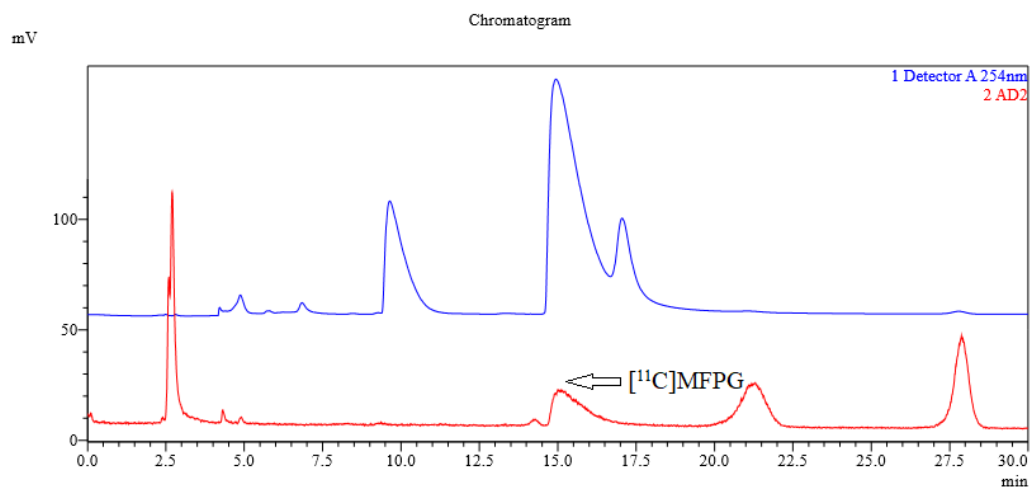

### 6.3.3 [ $^{11}\text{C}$ ]5F-MHPG

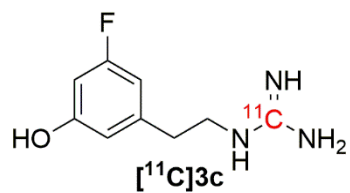

[ $^{11}\text{C}$ ]5F-MHPG ( $[\text{}^{11}\text{C}]\mathbf{3c}$ ) RAD trace overlaid with UV trace (254 nm) spiked with 5F-MHPG  $\mathbf{3c}$

HPLC Conditions: A

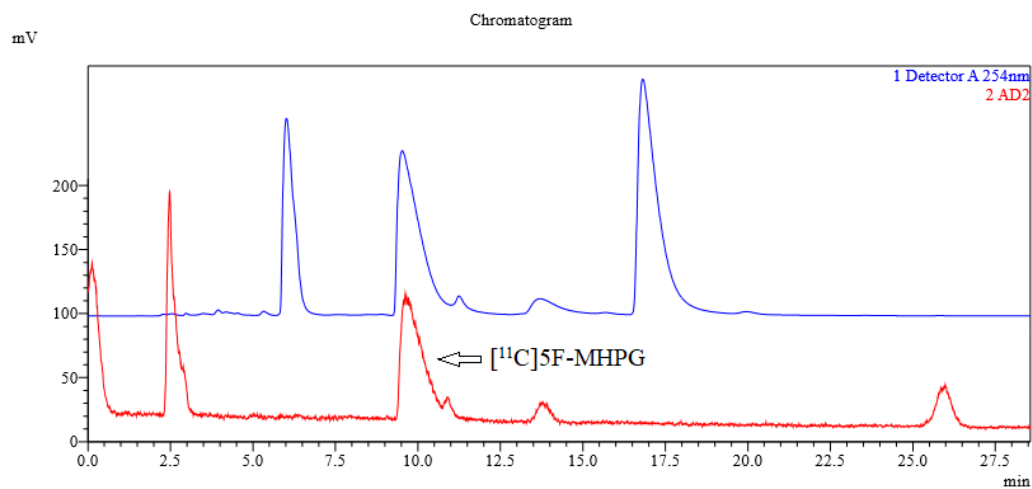

### 6.3.4 [ $^{11}\text{C}$ ]DOPG

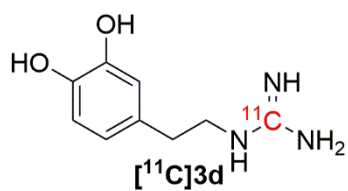

[ $^{11}\text{C}$ ]DOPG ( $[\text{}^{11}\text{C}]\mathbf{3d}$ ) RAD trace overlaid with UV trace (254 nm) spiked with DOPG  $\mathbf{3d}$

HPLC Conditions: A

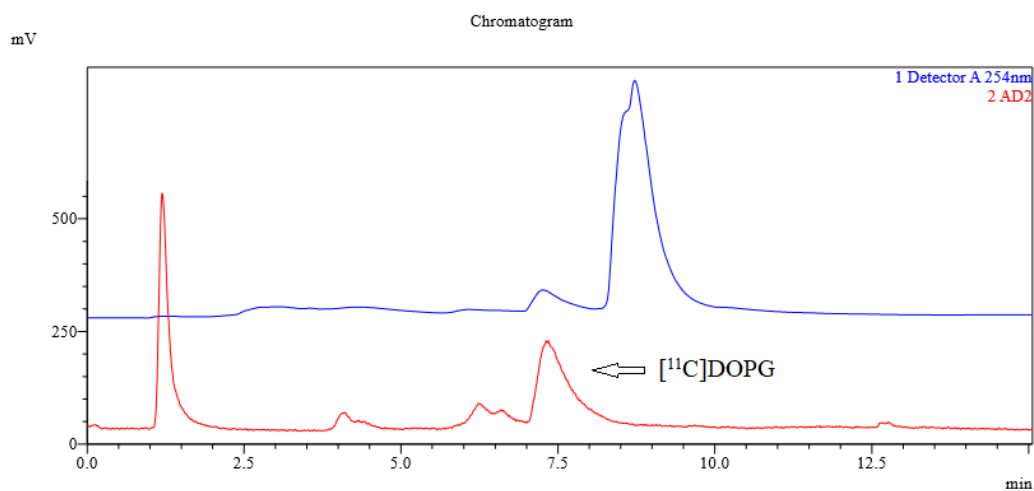

### 6.3.5 [ $^{11}\text{C}$ ]GMO

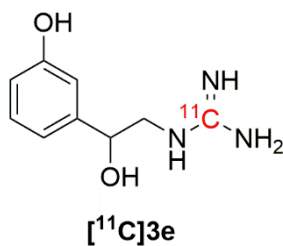

[ $^{11}\text{C}$ ]GMO ([ $^{11}\text{C}$ ]3e) RAD trace overlaid with UV trace (254 nm) spiked with GMO 3e

HPLC Conditions:

*Conditions:* 10% EtOH in 60 mM  $\text{NH}_4\text{OAc}$

*Flow rate:* 5 mL/min

*Column:* Phenomenex Synergi HydroRP 80A 250 x 10.00 mm. 10 $\mu$ .

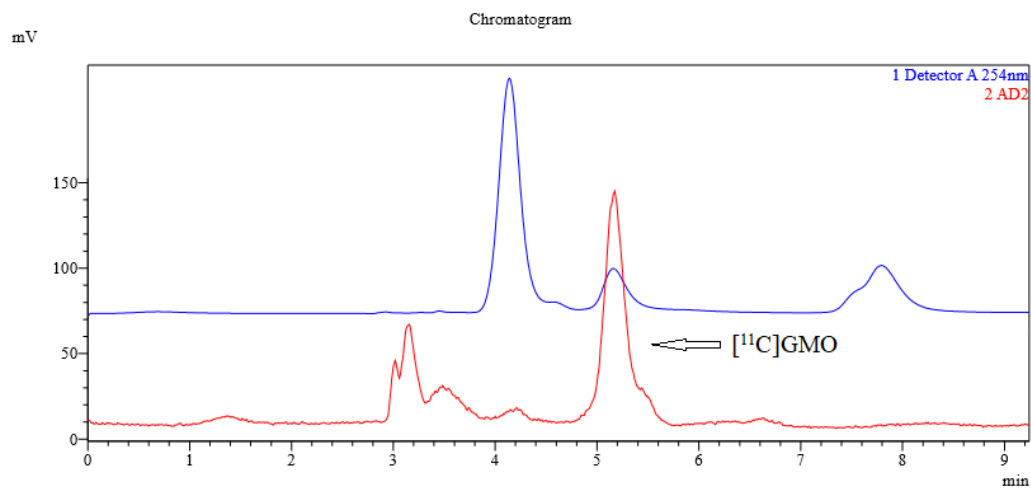

### 6.3.6 [ $^{11}\text{C}$ ]MIBG

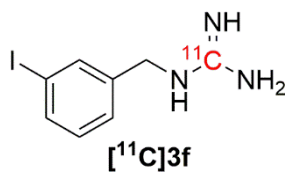

[ $^{11}\text{C}$ ]MIBG ([ $^{11}\text{C}$ ]3f) RAD trace overlaid with UV trace (254 nm) spiked with MIBG 3f

HPLC Conditions: A (0-30% EtOH in 10 mM NaOAc)

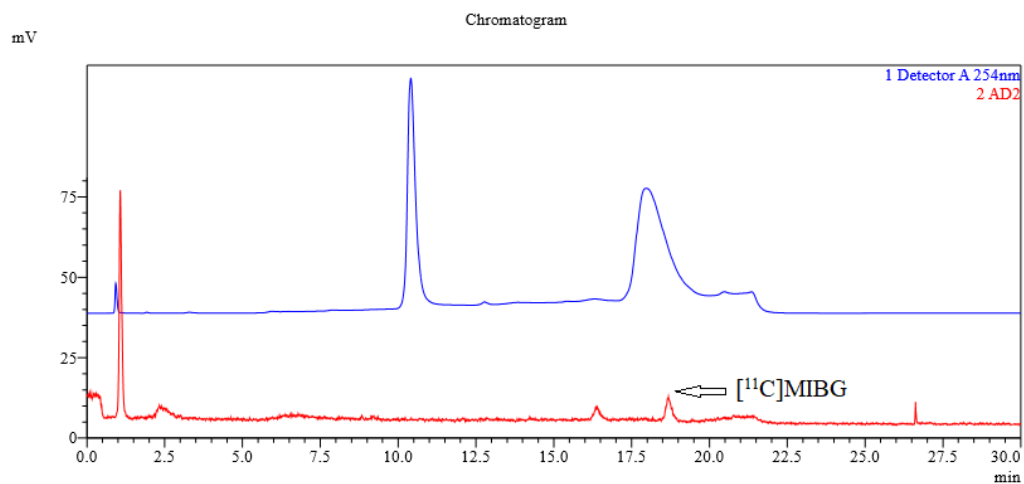



### 6.3.7 [ $^{11}\text{C}$ ]HTG

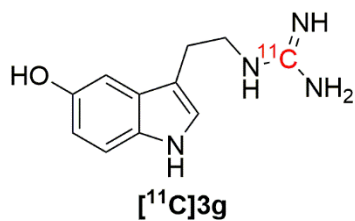

[ $^{11}\text{C}$ ]HTG ([ $^{11}\text{C}$ ]3g) RAD trace overlaid with UV trace (254 nm) spiked with HTG 3g

HPLC Conditions:

*Conditions:* 10% EtOH in 60 mM  $\text{NH}_4\text{OAc}$

*Flow rate:* 6 mL/min

*Column:* Phenomenex Synergi HydroRP 80A 250 x 10.00 mm. 10 $\mu$ .

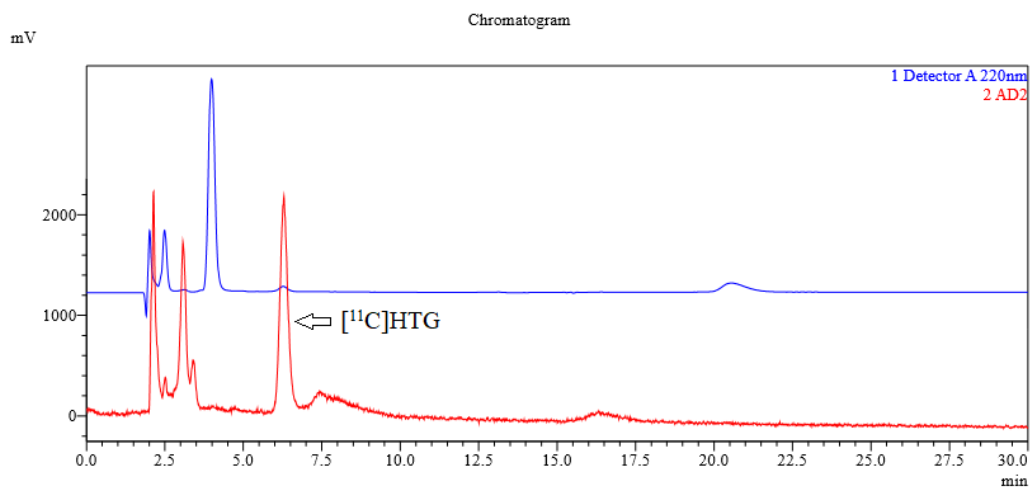

### 6.3.8 [ $^{11}\text{C}$ ]IEG

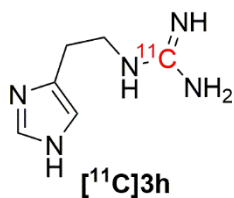

[ $^{11}\text{C}$ ]IEG ( $[\text{}^{11}\text{C}]\mathbf{3h}$ ) RAD trace overlaid with UV trace (254 nm) spiked with IEG  $\mathbf{3h}$

HPLC Conditions:

*Conditions:* 2.5% EtOH in 60 mM  $\text{NH}_4\text{OAc}$

*Temperature:* 40 °C

*Flow rate:* 1.2 mL/min

*Column:* Phenomenex Synergi HydroRP 80A 250 x 4.6 mm. 10 $\mu$ .

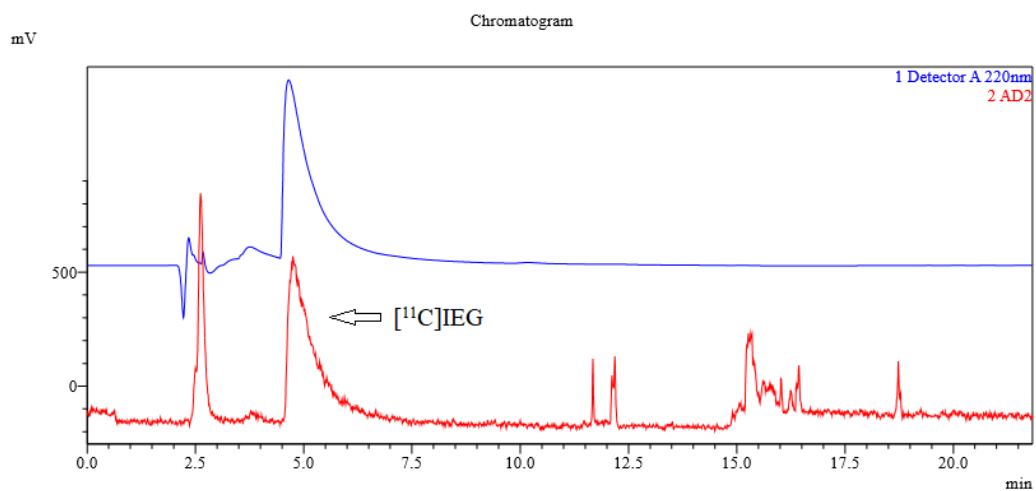

### 6.3.9 [ $^{11}\text{C}$ ]3F-PHPOG

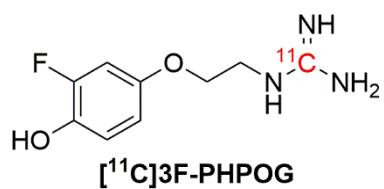

[ $^{11}\text{C}$ ]3F-PHPOG ([ $^{11}\text{C}$ ]3i) RAD trace overlaid with UV trace (254 nm) spiked with 3F-PHPOG  
**3i**

HPLC Conditions: A

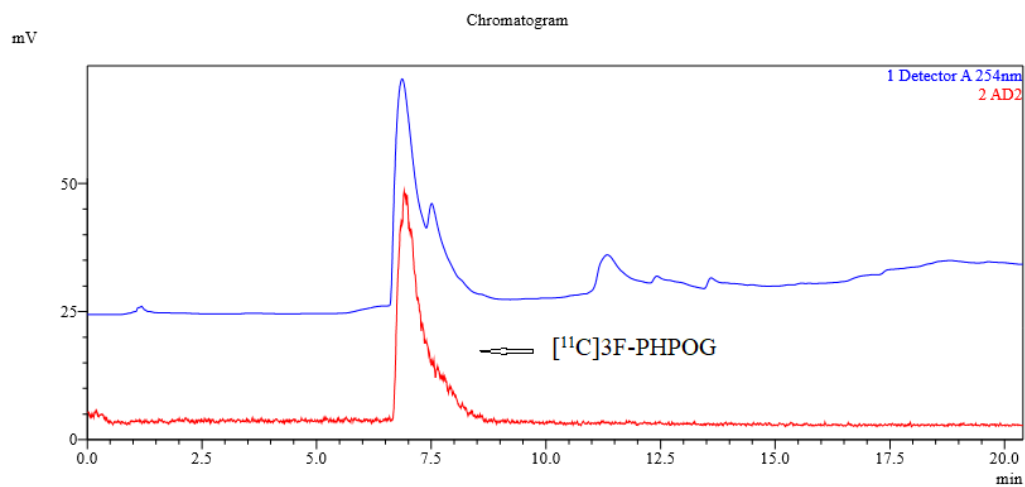

[ $^{11}\text{C}$ ]3F-PHPOG ([ $^{11}\text{C}$ ]3i) Preparative HPLC:

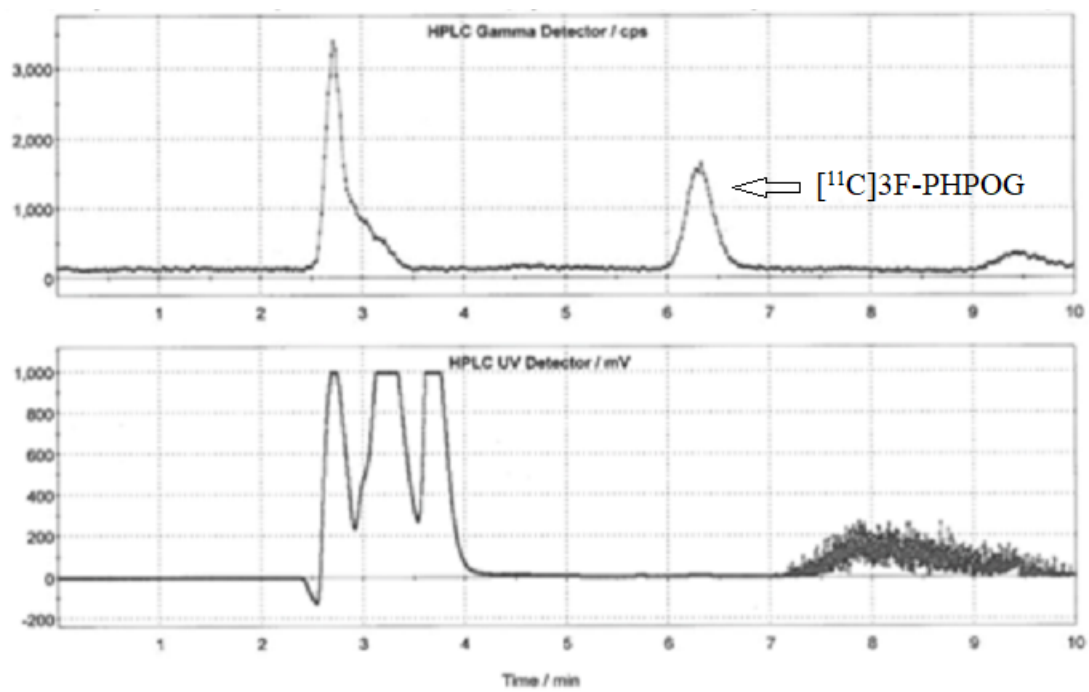

Supplement: Supplementary file 1 [file 24973756]
